# Supplementary material for: Dissecting Metabolic Control of Behaviors and Physiology During Aging in Drosophila
Source: Research Square preprint supplement (doi:10.21203/rs.3.rs-6550812/v1), 2025-05-09
Supplement: Supplementary file 1 [file abb95735141a8652280779d5.xlsx]

## Sheet: Cover page
Source data for
Title:
Elizabeth Pasam, Kishore, John Watson, GM
1. Department of Pathology, Division of Molecular and Cellular Pathology, Heersink School of Medicine, University of Alabama at Birmingham, Birmingham, AL 35294, USA.
This excel file includes source data and statistical analyses for:
(Fig1) Figure 1.a,b,c,d,e,f,g,h,i
(Fig 2) Figure 2. a, c, d, e, f
(Fig3) Figure 3. a,b,c,d,e,f,g,h,I ,a',b',c',d',e',f',g',h',i'.
(Fig4) Figure 4. a,a',b,b',c,c',d,d',e,e'.
(Fig5) Figure 5. f,g, h, i.

## Sheet: Fig 1
																																															Table Analyzed	TOTAL SLEEP
Figure 1a
w1118			Ald			AdSL			mAcon1			Nmdmc			Gnmt			SdhD			LSD2			Marf			GlyP			Sardh			Ampkα			Ogdh											Two-way ANOVA	Ordinary
3 w	6w		3 w	6w		3 w	6w		3 w	6w		3 w	6w		3 w	6w		3 w	6w		3 w	6w		3 w	6w		3 w	6w		3 w	6w		3 w	6w		3 w	6w										Alpha	0.05
1057.67	1050.67		635	1255		805.333	982.667		971.667	1115.33			1148.33		978.667	1092		1107.33	959		827.667	932		984.333	937.667		995.333	1082.33		973.333	1187		835	1008			900.333					3 W	+
1132.67	1108.67		1060	1088.67		948.333	1264.67		1033.33	977		770.667	1005.33		977.333	1307		1068.67	1081		1122	1281		765.333	887		1011.33	1332		1167.33	985.333		872.333			919.333	1018						Ald				Source of Variation	% of total variation	P value
1109	1211		1175	1299.33		881	777.667		1000	904.333		1096.67	1015.33		998.333	1299.67		1082.67	892		890.667	1255.33		1096.67	1253.33		994.333	874		797			948.667	1161.67		889.667	1175.33						AdSL				Interaction	7.686	<0.0001
1129.67	963.667		725.333	1178.33		1213	786.333		996	1298.33		919.333	1386.33		1098.33	1217.33		1214.33	1257.67		996.333	1242.67		811.333	1075.67		849				826		958.333	1021.33		959.667	1044.33						mAcon1				Row Factor	2.435	<0.0001
1219.33	1099.33		1054.33	1218.33		1078.33	1076.33		1024.33	992.667		939.667	1135		1097.67	1159		1083			875	1157.33		819.333	1197.67		821.667	1044		1027.67	657.333		1110	734.667		1083.33	1081.33						Nmdmc				Column Factor	8.358	<0.0001
1069.33	838		1001.33	1241.33					1090.33			1049.33			1011	1040.33		974.667				1069.67		990.667	1000.67		1076.33	1265.67		949.667	986.333		919.333			1080.67	940.333						Gnmt
997.333	988.333		1073.33	1094		762			806	937.333		960.667			870.667			1205.33	1250.33		1031.67	1067.33			1164.33		1010	1282		874.333	1047		1229.67	1155.67		975.333	1075.67						SdhD				ANOVA table	SS (Type III)	DF
947.667	1022.67		701.667	1219.67			1151.67		1192	867		1026.67			983	1172.33		790.333	702.333		1073.33	981		1069.33	1247.67		707.667	1291			823		1194.67	1108.33		1108.33	720.333						LSD2				Interaction	1149317	12
1088.33	968		1042.33	1422.67			1233		1237	1117.67		1277.67	1191		930.667	1167.67		1131	1094.67		1134.67	810		1296	1088.33		1079.67	1079			761.667		1164	1349.33		920.667	1032.33						Marf				Row Factor	364123	1
1090.67	713		1217.67	871.667			1109.67		1286	1360.33		1312	1372		1228.67	1280		1047	1055		1081.67	691		1089.33	1294		970.667	1301			1154		1197.67	886.667		820.333	1307.67						GlyP				Column Factor	1249713	12
990			682.333	1275.33			1237		1228.67	1141.33		1223	1272.67		1252	1196.67		1078.33	770.333		789	660		967.333	1077.33		1079.67	1226.33			1270		1212	1058.33		956.667	817						Sardh				Residual	12176305	517
1079.33			1005.67	1168.67			942.667		1390	1226.67		1202.33	876.667		1257	1185.67		1181	1095		754.333	1146.33			1334.33		865	1281.67					1102.33	1149.67		1007.33	822.333						Ampkα
1076.67	680.667		950.333	1196.33			961.667		1289.33	1275		1219.33	1302.67		1249	1145.67		928	740		1141.33	975		1225.67	1304.33		826.667	1036.67			953.667		1154.67	895		1045.67	1045.33						Ogdh				Difference between row means
1108	854.333		1281	1206.33			835.667		1315	1364.67		1221	1305.67		856.667			1313.67	1385.67			1021.33		1077.67				1177			1079		1051.33	771		1097.33	1042.67										Predicted (LS) mean of 3 weeks	1029
1081	1052		989	1337			1124		889.667	1439		1362.33	1075		1116.33			931			1155.33	966.667		1338	1212.67			1255			961		1166	966.333		772.667	849.667										Predicted (LS) mean of 6 weeks	1086
991.333	849.667		1096.67	1280					1167	1092.67		1215	1176.33		762.667			1198.33			1109.67	1238		1259.67	1139.33			1284.33			1084		1365.67	1028.33		930	1053					6w					Difference between predicted means	-57.27
892.667	1116.67		709.333	1184					1097	1348		1234.33	1069.67		986			783.333			884	1265.33		1280.33	1121			1137.67			1185.67		1188.33	999.667		1066	1316						+				SE of difference	14.57
874	1057.33		867	1044.33					944.667	1307.67		1342	829.667		1180.33			1193.67			1116.67	1113.33		1279.33				1221.33			986.667		1219.67	1114		1022.33	1281.67						Ald				95% CI of difference	-85.89 to -28.66
879	1034.67		845.667	1082.67					1187.33	1238		1134.67	857.667		947.667						966	842.333		1289.67				1156.33			711		1282.67	1169.67		1129	1298						AdSL
	958		609	939					1213.67	1119.33		1265.33	1139.33		1075.33						918	1097		1263.33				1314.67			1185.33		1255.67	1198.67		998.667	1303						mAcon1				Data summary
945.667	1251		1169.33	1040					1077.33	1128.67		1121.33	728.667		1087						961	807.667		1206.67				956.667			930.333		998.333	1221.33		944.667	1107						Nmdmc				Number of columns (Column Factor)	13
993	1113.33			1065.33					1109.67	1216		1005.67	839								934	867.333		1244.33				1063			659		919.333	1335.67		784.333	1252.33						Gnmt				Number of rows (Row Factor)	2
947	1153			1290						1175.33		1284.33	1084.33								1101	1298.33		912.667							1045.33		1298.67	1104.67			1145.67						SdhD				Number of values	543
	1078.33			1055.33						1035.33			1204.67									967.667									899.333			962			1048						LSD2
	659.333			1136.33						995.333			948									842											1097	1038			973						Marf
				1016						953.667			1110									1257											918.667				1122.33						GlyP
				1188.67						1027												827.667											934.333				1088.67						Sardh
				1184						1334			1141.33									655.333											1033.67				1264						Ampkα
										1235			1034.33									880											1010				1233						Ogdh
										1260.67			1072									796.667											1067				1192.33
																																	1139				1377
																																	1030.67				1220.33
																																					1289.33
																																	917.333				1327
																																	862.333				1254.67
																																	996.667				1038.67
																																	982
																																	1123.33
																																	1034.33
																																	1195.33
																																															Table Analyzed	DAY SLEEP
Figure 1b
w1118			Ald			AdSL			mAcon1			Nmdmc			Gnmt			SdhD			LSD2			Marf			GlyP			Sardh			Ampkα			Ogdh											Two-way ANOVA	Ordinary
3 w	6w		3 w	6w		3 w	6w		3 w	6w		3 w	6w		3 w	6w		3 w	6w		3 w	6w		3 w	6w		3 w	6w		3 w	6w		3 w	6w		3 w	6w										Alpha	0.05
531.333	433			622.333		406	439.333		418.667	496.667		372.333	473.333		421.333	364.333		529.333	504.667		388.333	366		426.333	471		413.333	565.333		418	611.667			449.333		289.667	391.333					3 W	+
562.667	484		430.333	570		407.667	613.333		472.667	381		392	449		396	195.667		513.333	640.333		538.667	621.667					452.667	675.333			524.667		395.667	455.667		327.667	401.667						Ald				Source of Variation	% of total variation	P value
547.667	566.667		565.333	651.333		374.333	334.333		460	376.333		563.667	499		394.333	198.333		513	660.333		464.667	617.667		518	619.667		387.333	378.667		490.333			467.667	378		276.667	530.667						AdSL				Interaction	9.591	<0.0001
523.667	426.333		307.667	591.667		573.667	283.667		463	638.667		468.333	666.667		467.667	232		630.667	625		434.667	622.667		402.667	514.333		348.333	405		390.667	409		485.333	578.667		378.667	493.667						mAcon1				Row Factor	1.283	0.0047
610.333	490		505	611.333		512.333	497		488	412.333		492.333	562.667		487.333	343.333		499	595.667		466	629		352.333	564.333		393.333	423.667		458.667	297.667		575.667	542.333		495.333	439.667						Nmdmc				Column Factor	8.273	<0.0001
515	377.667		386.333	603		389.333			513.667			442			444.333			415	491			482		349.333	561		515	645		405.667	447		429.333	598		442	352.333						Gnmt
370.333	471		513.667	499		295			328.667	440.333		325.667			314.333	327		604.667	586		495.333	443.667			617.667		452.333	625.333		385	513.333		632.333			379	428.667						SdhD				ANOVA table	SS (Type III)	DF
485	460.333		279.333	599			467		319	393.667		405.333			511.667	517			283.667		583.667	360		529.667	618		297	637.333			403		557.667	395		515	308						LSD2				Interaction	599848	12
502.333	617		491.667	713.667			602		624.333	542.333		604.667	550.333		379	572.333		497.667	539.333		522.333	305		630	453.333		464.667	522			475.667		596	492		430.333	473.667						Marf				Row Factor	80254	1
613	508.667		587	423			517.667		550	703		651.667	667.667		648	609.667		477	472.333		468	298.333		481.667	643.667		400.667	640.333			577		640.667	538		320	629						GlyP				Column Factor	517424	12
489.667	581		389.333	617.667			625.333		674.333	496		589.333	607.333		674	582.667		449	273		344			488	510.667		509.333	585			638.667		547.333	339.667		393.333	362.667						Sardh				Residual	5137505	515
594	510		484	590.667			495.333		579.667	686.667		593.333	521		610.333	569.333		548.667	489.333		296	574		547	656.333		319.333	641.667			402.667		544.667	413.667		439.333	343.333						Ampkα
495	299.333		426	591			386.333		704.667	636.667		580	651.333		634.333	599.333		358	453.667		570	408		597	654.333		322.667	421			490.333		575.333	411		417.333	443.667						Ogdh				Difference between row means
506.333	360.667			624.333			405		672	707.333		577.333	641.667		537.667	417.667		668	692.667		375.667	515.333		466				609			548.667		539.667	460		482	436.667										Predicted (LS) mean of 3 weeks	478.9
585.333	339		472	691.667			548		646.667	719.333		699.667	559.333		610.667			444			564.333	436		690.333	581.667			596			464.333		603	430.333		332.667	364.333										Predicted (LS) mean of 6 weeks	505.6
527.667			510.667	620.333					287.667	545		552.333	624.667		349.333			603.333			532	606.333		691	491			629			465		699	511.667		374.667	474					6w					Difference between predicted means	-26.65
493.667			297	536					606	682		607	493.333		472						354.333	587.667		679.667	502.333			536.333			589.667		585.667	539.667		560	642						+				SE of difference	9.397
483	364		311	535.333					470	642.333		667.667	314.333		551.667			633			561	543.667		640.667				577			440		582.333	578.333		446.667	602						Ald				95% CI of difference	-45.11 to -8.192
455.333	397.333		365	516.333					380	599.333		492.667	412		454.667						392.667	424		644.333				497.333					640	600.333			613.333						AdSL
341.667	539.333			382					612.333	578.667		617.667	485		648.333						413	588.667		654.667				652.333			558.333		630.667	652.667		433	640						mAcon1				Data summary
499	400.667		557.333	400.667					578	504		531	341		548.667						470.667	444.667		606				448.667			363.667		506.667	476.667		401.667	477.333						Nmdmc				Number of columns (Column Factor)	13
501	615.333			496.333					475.333	562.333		409.667	277.667								421.333	312.333		633.667				440					412	415.333		283	577.333						Gnmt				Number of rows (Row Factor)	2
522	611.333			637					520.333	537.667		616	436								587	692.667		406.667							501			459.667			518						SdhD				Number of values	541
	468.667			434.333						504.667			571.667									386									320.667						533						LSD2
	456.333			577.667						454.333			393.333									297															426						Marf
				517.667						424			445									677.333											497.333				505.333						GlyP
				576						513												345											391.333				486						Sardh
				542.667						669			505									239											416.333				670.667						Ampkα
										586			469									337.667											552.667				553						Ogdh
										665.333			522.667									282											462.333				560.333
																																	643.667				675
																																	647				570.333
																																	549.333				638
																																	417				657
																																	468.667				648.667
																																	429				480
																																	511
																																	547
																																	666.333
																																	543.667
																																															Alpha	0.05
Figure 1c
w1118			Ald			AdSL			mAcon1			Nmdmc			Gnmt			SdhD			LSD2			Marf			GlyP			Sardh			Ampkα			Ogdh											Source of Variation	% of total variation	P value
3 w	6w		3 w	6w		3 w	6w		3 w	6w		3 w	6w		3 w	6w		3 w	6w		3 w	6w		3 w	6w		3 w	6w		3 w	6w		3 w	6w		3 w	6w										Interaction	5.776	0.0002
531.333	617.667		447	632.667		406	543.333		418.667	618.667			675		557.333	587.333		578	509.667		439.333	566		558	466.667		582	517		555.333	575.333		553.667	533.667		440	509					3 W	+				Row Factor	4.73	<0.0001
562.667	624.667		629.667	518.667		407.667	651.333		472.667	596		378.667	556.333		581.333	666.667		555.333	625.333		583.333	659.333		462.667			558.667	656.667		611.333	460.667		476.667	719.667		555.333	616.333						Ald				Column Factor	10.41	<0.0001
547.667	644.333		609.667	648		374.333	443.333		460	528		533	516.333		604	639.333		569.667	514		426	637.667		578.667	633.667		607	495.333					481	585		506	644.667						AdSL
523.667	537.333		417.667	586.667		573.667	502.667		463	659.667		451	719.667		630.667	592.333		583.667	679		561.667	620			561.333		500.667				417		473	480.333		575.667	550.667						mAcon1				ANOVA table	SS (Type III)	DF
610.333	609.333		549.333	607		512.333	579.333		488	580.333		447.333	572.333		610.333	563.333		584			409	528.333		467	633.333		428.333	620.333		569	359.667		534.333	449.667		514.333	641.667						Nmdmc				Interaction	198263	12
515	460.333		615	638.333		389.333			513.667			607.333			566.667	549.333		559.667			572.333	587.667		641.333	439.667		561.333	620.667		544	539.333		490			565.667	588						Gnmt				Row Factor	162367	1
370.333	517.333		559.667	595		295			328.667	497		635			556.333			600.667	664.333		536.333	623.667			546.667		557.667	656.667		489.333	533.667		597.333	613.333		543	647						SdhD				Column Factor	357230	12
485	562.333		422.333	620.667			684.667		319	473.333		621.333			471.333	655.333		530.333			489.667	621		539.667	629.667		410.667	653.667			420		637	510.333		501.333							LSD2				Residual	2692771	512
502.333	634		550.667	709			631		624.333	575.333		673	640.667		551.667	595.333		633.333	555.333		612.333	505		666	635		615	557					568	658.667			558.667						Marf
613	604.667		630.667	448.667			592		550	657.333		660.333	704.333		580.667	670.333		570	582.667		613.667	392.667		607.667	650.333		570	660.667			577		557	491.667		591.667	678.667						GlyP				Difference between row means
489.667	572			657.667			611.667		674.333	645.333		633.667	665.333		578	614		629.333	497.333		445	474.333		479.333	566.667		570.333	641.333			631.333		664.667	566.333		613							Sardh				Predicted (LS) mean of 3 weeks	540.5
594	568.333		521.667	578			447.333		579.667	540		609	355.667		646.667	616.333		632.333	605.667		458.333	572.333			678		545.667	640					557.667	611.667		581	479						Ampkα				Predicted (LS) mean of 6 weeks	579.2
495	360		524.333	605.333			575.333		704.667	638.333		639.333	651.333		614.667	546.333		570			571.333	567		628.667	650		504	615.667			463.333		579.333	555.333		588	601.667						Ogdh				Difference between predicted means	-38.65
506.333	607.667		625.667	582			430.667		672	657.333		643.667	664					645.667	693			506		611.667	436.333			568			530.333		511.667			638.667	606										SE of difference	6.956
585.333	374.333		517	645.333			576		646.667	719.667		662.667	515.667		505.667						591	530.667		647.667	631			659			496.667		563	555.333		596.333	485.333										95% CI of difference	-52.31 to -24.98
527.667	419		586	659.667					287.667	547.667		662.667	551.667		413.333			595			577.667	631.667		568.667	648.333			655.333			619		666.667	568.333		593.333	579					6w
493.667			412.333	648					606	666		627.333	576.333		514			520			529.667	677.667		600.667	618.667			601.333			596		602.667	569.333		490.333	674						+				Data summary
483	317		556	509					470	665.333		674.333	515.333		628.667			560.667			555.667	569.667		638.667				644.333			546.667		637.333	602.333		500.333	679.667						Ald				Number of columns (Column Factor)	13
455.333	457		480.667	566.333					380	638.667		642	445.667		493						573.333	418.333		645.333				659			487.667		642.667	630		563.333	684.667						AdSL				Number of rows (Row Factor)	2
341.667	512.667		410.333	557					612.333	540.667		647.667	654.333		427						505	508.333		608.667				662.333			627		625	620.333		568	663						mAcon1				Number of values	538
499	449		612	639.333					578	624.667		590.333	387.667		538.333						490.333			600.667				508			566.667		491.667	621		628.333	629.667						Nmdmc
501	501.333			569					475.333	653.667		596	561.333								512.667	555		610.667				623			440.333		507.333	683		615.333	675						Gnmt
522	446.333			653					520.333	637.667		668.333	648.333								514	605.667		506							544.333		666	628			627.667						SdhD
	566			621						530.667			633									581.667									578.667			546.667			515						LSD2
	501.667			558.667						541			554.667									545											599.667	578.333			547						Marf
				498.333						529.667			665									579.667											527.333				617						GlyP
				612.667						514			342.333									482.667											518				602.667						Sardh
				641.333						665			636.333									416.333											481				593.333						Ampkα
										649			565.333									542.333											547.667				680						Ogdh
										595.333			549.333									514.667											423.333				632
																																	492				702
																																	481.333				650
																																					651.333
																																	448.667				670
																																	433.333				606
																																	485.667				558.667
																																	435
																																	457
																																	490.667
																																	615
																																															Table Analyzed	TOTAL SLEEP FRAGMENTATION
Figure 1d
w1118			Ald			AdSL			mAcon1			Nmdmc			Gnmt			SdhD			LSD2			Marf			GlyP			Sardh			Ampkα			Ogdh											Two-way ANOVA	Ordinary
3 w	6w		3 w	6w		3 w	6w		3 w	6w		3 w	6w		3 w	6w		3 w	6w		3 w	6w		3 w	6w		3 w	6w		3 w	6w		3 w	6w		3 w	6w										Alpha	0.05
0.839342	1.56115		0.318278			2.98137			1.73002	3.05091		1.61502	1.84267		1.81679	2.24382		1.33858	2.7122		2.16526	3.55539		1.74966	2.92084		0.965182	1.35725		1.84121			2.52246	2.52246			3.11996					3 W	+
2.42263	0.885548		0.882027	0.856057		3.2676			1.69357	2.83908		2.51634	2.53672		2.66132	1.03802		1.16823	1.52986		0.740964	0.981094		3.28836	2.36831		1.18831	0.20849		1.17276	1.0501		2.54657	2.54657		2.1379	2.52089						Ald				Source of Variation	% of total variation	P value
1.42817	0.670727		1.07897	1.54499		3.06924			2.17778	3.16504		1.48101	3.90906		2.65668	0.997179		1.54005	2.04086		0.901322	2.13715		2.80874			1.50313	1.48284		1.39412						1.99853	1.4767						AdSL				Interaction	10.63	<0.0001
0.612721	3.19639		0.358189	0.342459			3.22184		1.52711			0.378816			1.61884	0.584155		0.630341	0.707682		1.70093	0.96286			1.78621		1.49836			1.9827	3.06712		0.706509	0.706509		2.92706	2.33046						mAcon1				Row Factor	0.1461	0.3592
1.90776	0.791616		1.60044			2.39632	3.68752		2.47326	2.33717		0.325542	3.26052		1.69757	1.6704		1.10967			1.85917	2.31839		1.58177	1.64106		1.4069	1.31088		2.10404	3.10349		0.886025	0.886025		1.95323	1.13251						Nmdmc				Column Factor	11.15	<0.0001
2.26228	2.69242		0.459796	0.750806					2.60878			0.26485			1.44085	0.827085		1.95634				2.47089		1.73848	2.1919		0.91215	0.604616		1.48078	1.50279		0.785198	0.785198			2.55245						Gnmt
1.26814	1.7147		1.16653	0.591671		3.87416				2.73874		0.621212			2.57325			0.705775			1.68282	1.51158		2.80428	1.72633		1.85919	0.377437		2.01754	2.71676		0.661809	0.661809		1.89576	1.58827						SdhD				ANOVA table	SS (Type III)	DF
0.883001	1.99481		0.606978	0.875319			0.889146		2.62531			0.658194			2.4094			2.41262	1.60576		0.621765	1.17839		2.27598	1.69551			0.232662					1.04323	1.04323			2.60682						LSD2				Interaction	40.8	12
0.471068	0.793165		0.572571				0.591241		1.14849	2.00457		0.838428	0.197406		1.80623	0.471786		1.71176	1.74787		0.707501	0.792318		0.725652	2.32711		0.504271	0.815673			0.842597		1.51155	1.51155		2.34857	1.79109						Marf				Row Factor	0.5609	1
1.89674	0.531836			0.268288			2.06191		1.00898	0.204198					1.25918			1.99183	1.64518		1.4542	0.598328		0.543554	0.946433		1.33516	0.22208			0.915295		2.1477	2.1477		3.21224	0.543663						GlyP				Column Factor	42.79	12
1.05013	0.96367		0.369209	1.88708			0.198419		1.18274	1.32129		0.398245	0.25932		0.750954			1.6095	2.27146		3.00183	0.606061		2.68884	2.54218		1.65987	0.254438			0.546019		1.64314	1.64314		2.6482	2.85938						Sardh				Residual	304.9	458
0.799174	0.92017		0.661407	0.838728			1.17869		1.13407	0.96096		0.190476	3.20418			0.385859		0.940557	1.28341		1.98203	1.12012		3.1777	0.546204		2.10456	0.656006			1.30347		0.564828	0.564828		3.02121							Ampkα
0.758569	3.2326		0.329964	0.723394			1.96768			1.50695		0.405696	0.208994					2.44752	1.48559		1.67017	2.04627		1.34929	0.572645		1.42594	1.07147			2.51765		0.637681	0.637681		1.64704	0.804272						Ogdh				Difference between row means
0.69113	2.18445			0.741548					0.896587	0.283423		0.959471	0.252766		1.29702	1.81867					2.16161	1.92439		1.26994				0.697999			1.26877		0.871823	0.871823		2.27825	1.72145										Predicted (LS) mean of 3 weeks	1.638
0.549204	1.49525		0.511019				1.2847		0.582087			0.520499	1.46367		0.82398			2.20742			0.886324	2.6199		0.454629	1.36338			1.33944			1.99934		0.489738	0.489738		2.39301	2.2014										Predicted (LS) mean of 6 weeks	1.562
1.82238	3.59795		1.14117	1.33472					1.42987	3.40439		1.5478	0.698593					1.59119			0.673275	0.281458		0.286584	0.639848			1.29823			2.06683		0.534767	0.534767		3.43253	1.62976					6w					Difference between predicted means	0.07557
0.875795	2.63672			1.16669					2.37684	0.41541		2.07369	3.07302		2.56855						1.49334	0.370907		0.90289	1.09245			2.08184			1.68222		1.54224	1.54224		1.87159	0.766227						+				SE of difference	0.08233
1.94215	4.1228		1.89187						1.29293	0.628271		0.332555	2.15917		0.867307			1.02625			0.80597	0.8262		0.92116				1.72			2.60092		2.30505	2.30505		1.96612	0.858682						Ald				95% CI of difference	-0.08622 to 0.2374
	2.77227								2.2076	1.44759			2.32621		2.07398						2.83517	1.77426		0.713449				1.85654			3.01938		0.591224	0.591224		2.12666	0.650759						AdSL
1.60839	0.973384								0.70831	1.83601			1.0545		1.20521						2.98342	1.90104		0.562885				0.568289			1.78465		1.29333			2.55365	0.626717						mAcon1				Data summary
0.885721	2.90323		0.903292	1.41293					1.34001	2.55103			3.11675								1.06556	3.43431		1.936							2.47653		3.25302			2.82581	2.14375						Nmdmc				Number of columns (Column Factor)	13
0.465681	2.23881			0.961202					1.68977	1.38202			1.93895								2.74851	3.61568		1.53196				0.7552			3.16456		3.12094				0.541546						Gnmt				Number of rows (Row Factor)	2
	2.75614			1.09012					1.56453	1.02221			1.04529								1.26554	0.507273		3.19503							2.3598		1.49672				1.79359						SdhD				Number of values	484
	3.17698			1.3924									1.75602									1.2655									2.77984		1.77437				2.88645						LSD2
	2.67966			1.12997						2.85778			2.3959									1.42729											2.01198				3.07137						Marf
				1.83402						3.13254			1.48944									1.47057											1.33538				2.42473						GlyP
				1.37991						2.08966			4.1902									1.36945											3.11557				2.17555						Sardh
				0.360736						0.431784												3.46535															0.260319						Ampkα
										0.575643												2.61818											3.21814										Ogdh
										0.682351												1.87671											3.63664				0.164913
																																	2.00178				0.94697
																																	1.41933				0.399693
																																	1.13244				0.116926
																																	2.54764				1.20669
																																					1.56777
																																															Table Analyzed	DAY SLEEP FRAGMENTATION
Figure 1e
w1118			Ald			AdSL			mAcon1			Nmdmc			Gnmt			SdhD			LSD2			Marf			GlyP			Sardh			Ampkα			Ogdh											Two-way ANOVA	Ordinary
3 w	6w		3 w	6w		3 w	6w		3 w	6w		3 w	6w		3 w	6w		3 w	6w		3 w	6w		3 w	6w		3 w	6w		3 w	6w		3 w	6w		3 w	6w										Alpha	0.05
0.594816	1.48217		0.427816			1.01834			1.15605	2.75638			1.83856		0.981276			1.19653	1.55891		1.34256	0.346023			1.64479		0.758779	0.330191		0.691387	0.881036		2.29999	2.29999		2.36373	1.97789					3 W	+
0.496384	0.496384		1.22736	1.51427		2.89152			1.05524	1.93708		2.45153	0.997835		2.50568	0.677815		0.900487	1.3526		0.363861	0.554101			1.3057		1.06922	0.16831		0.743605	1.01046		2.30512	2.30512		1.88208	2.14041						Ald				Source of Variation	% of total variation	P value
	0.321618		2.11912	2.08686		2.3248			1.80731	2.28639		2.11162	1.9052		2.30776	0.605755		0.819201	1.3287		0.2011	0.271413		2.46843	0.387708		1.11034	0.707633			1.54856		1.53938	1.53938		1.61938	1.12142						AdSL				Interaction	9.096	<0.0001
1.27248	1.56535		1.43027	0.344256		1.00407	2.44458		0.892968	0.991693					1.44547	0.344178					1.14749	0.544118		1.91554	1.089		0.83526			1.11099	1.43486		1.91088	1.91088		3.17371	1.48473						mAcon1				Row Factor	0.5828	0.0712
0.237302	0.469445					2.25634	1.83104		0.976833	1.53604		2.73076	1.74487		1.51442	0.9536		1.02961			0.88722	1.03481			1.1075		0.85452	0.859524			0.970979		2.04995	2.04995		1.54531	1.04065						Nmdmc				Column Factor	7.7	<0.0001
1.12003	1.46227		0.559526	0.89497		0.816852			1.47226	2.31723		1.43294			0.992498	0.659878		1.62892				1.74612		1.61219	1.49911		0.380583	0.334023		0.726445	1.89226		0.625	0.625			1.30529						Gnmt
0.870488	0.892251		2.00651	0.815741		1.79322			1.06018	1.41938		2.52337			1.83245						1.13078	1.16736		1.78912	0.971803		1.31191	0.172593		0.795455	1.46926		0.567297	0.567297		1.29647	1.84038						SdhD				ANOVA table	SS (Type III)	DF
0.669563	1.28627		1.18809	1.28024			1.21633		1.70672	3.20131		0.802642			1.42661	0.781431		2.72295	2.3208		0.282172	0.642623		2.51589	1.14511			0.16789			0.22448		0.400524	0.400524		0.997627	1.13377						LSD2				Interaction	23.94	12
	0.372816		1.07886				0.0853175		0.586356	0.852336		0.180775	0.147184		1.7931	0.29703		2.048	1.44376		0.621881	0.232775		1.3051	2.31977		0.350571	0.431034			0.339688		0.469037	0.469037		1.19391	1.09938						Marf				Row Factor	1.534	1
0.283967	0.590651			0.367647			1.40824		1.28128			0.163435			0.562597			1.93301	1.9159		1.44754	0.81927		0.459703	0.910442		0.64214	0.0856334			0.231776		0.688766	0.688766		1.72578	0.665415						GlyP				Column Factor	20.27	12
0.778065	0.507219		0.623467				0.0746713		0.650442	1.03584		0.091823	0.159211			0.197178		1.76048	2.54701		1.86563	0.744096		0.317781	2.01311		0.810146	0.150711			0.463852		1.03605	1.03605		1.63164	0.925926						Sardh				Residual	219.1	467
0.869281	0.963453		0.71499	1.64358			0.495514		0.955166			0.215994	1.98598			0.389832		0.968864	1.1359		1.44294	1.43144		1.14777	0.424737		1.17049	0.252676			0.469125		1.42717	1.42717		2.70922	2.08741						Ampkα
1.8144	3.27988		0.530657	1.42139			1.32988			1.00803		0.712426				0.248192		3.33616	1.16042		1.18596	1.4675		1.52263	0.47614		1.07989	0.920169			0.476357		0.954495	0.954495		1.8563	0.443439						Ogdh				Difference between row means
0.861804	1.50816			1.33562			2.27188		0.278912			0.57751			0.419255	0.77095					1.40816	1.00992		1.07621	2.60741			0.249635			0.791158		0.313093	0.313093		1.92998	0.456371										Predicted (LS) mean of 3 weeks	1.236
0.63834	0.856719		0.67345				0.548256		0.580701				0.568584		0.376884			1.95852			0.284981			0.796968	1.19012			0.953067			1.54254		0.400683	0.400683		1.2024	1.69322										Predicted (LS) mean of 6 weeks	1.112
1.47092	1.96123		1.56687	1.18973					1.43723	2.37508		0.262454	0.160085					0.753495			0.319069	0.308285		0.203861	0.617352			0.828873			0.865431		0.754516	0.754516		2.90658	0.685714					6w					Difference between predicted means	0.1239
	1.33856			1.19735					1.2652	0.28739		0.123742	1.39526		2.12904			2.95159			1.58075	0.395425			1.0127			1.9292			1.51096		0.236436	0.236436		1.08651	0.246835						+				SE of difference	0.06851
1.26258	2.58128		2.03653	1.55298					1.5588	0.432901		0.312067	1.27795		0.633152						0.155648	1.10631		0.188059				1.29482			2.3389		0.217514	0.217514		2.08265	0.127418						Ald				95% CI of difference	-0.01074 to 0.2585
1.86678	2.24518		2.14795	1.10012					2.1721	1.34394		0.897557	1.14779		1.13333							1.12292		0.804874				2.3702			1.36119		1.05684	1.05684		1.07176	0.12748						AdSL
0.895344	0.578698			1.90838					0.320436	1.13127		0.288288	1.19751								2.12416	1.40239		0.678313				0.279382			1.89466		1.74797	1.74797		2.10168	0.267556						mAcon1				Data summary
1.26799	1.46926		0.693979	1.60177					0.949061	2.34194		1.42036	1.33464								0.422414			0.272526				2.23502			1.7715		0.394529	0.394529		3.22656	0.614258						Nmdmc				Number of columns (Column Factor)	13
0.787453	1.49288			1.08132					1.39178	1.10359		1.37394	1.31114								1.77321			1.31891				1.0834			1.59492					2.8034	0.157877						Gnmt				Number of rows (Row Factor)	2
0.459211	1.3011			0.736961					1.10698	1.04498		0.163399	1.04463								0.472947	1.00723		0.785477							2.2176						0.493067						SdhD				Number of values	493
	2.88095			1.21796						2.74186			1.5771									0.662909		2.05456													1.45346						LSD2
	2.59833			0.727496						1.8897			1.43129									0.461021											1.09693				1.22385						Marf
				0.406149						2.3725												0.711433											3.32308				1.51473						GlyP
				0.660156						1.30923												1.2677											3.53799				1.93507						Sardh
				0.272778						0.31963																							1.07331				0.687613						Ampkα
										0.427356												1.15852											1.82035				0.578227						Ogdh
										0.322828																							1.36805				0.12
																																	0.793275				0.142022
																																	1.49686				0.258142
																																	3.4656				0.0355572
																																	2.71432				0.267258
																																	2.91239				1.51875
																																	0.977357
																																	0.915189
																																	0.599401
																																	1.80806
																																															Table Analyzed	NIGHT SLEEP FRAGMENTATION
Figure 1f
w1118			Ald			AdSL			mAcon1			Nmdmc			Gnmt			SdhD			LSD2			Marf			GlyP			Sardh			Ampkα			Ogdh											Two-way ANOVA	Ordinary
3 w	6w		3 w	6w		3 w	6w		3 w	6w		3 w	6w		3 w	6w		3 w	6w		3 w	6w		3 w	6w		3 w	6w		3 w	6w		3 w	6w		3 w	6w										Alpha	0.05
0.594816	0.372414		0.796866				1.29248		0.652803	0.735632			0.403333		0.855313	0.692442		0.307574			0.865516			1.27439			0.30424			0.520442	0.185593		0.748596	0.748596		0.642676	0.642676					3 W	+
0.496384	0.401325		2.47005	1.96043		0.841759			0.67821	1.09102			1.54663		0.6541	0.384		0.344588	0.230277		0.37719			1.12686			0.287192	0.0548502			0.246985					0.719413	0.719413						Ald				Source of Variation	% of total variation	P value
	0.349198		2.1948			0.999178	1.10833		0.58894	1.10611		0.596675	2.00393		0.753495	0.400417		0.725766	0.642077		0.817945	0.38491		0.995392	0.324215		0.531148	0.778225		0.402957			0.169443	0.169443		0.578504	1.25022						AdSL				Interaction	9.294	<0.0001
1.27248	1.63792		0.453931	2.01038		0.278067	1.14589		0.653742	0.304236		0.421515			0.41442	0.243106		0.485484	0.142407		0.631503	0.379211			0.724515		0.692732	1.02363		1.11851			0.311098	0.311098		0.571618	0.738417						mAcon1				Row Factor	0.4518	0.0784
0.237302	0.337163		3.61797			0.500638				0.911545		0.661811	1.52053		0.419443	0.721943		0.246575			0.977995	0.695321		0.316976	0.590175		0.573022	0.518954		0.257855			0.38361	0.38361			0.463887						Nmdmc				Column Factor	24.33	<0.0001
1.12003	1.25127		1.48347			0.588058						0.707487			0.520049	0.233819		0.557673				0.472679		0.424506	0.723338		0.535234	0.271704			0.578698		0.227318	0.227318		0.727827	0.901406						Gnmt
0.870488	0.825601		2.72418	1.77818						1.32551		0.198124			0.97863			0.2266			0.604102	0.243898		0.900834	0.756301		0.646181	0.20509		1.26685	0.920727		0.378797	0.378797		0.338249	0.289878						SdhD				ANOVA table	SS (Type III)	DF
0.669563	0.771834		1.21205				0.0974116		0.287018			0.162112			0.994586			0.560879	0.646895		0.345133	0.293478		0.983272	0.596137			0.0747711					0.516629	0.516629		1.15845	1.29298						LSD2				Interaction	12.2	12
	0.420785		1.21143				0.623393		0.707924	1.15996		0.178428	0.062608		0.406382	0.182251		0.228209	0.65026		0.174	0.254345		0.279887	0.507837		0.182922	0.386196			0.786713		0.756544	0.756544			0.273645						Marf				Row Factor	0.5929	1
0.283967	0.0810364		2.68242	0.84436			0.733155		0.228627	0.219067		0.421053			0.704335			0.411753	0.357551		0.303704	0.366723		0.235808	0.195468		0.699301	0.138779			0.593154		0.694559	0.694559		1.10947	1.47323						GlyP				Column Factor	31.92	12
0.778065	0.456925		0.904321				0.127566		0.256579	0.405002		0.100104	0.104375		0.624928	0.0296779		0.294912	0.414712		1.22347	0.123917			0.727042		0.850117	0.107057			0.31789		0.252596	0.252596		0.751956	0.73176						Sardh				Residual	86.12	452
0.869281	0.153275		3.0927	1.71273			0.697715		0.382398	1.25185		0.292145	1.22032			0.0683703		0.168066	0.267887		0.706909	0.401912			0.156872		0.99776	0.408497			1.24055		0.245944	0.245944		0.297259	0.0584142						Ampkα
1.8144	0.611188		0.817001	1.47218			0.754394		0.15762	0.536162		0.088744	0.185773		0.221439	0.19941		0.309179	0.583818		0.545967	0.741182		0.373587	0.148441		0.486993	0.302883					0.201119	0.201119		0.617958	1.98238						Ogdh				Difference between row means
0.861804	0.845493		3.19218	1.66263					0.306258	0.342292		0.15	0.176749		1.05035				0.216691		0.776723	0.560002		0.512498				0.469679			0.818406		0.186051	0.186051		1.20227	1.78515										Predicted (LS) mean of 3 weeks	0.6944
0.63834	0.6522		1.67355				0.741512		0.2524			0.070847	0.924424		0.452427			0.520678			0.631026			0.251988	0.32593			0.447184			1.22506		0.282092	0.282092		0.994448	0.372722										Predicted (LS) mean of 6 weeks	0.6158
1.47092	1.82684		3.48521	0.304236					0.212255	0.362681		0.118479	0.631621					0.839222			0.354214	0.145477		0.275624	0.143173			0.494405			0.685572		0.526423	0.526423		0.790514	1.85678					6w					Difference between predicted means	0.07857
	1.45817		2.58798	0.216092					0.682088	0.174087		0.223718	1.67811		0.676154						0.302916			0.860119	0.247738			0.452744			0.817108		0.728403	0.728403		0.356881							+				SE of difference	0.04454
1.26258	1.57343		0.422862	1.48576					0.423505	0.262227		0.234378	0.964754		0.282038			0.654984			0.766807	0.430856		0.212232				0.531169			1.1343		0.212425	0.212425		1.05854							Ald				95% CI of difference	-0.008960 to 0.1661
1.86678	0.780822		1.81051	1.07436					0.320188	0.512725		0.344898	1.17905		0.949652						0.769186	0.690837		0.141583				0.218513			1.13998					0.730898	0.930615						AdSL
0.895344	0.400737		1.32683	0.817076					0.442965	0.607707		0.809364	0.17274		1.02877						1.02008	0.783801		0.290962				0.28892			0.539216					0.452016	0.798752						mAcon1				Data summary
1.26799	1.43682		0.269109	0.264338					0.39823	0.474854		0.169228	1.78723		0.282559						0.651911			0.668896				1.04134			0.831857					1.28014	0.6629						Nmdmc				Number of columns (Column Factor)	13
0.787453	0.77304			0.137131					0.478477	0.280875			0.807412								1.06199			0.746491				0.067817					0.342027				0.86965						Gnmt				Number of rows (Row Factor)	2
0.459211	1.49383			0.383912					0.509615	0.619229			0.234498								0.830956	0.597023		1.24172							0.839688		0.6591										SdhD				Number of values	478
	0.751956			0.378601						1.31852			0.403573									0.402587									2.77984		0.472918				0.625865						LSD2
	0.528971			0.420843						1.0389			1.03411									0.781778									0.94086		0.466805										Marf
				1.64905						0.915199			0.204576																				0.324412				1.43306						GlyP
				0.719804						0.287107			2.07725									0.671271											0.655652				1.85258						Sardh
				0.112656						0.15532			0.308015																				0.542967				0.972853						Ampkα
										0.2713			0.806458									0.617095															0.537611						Ogdh
																						0.826134															0.396255
																																	0.776622				0.0686683
																																	0.984883				0.174446
																																	1.02559				0.0247309
																																	0.514874				0.0790171
																																	0.538255				0.180186
																																	0.814111
																																					0.387972
																																					0.669053
																																															Table Analyzed	TOTAL ACTIVITY
Figure 1g
w1118			Ald			AdSL			mAcon1			Nmdmc			Gnmt			SdhD			LSD2			Marf			GlyP			Sardh			Ampkα			Ogdh											Two-way ANOVA	Ordinary
3 w	6w		3 w	6w		3 w	6w		3 w	6w		3 w	6w		3 w	6w		3 w	6w		3 w	6w		3 w	6w		3 w	6w		3 w	6w		3 w	6w		3 w	6w										Alpha	0.05
588	721		1144.33	465		1111	754		1160.33	408.333		1017.67	833.333		1488.67	531			588			1250.33		1070	1084.33		828.667	537			465.333		1109.33	723.667		1478	748					3 W	+
693.333	521.667		843.333	638		775.333	363.333		771.333	803		1076.33	569.333			221.333		784.333	547.667		591.667	292			971		359	194		894	648		571.333	448		867.667	542.667						Ald				Source of Variation	% of total variation	P value
697.667	462.333		485.333	258		965.667	1258.33			772.333		518.333	701.333		1064.33	225		478.333	785.333		1440.33	389.333		1314.33	309.333		585.667			1103.67				644.333		1012	486.333						AdSL				Interaction	9.585	<0.0001
725.667	1023.67		1116.67	423.667		968	1439		1271	280.333		724.667			864.667	313		544.667	293		1045.67	291.667		1169.33	861.333		850				920.333		1083	193.333		774.667	588.667						mAcon1				Row Factor	5.997	<0.0001
577.333	767.333		668.333	414.333		778.667	426.667		904	971.333		670.333	971.333		939.333	424.333		651.333			1232.33	444			493.333		1011	595.667		937			907.667	563		623.667	508						Nmdmc				Column Factor	10.3	<0.0001
1021.33	1497		691.667	289.667					874.333	1178.67		550.667			1436.67			632			449	609.667		727	908.333		695.667	346.667		1254	1025.33		1103.67	706		660.333	779.333						Gnmt
1087	1291		607.333	666.667		877.667			1034.33	1399		644.333			1568.67			559.333	309.333		701.333	829			435		453	184		965.667	592		1296	381.667		791	392.333						SdhD				ANOVA table	SS (Type III)	DF
713.667	874		1118	458.667			514.667		640	815.333		560.333			982	411.667		840.333	943		907	803.333		1060.67	387.333		1615	248.333			1028		489.667	283.333		548							LSD2				Interaction	5697234	12
825.667	395.333		765				220.333		273.333	404.667		251.333	385		995	504.667		573.333	472.667		541	1211.33		201.333	593.333		427.667	529.333			1249.33		418	158.667		1087.33	663.333						Marf				Row Factor	3564960	1
884.333	514.667		375	903.333			981.333		263.333	163.333		145.667	132.333		412.667	227		484	529.333		675.667	1386.33		932	328.333		1067.33	266			513		379	881.667		1182	206.667						GlyP				Column Factor	6120971	12
687.667	680.667		1376	318			336.667		351.333	410.333		362.333	263		512	471.667		574.333	709.667					876.667	489		526.667	289.667			284.333		264.333	325.333		873.667	922.667						Sardh				Residual	44527385	478
888.667	633.667		878.333	681.667			649.667			289.333		440.667	839		311	472		394.333	454		1457.67	396.333			155		996	258.667					842.667	340.667		1502							Ampkα
883	1224		898.333	691.667			754		393.333	278.667		289	221		370.333	544.667		710.667	1081.67		676.333	1002		296.667	197.667		1419.33	793.333			921.333		385.333	156.333		652.667	754.333						Ogdh				Difference between row means
543	986		300	1005.67			876		252	118		381.333	275		978				210		1365.67	990.667		617.667	967.333			454			643		580.667	631.667		639.667	604.667										Predicted (LS) mean of 3 weeks	789.9
1052.33	1003.67			223.667			611.667		770.667			164	590.333		483.667			980.333			531.333	842.333		213.667	826.667			511.333			955		153.333	289.333			988.667										Predicted (LS) mean of 6 weeks	604.8
849	1609.33		699	366					482.333	995.333		447	413		1362			382.667			706.667	489.667		465.333	620			320			649		327.333	617		1641.67	737					6w					Difference between predicted means	185.1
1071.33			1323.33	393.333					549.667	277.333		453.333	547.333		1217.67			883				378.667		329	522			553			310.667		399	368.333		1179.67	284.667						+				SE of difference	29.93
1038.33	1509.67		804	1001.33					981	165.333		181	1313.67		668.667			379.333			519.333	742		289.333				391			912.667		283.333	261		1401.33	237.667						Ald				95% CI of difference	126.3 to 243.9
1537.67	1001.67		1082.33	659					546.333	374		708.333	1112.67		1079.67						730			357.667				473.333			1361.67		391.333			1051	183.333						AdSL
1508.67	734		1095.33						300.333	733		312.667	405.667		775						699.667	702		298.667				256.333			276.333		297.667			941.667	290.667						mAcon1				Data summary
738	1130.33		337.333	895.667					581.333	1290		623.667			732						669.667	828.333		423				827			678.333		554.333			1037	510.667						Nmdmc				Number of columns (Column Factor)	13
1379	632.333			403.333					468.333	635.667		659.333	966.333								866.667	1151.67		279.333				585.667			1275		1199.67			1358.67	273.667						Gnmt				Number of rows (Row Factor)	2
	528.667			249						767		253.667	607								658	307		847.333							488		754				343.667						SdhD				Number of values	504
	705.333			559.667						693			333.333									1335.67									686.667						469.333						LSD2
	844.333			365						558.333			728.667									866.667															536						Marf
				674						1094			880.333									353.667															718.333						GlyP
				306.667						1181.33			1337.33									1150.33															632.333						Sardh
				603.333						196.667			550.667																								247						Ampkα
										284.667			622.667									1173.33															306.667						Ogdh
										315			643.333									1489.67															295
																																					132
																																					350
																																					190.667
																																					152.667
																																					210.667
																																					504
																																															Table Analyzed	DAY ACTIVITY
Figure 1h
w1118			Ald			AdSL			mAcon1			Nmdmc			Gnmt			SdhD			LSD2			Marf			GlyP			Sardh			Ampkα			Ogdh											Two-way ANOVA	Ordinary
3 w	6w		3 w	6w		3 w	6w		3 w	6w		3 w	6w		3 w	6w		3 w	6w		3 w	6w		3 w	6w		3 w	6w		3 w	6w		3 w	6w		3 w	6w										Alpha	0.05
247	529		800	266		366	412			260		377.667	707		840	298.667			303.667			192		557.667	397		579.333	214.333			139			323.667		588.667	346.667					3 W	+
315	366.667		670.333	233.333		403.333	202.667		482	559.333		402	333.333			113		359	359.333		312	113.333			425.333		178.667	53		463.667	212			287.333		609	328.667						Ald				Source of Variation	% of total variation	P value
423.333	312		269	133		511.333	521			470.667		173.667	350		786.667	93.6667		205.667	434		506.333	114			122		406.667	574.667		293			246	227		807	332						AdSL				Interaction	13.83	<0.0001
433.333	547.333		567.333	217.667		641				168.333		298.667	55.3333		616.667	135.667		155.667	209		605	333		666.333	450		497	496		580.333	511.667		499	456		513	291.333						mAcon1				Row Factor	1.61	0.002
188.333	498.667		350.667	191		353.667	252.333		442.333	624.667		267.667	532		630	157.333		410			498	647			337.667		427.667	400.333		584.667			186	551.667		319	368.333						Nmdmc				Column Factor	5.374	0.0016
464			530.667	161.667		466.667			421.667	659.333		369.333			951.667	342.333		341				583		537.667	273.333		343.333	146.333		716	611.667		350.667	408.667		469	549						Gnmt
410.333	772.333		283.333	468.667		468				741		553						242.333	218.333		331.333	785.333			152		276.333	101		489.333	288		141	217.667		568	253						SdhD				ANOVA table	SS (Type III)	DF
409.333	540.667		682.667	222.667			460.667		160	491.333		376.333			375.333	286		464	599.333		278.333	814		556	168.667		938.333	115.333			507.333		231.333	85.3333		334.667	535						LSD2				Interaction	2638902	12
215	210.667		445.667				115.333		494.333	239		160.667	278		517.333	251.667		358.667	294		284.333			107.667	465.333		273.667	236			459.333		180	507		451.333	350						Marf				Row Factor	307143	1
442	261		188.333	471.667			666.667		231.667			64.6667	100.333		132.333	147		218.333	365.333		424.667	201.333		614	193.333		699	131.667			267.333		123.333	343		690	127						GlyP				Column Factor	1025193	12
195.667	276.333		563	188.333			178		186	288.333		189	178.333		218.667	237.333		343	508			684		403.333	248.667		272.333	146.333			146.333		354.667	308.667		497.667	453						Sardh				Residual	15373395	484
528	309		464	294			311		83			200	273.333		161	228.333		218.333	320			406.333		275.333	79.3333		560.667	116.667			722.333		292										Ampkα
532.333	635.667		592	371.333			523.667		195	135		159	120		148	159.667		419.667	434		262.333	512		150.667	89		1060	566.333			510.667		233.333			500	539						Ogdh				Difference between row means
175.333	679.667			522			521					201.667	171.333		227.333			51	104.667		380	232		376	520.667			175.667			340.333		362	386.667		378	394.333										Predicted (LS) mean of 3 weeks	399
355.333	437						340		111.667			28.3333	250.333		127.333			382.667			275.667	277.333			573						503		158.333	419			577.333										Predicted (LS) mean of 6 weeks	345.6
354.333	695		402	207.667					129	488.667		317.333	168.333		799.667			136.667			335.333	336.667			451.333			134			427.333			427.667			375.333					6w					Difference between predicted means	53.41
385.667			611.667	284.333					527.333	135.333		188.667	320.333		786			465.333				842.333		67	341			337.333			144.667		162	281		592.333	172.667						+				SE of difference	17.18
449.333	479		519	377					163.333			97	852.667		499			111.667			229.333	198.333		157.667				232			547.667		193.333	189.333		864.667	160.667						Ald				95% CI of difference	19.66 to 87.16
627.667	373		522	430.333					309.667	227		537.333	553		536.667						430.667	317.667		156				366.333					127.333	155		274.333	112.667						AdSL
589.333	304		573.667						548.667	363.333		143.667	310.333		152.667						345.333	689.333		78.6667				95			146.667		172.333	139.333		576.333	158						mAcon1				Data summary
297.333	485.667		207.333	230					211			360.333	798.667		295						321.333	58.3333		206.667				436.333			471.667		311	85.3333		497.667	329						Nmdmc				Number of columns (Column Factor)	13
453.667	230			148					153	426.333		431	721								397	833.333		113.333				480.667			677.667		485	236.333		835.333	183.333						Gnmt				Number of rows (Row Factor)	2
	155.333			409					314.667	441.667		160	447								196.667	601		460.333							235		149.667	432			205						SdhD				Number of values	510
	387.667			170.667					249.667	399.667			184.333									70									460.667			325.333			234						LSD2
	369.333			376.667						315			457.333									601											370.667				295						Marf
				183						490.667			765.667									1049.33											767.333				483.667						GlyP
				418						605.333			665.333									760.333											529				421.333						Sardh
													398									942.333											445.667				60						Ampkα
										176.667			371.333																				704				257.333						Ogdh
													306.333																				132.667				198
																																	116				96.6667
																																	331				248
																																	544.333				110
																																	422.667				93.6667
																																	358.333				91
																																	326.667				327.667
																																	375.667
																																	109.667
																																	457.667
																																	225.667
																																															Table Analyzed	NIGHT ACTIVITY
Figure 1i
w1118			Ald			AdSL			mAcon1			Nmdmc			Gnmt			SdhD			LSD2			Marf			GlyP			Sardh			Ampkα			Ogdh											Two-way ANOVA	Ordinary
3 w	6w		3 w	6w		3 w	6w		3 w	6w		3 w	6w		3 w	6w		3 w	6w		3 w	6w		3 w	6w		3 w	6w		3 w	6w		3 w	6w		3 w	6w										Alpha	0.05
341	192		344.333	199			342		391.333	148.333			126.333		648.667	232.333		367	284.333			446.333		512.333			249.333	322.667		603.333	326.333		430.667	307.667			401.333					3 W	+
378.333	155		173	404.667		372	160.667		289.333	243.667			236		696	108.333		425.333	188.333		279.667	128.333					180.333	141		430.333	436		358	334.667		258.667	214						Ald				Source of Variation	% of total variation	P value
274.333	150.333		216.333	125		454.333				301.667		344.667	351.333		277.667	131.333		272.667	351.333			197.333		499.333	187.333		179	435.667					206.333	244.333		205	154.333						AdSL				Interaction	4.844	0.0014
292.333	476.333		549.333	206		327	489.333		551	112		426	0		248	177.333		389	84		440.667	178.333		503			353				408.667			378.333		261.667	297.333						mAcon1				Row Factor	8.81	<0.0001
389	268.667		317.667	223.333		425	174.333		461.667	346.667		402.667	439.333		309.333	267		241.333			734.333	330			155.667		583.333	195.333		352.333			305			304.667	139.667						Nmdmc				Column Factor	14.44	<0.0001
557.333	608		161	128					452.667	519.333		181.333			485	474.333		291			410	276.667		189.333			352.333	200.333		538	413.667		288	338.333		191.333	230.333						Gnmt
378.333	518.667		324	198		409.667				658		91.3333			436.667			317	91		370	182			283		176.667	83		476.333	304		338.667	362		223	139.333						SdhD				ANOVA table	SS (Type III)	DF
676.667	333.333		435.333	236			54		94	324		184			606.667	125.667		376.333	343.667		628.667	220.333		504.667	218.667		676.667	133			520.667		197.667	210.667		213.333							LSD2				Interaction	656696	12
304.333	184.667		319.333				105		540	165.667		90.6667			477.667	253		214.667	178.667		256.667	426		93.6667	128		154	293.333					377			636	313.333						Marf				Row Factor	1194424	1
610.667	253.667		186.667	431.667			314.667		408.333	123.333		81	107		280.333	80		265.667	164		251	572.333		318	135		368.333	134.333			245.667		405.333	348.333		492	79.6667						GlyP				Column Factor	1957948	12
442.333	404.333			129.667			158.667		87.3333	122		173.333	32		293.333	234.333		231.333	201.667		768.667	570		473.333	240.333		254.333	143.333			138		136.667	283.333		376							Sardh				Residual	9696108	482
492	324.667		414.333	387.667			338.667		180.333	250.667		240.667	84.6667		150	243.667		176	134		705.667	195			75.6667		435.333	142					324.667	388.333		550.333							Ampkα
360.667	588.333		306.333	320.333			230.333		156.333	143.667		130	565.667		222.333	385		291			414	318		146	108.667		359.333	227			410.667		372.667	266.333		152.667	215.333						Ogdh				Difference between row means
350.667	306.333		204.667				355		62.3333	100.333		179.667	101		750.667			134.667	105.333			584.333		241.667				278.333			302.667		369	192.333		261.667	210.333										Predicted (LS) mean of 3 weeks	361.7
367.667	566.667		589	162.667			271.667		281.667			135.667	103.667		356.333						255.667	330.333		160	253.667			181.667			452		283.333	287.333			411.333										Predicted (LS) mean of 6 weeks	252.9
697			297	158.333					123	506.667		129.667	340		562.333			246			371.333	257.667		412.667	168.667			186			221.667		97.6667	185		545.667	361.667					6w					Difference between predicted means	108.8
494.667				109					243.333	142		264.667	244.667		431.667			417.667			710.667	101.333		262	181			215.667			166		189	132		587.333	112						+				SE of difference	14.12
685.667			285						319	86.3333		84	227		169.667			267.667			290	405.333		131.667				159			365		143	126.333		536.667	77						Ald				95% CI of difference	81.08 to 136.6
589	628.667		560.333	228.667					240	147		171	461		543						299.333			201.667				107			485.667		166.667	122			70.6667						AdSL
	430		521.667						432.333	369.667		169	559.667		622.333						354.333	503.667		220				161.333			129.667		194.667	64		365.333	132.667						mAcon1				Data summary
	644.667		130	154					335.333	423.333		263.333	95.3333		437						348.333	510.667		216.333				390.667			206.667		335.667	182.667		539.333	181.667						Nmdmc				Number of columns (Column Factor)	13
440.667	402.333			173.333					147.333	209.333		228.333									469.667	462.333		166				105					370.667	351		523.333	90.3333						Gnmt				Number of rows (Row Factor)	2
	373.333			101					266.667	325.333		93.6667	245.333								461.333	248.667		387							253		125	331.667			138.667						SdhD				Number of values	508
	317.667			150.667					218.667	293.333			160									502.333									226						235.333						LSD2
	475			194.333						243.333			149									265.667															241						Marf
				297.333						603.333			271.333									283.667											306.667				234.667						GlyP
				123.667						576			114.667									549.333											448.667				211						Sardh
				185.333						119.333			672									601.667											522				187						Ampkα
										108			152.667									413											902.667				49.3333						Ogdh
										248.333			251.333									547.333											311.667				97
													337																				723.667				35.3333
																																	325.333				102
																																	438				80.6667
																																					59
																																	876				119.667
																																	676				176.333
																																	532.667
																																	729.667
																																	614.667
																																	514
																																															ANOVA summary
																																															F	34.01
																															3 W											w1118					P value	<0.0001
																																										Sh[mns]					P value summary	****
																																															Significant diff. among means (P < 0.05)?	Yes
																															5W											w1118					R squared	0.6539
																																										Sh[mns]
																																															ANOVA summary
																															3 W											w1118					F	15.82
																																										Sh[mns]					P value	<0.0001
																																															P value summary	****
																															5W											w1118					Significant diff. among means (P < 0.05)?	Yes
																																										Sh[mns]					R squared	0.4678
																																															ANOVA summary
																																															F	15.32
																															3 W											w1118					P value	<0.0001
																																										Sh[mns]					P value summary	****
																																															Significant diff. among means (P < 0.05)?	Yes
																															5W											w1118					R squared	0.4597
																																										Sh[mns]
																																															ANOVA summary
																															3 W											w1118					F	23.22
																																										Sh[mns]					P value	<0.0001
																																															P value summary	****
																															5W											w1118					Significant diff. among means (P < 0.05)?	Yes
																																										Sh[mns]					R squared	0.5633
[truncated: 9 more columns]

## Sheet: Fig 2
																																										3 W	+				Table Analyzed	ELAVII>KDGENES_M
Figure 2a																																											Ald
w1118			Ald			AdSL			mAcon1			Nmdmc			Gnmt			SdhD			LSD2			Marf			GlyP			Sardh			Ampkα			Ogdh							AdSL				Two-way ANOVA	Ordinary
3 w	6w		3 w	6w		3 w	6w		3 w	6w		3 w	6w		3 w	6w		3 w	6w		3 w	6w		3 w	6w		3 w	6w		3 w	6w		3 w	6w		3 w	6w						mAcon1				Alpha	0.05
4.31	3.78		3.33	2.75		5.71	4.67		5.64	4.44		5.2	6		3.25	1.4		2.6	2.71		4	2.13		4	1.75		5.14	4		3.76	2.6		4	3.14		5.63636	2.42857						Nmdmc
4.92	4.55		5.2	4.8		5.83	4.29		4	4.14		4.67	4.44		4.6	2.44		3.45	1.67		4.86	3.88		3.6	2		4.67	5.5		4.33	3.56		3.69	4		4.88	3.33						Gnmt				Source of Variation	% of total variation	P value
5	5.14		5.78			5.5	3.5		4.43	4		4.33	5		4.13	1.69		2			5.14	3.13					4.59			4.8	3.83		4.27	3.43		5	3.75						SdhD				Interaction	11.83	0.0317
4.17	3.71																																			5.8							LSD2				AGE	19.14	<0.0001
4.15	3.27																																										Marf				GENOTYPE	42.57	<0.0001
6																																											GlyP
																																											Sardh				ANOVA table	SS (Type III)	DF
																																											Ampkα				Interaction	11.64	12
																																											Ogdh				AGE	18.83	1
																																															GENOTYPE	41.87	12
																																															Residual	24.35	53
																																										6w
																																											+				Difference between row means
																																											Ald				Predicted (LS) mean of 3 weeks	4.476
																																											AdSL				Predicted (LS) mean of 6 weeks	3.468
																																											mAcon1				Difference between predicted means	1.008
																																											Nmdmc				SE of difference	0.1574
																																											Gnmt				95% CI of difference	0.6921 to 1.324
																																											SdhD
																																											LSD2				Data summary
																																											Marf				Number of columns (GENOTYPE)	13
																																											GlyP				Number of rows (AGE)	2
																																											Sardh				Number of values	79
																																											Ampkα
																																											Ogdh
																																										3 W	+				Table Analyzed	ELAVII>KDGENES_F
Figure 2b																																											Ald
w1118			Ald			AdSL			mAcon1			Nmdmc			Gnmt			SdhD			LSD2			Marf			GlyP			Sardh			Ampkα			Ogdh							AdSL				Two-way ANOVA	Ordinary
3 w	6w		3 w	6w		3 w	6w		3 w	6w		3 w	6w		3 w	6w		3 w	6w		3 w	6w		3 w	6w		3 w	6w		3 w	6w		3 w	6w		3 w	6w						mAcon1				Alpha	0.05
4.86	2.5		4.18	1		5.8	5.33		5.5	5.2		6	5.71		5.14	3.23		5.33	2		4.2	3.12		6	3		4	4.67		5.14	2.67		5.87	2.92		5.8	5.5						Nmdmc
5	5.45		4	4.55		4.91	4		4.67	5.2		6	5.33		4.44	3.5		3.33	2		5	3		4.8	3.43		5.87	3.89		4.83	3.2		6	4.5		5.6	4.3						Gnmt				Source of Variation	% of total variation	P value
4.43	3.75		5.25	5.33		5.33	4.44		4.29			4.89			4.18	3.4		2.4			4.2	4.57		6			4	4.25		5.14	4.15		4.33	4.35		5.3	4.5						SdhD				Interaction	8.585	0.4573
4.29	2.33																																			5							LSD2				AGE	19.27	<0.0001
4.14	3																																										Marf				GENOTYPE	32.14	0.0004
4.5	3																																										GlyP
																																											Sardh				ANOVA table	SS (Type III)	DF
																																											Ampkα				Interaction	8.319	12
																																											Ogdh				AGE	18.68	1
																																															GENOTYPE	31.15	12
																																															Residual	37.95	55
																																										6w
																																											+				Difference between row means
																																											Ald				Predicted (LS) mean of 3 weeks	4.895
																																											AdSL				Predicted (LS) mean of 6 weeks	3.902
																																											mAcon1				Difference between predicted means	0.9927
																																											Nmdmc				SE of difference	0.1908
																																											Gnmt				95% CI of difference	0.6103 to 1.375
																																											SdhD
																																											LSD2				Data summary
																																											Marf				Number of columns (GENOTYPE)	13
																																											GlyP				Number of rows (AGE)	2
																																											Sardh				Number of values	81
																																											Ampkα
																																											Ogdh
																																										3 W	+				Table Analyzed	FLN>KDGENES_M
Figure 2c																																											Ald
w1118			Ald			AdSL			mAcon1			Nmdmc			Gnmt			SdhD			LSD2			Marf			GlyP			Sardh			Ampkα			Ogdh							AdSL				Two-way ANOVA	Ordinary
3 w	6w		3 w	6w		3 w	6w		3 w	6w		3 w	6w		3 w	6w		3 w	6w		3 w	6w		3 w	6w		3 w	6w		3 w	6w		3 w	6w		3 w	6w						mAcon1				Alpha	0.05
5.53	4.13		3.62	1.47		5.6	2		2.77	2.33		4.25	3.71		5.5	2		3.04	2.33		2.82	2.13		4.73	3.2		5.5	3		4.33	4		3.27	1.5		0	0						Nmdmc
4.5	3.38		4	0.8		3.14	0.31		1.87	1		4.89	4		5.6	3.55		3.25	3.57		4.1	3.88		5.33	3.78		3.6	2.6		4.47	3.76		5	2.5		0	0						Gnmt				Source of Variation	% of total variation	P value
5.5	3.56		4.63	0.97		4	0.5		3.06	1.11		5	3		5.81	1.43		3.8	3.05		2.84	3.13		3.82	3.67		3.25			4.29			3.77	1.85		0	0						SdhD				Interaction	11.28	<0.0001
5.45	4.14																																			0							LSD2				AGE	18.9	<0.0001
5.86																																											Marf				GENOTYPE	54.55	<0.0001
3.6																																											GlyP
																																											Sardh				ANOVA table	SS (Type III)	DF
																																											Ampkα				Interaction	23.96	12
																																											Ogdh				AGE	40.14	1
																																															GENOTYPE	115.9	12
																																															Residual	25.08	55
																																										6w
																																											+				Difference between row means
																																											Ald				Predicted (LS) mean of 3 weeks	3.851
																																											AdSL				Predicted (LS) mean of 6 weeks	2.416
																																											mAcon1				Difference between predicted means	1.435
																																											Nmdmc				SE of difference	0.1529
																																											Gnmt				95% CI of difference	1.128 to 1.741
																																											SdhD
																																											LSD2				Data summary
																																											Marf				Number of columns (GENOTYPE)	13
																																											GlyP				Number of rows (AGE)	2
																																											Sardh				Number of values	81
																																											Ampkα
																																											Ogdh
																																										3 W	+				Table Analyzed	FLN>KDGENES_F
Figure 2d																																											Ald
w1118			Ald			AdSL			mAcon1			Nmdmc			Gnmt			SdhD			LSD2			Marf			GlyP			Sardh			Ampkα			Ogdh							AdSL				Two-way ANOVA	Ordinary
3 w	6w		3 w	6w		3 w	6w		3 w	6w		3 w	6w		3 w	6w		3 w	6w		3 w	6w		3 w	6w		3 w	6w		3 w	6w		3 w	6w		3 w	6w						mAcon1				Alpha	0.05
6	4		4.77	2		5.18	2.5		4.33	3		3.4	3		4.22	1.56		4.12	2.75		4.78	3.12		3.78	3.5		5.33	3.45		5.5	3.89		3.8	1		0	0						Nmdmc
3.76	4.5		4.4	3.78		4.93	2.67		3.33	1.29		4.6	3.67		5.5	2		2.8	3.25		4	3		5.33	3.33		4	4.25		4	3.5		4.44	1.78		0	0						Gnmt				Source of Variation	% of total variation	P value
4.67	3.43		4.77			4.5	1.83		4.15			4.5	4.44		5.64	3.4		2.55	2		3.2	3.57		3.45	2.75		4.33			5			4	2.33		0	0						SdhD				Interaction	8.086	0.0048
4.6	3.6														5.12			3.15667																		0							LSD2				AGE	18.5	<0.0001
5.6	2.5																																										Marf				GENOTYPE	56.13	<0.0001
4.17	3.27																																										GlyP
																																											Sardh				ANOVA table	SS (Type III)	DF
																																											Ampkα				Interaction	14.54	12
																																											Ogdh				AGE	33.28	1
																																															GENOTYPE	100.9	12
																																															Residual	24.85	57
																																										6w
																																											+				Difference between row means
																																											Ald				Predicted (LS) mean of 3 weeks	4.026
																																											AdSL				Predicted (LS) mean of 6 weeks	2.714
																																											mAcon1				Difference between predicted means	1.313
																																											Nmdmc				SE of difference	0.1502
																																											Gnmt				95% CI of difference	1.012 to 1.613
																																											SdhD
																																											LSD2				Data summary
																																											Marf				Number of columns (GENOTYPE)	13
																																											GlyP				Number of rows (AGE)	2
																																											Sardh				Number of values	83
																																											Ampkα
																																											Ogdh
																																										3 W	+				Table Analyzed	ELAVII>KDGENES_geotaxis_M
Figure 2e																																											Ald
w1118			Ald			AdSL			mAcon1			Nmdmc			Gnmt			SdhD			LSD2			Marf			GlyP			Sardh			Ampkα			Ogdh							AdSL				Two-way ANOVA	Ordinary
3 w	6w		3 w	6w		3 w	6w		3 w	6w		3 w	6w		3 w	6w		3 w	6w		3 w	6w		3 w	6w		3 w	6w		3 w	6w		3 w	6w		3 w	6w						mAcon1				Alpha	0.05
87.5	63.889		58.333	37.5		30	50		40	83.3333		92.5	91.6667		8.33333			52.5	12.5		41.6667	45.4545		22.5	12.5		60	81.25		45	60		82.5	73.0769		50	47.5						Nmdmc
75	58.333		80.556			40	53.125		3.125			88.8889	83.3333		85	44.4444		50			65	50		50	37.5		90			62.5	80.5556		67.5	62.5		82.5	20						Gnmt				Source of Variation	% of total variation	P value
	50		97.5			65.625			37.5			50			35			46.4286			57.5						88.8889			20						50							SdhD				Interaction	22.48	0.0696
	52.273																																										LSD2				AGE	1.207	0.2756
																																											Marf				GENOTYPE	42.38	0.0016
																																											GlyP
																																											Sardh				ANOVA table	SS (Type III)	DF
																																											Ampkα				Interaction	7810	12
																																											Ogdh				AGE	419.5	1
																																															GENOTYPE	14724	12
																																															Residual	11616	34
																																										6w
																																											+				Difference between row means
																																											Ald				Predicted (LS) mean of 3 weeks	57.74
																																											AdSL				Predicted (LS) mean of 6 weeks	52.04
																																											mAcon1				Difference between predicted means	5.698
																																											Nmdmc				SE of difference	5.143
																																											Gnmt				95% CI of difference	-4.753 to 16.15
																																											SdhD
																																											LSD2				Data summary
																																											Marf				Number of columns (GENOTYPE)	13
																																											GlyP				Number of rows (AGE)	2
																																											Sardh				Number of values	60
																																											Ampkα
																																											Ogdh
																																										3 W	+				Table Analyzed	ELAVII>KDGENES_Geotaxis_F
Figure 2f																																											Ald
w1118			Ald			AdSL			mAcon1			Nmdmc			Gnmt			SdhD			LSD2			Marf			GlyP			Sardh			Ampkα			Ogdh							AdSL				Two-way ANOVA	Ordinary
3 w	6w		3 w	6w		3 w	6w		3 w	6w		3 w	6w		3 w	6w		3 w	6w		3 w	6w		3 w	6w		3 w	6w		3 w	6w		3 w	6w		3 w	6w						mAcon1				Alpha	0.05
65	18.75		36.364	58.333		42.5	56.25		25	35		75	83.3333		22.5	40		28.125	3.125		50	43.75		45	35.5		35.7143	66.6667		57.1429	57.1429		71.875	37.5		27.5	28.125						Nmdmc
57.143	68.75		72.5	45.4545		70.455			8.33333			77.5	92.8571		75	25		44.4444			87.5	53.5714		21.4286	18.5					66.6667	50		54.5455	52.5		69.4444	37.5						Gnmt				Source of Variation	% of total variation	P value
37.5	58.333		59.375			59.375			35.7143			82.5			35			40.625			60									37.5						42.8571							SdhD				Interaction	9.91	0.6576
	55																																										LSD2				AGE	1.04	0.3259
																																											Marf				GENOTYPE	53.58	0.0005
																																											GlyP
																																											Sardh				ANOVA table	SS (Type III)	DF
																																											Ampkα				Interaction	2322	12
																																											Ogdh				AGE	243.8	1
																																															GENOTYPE	12555	12
																																															Residual	8090	33
																																										6w
																																											+				Difference between row means
																																											Ald				Predicted (LS) mean of 3 weeks	49.87
																																											AdSL				Predicted (LS) mean of 6 weeks	45.44
																																											mAcon1				Difference between predicted means	4.426
																																											Nmdmc				SE of difference	4.439
																																											Gnmt				95% CI of difference	-4.604 to 13.46
																																											SdhD
																																											LSD2				Data summary
																																											Marf				Number of columns (GENOTYPE)	13
																																											GlyP				Number of rows (AGE)	2
																																											Sardh				Number of values	59
																																											Ampkα
																																											Ogdh
[truncated: 9 more columns]

## Sheet: Fig 3
															3 W	+		Table Analyzed	TOTAL SLEEP						Šídák's multiple comparisons test	Predicted (LS) mean diff.	95.00% CI of diff.	Below threshold?	Summary	Adjusted P Value
Figure 3a																Ampkα OE
w1118			Ampkα OE			Ampkα			Dead SNF1AOE			SNF1A OE				Ampkα		Two-way ANOVA	Ordinary						3 WEEKS:+ vs. 3 WEEKS:Ampkα OE	198.6	46.38 to 350.8	Yes	**	0.0021
3 w	6w		3 w	6w		3 w	6w		3 w	6w		3 w	6w			Dead SNF1AOE		Alpha	0.05						3 WEEKS:+ vs. 3 WEEKS:Ampkα	-95	-213.2 to 23.16	No	ns	0.2458
1057.67	1050.67		428	1337		835	1008		966.667	665.333		1193	721			SNF1A OE									3 WEEKS:+ vs. 3 WEEKS:Dead SNF1A OE	45.11	-74.61 to 164.8	No	ns	0.9925
1132.67	1108.67		327.667	775.667		872.333			1108	1188.33		978	759.667					Source of Variation	% of total variation	P value	P value summary	Significant?			3 WEEKS:+ vs. 3 WEEKS:SNF1AOE	-96.06	-217.5 to 25.39	No	ns	0.2688
1109	1211		1333.67	1004.67		948.667	1161.67		981.667	858		1090.33	1228		6w	+		Interaction	3.862	0.0128	*	Yes			3 WEEKS:+ vs. 3 WEEKS:SNF1AOE	-96.06	-217.5 to 25.39	No	ns	0.2688
1129.67	963.667		701			958.333	1021.33		1149.33	846		1155.67	1093.33			Ampkα OE		AGE	1.412	0.0304	*	Yes			6 WEEKS:+ vs. 6 WEEKS:Ampkα OE	-31.92	-211.7 to 147.8	No	ns	>0.9999
1219.33	1099.33		791.333	1157.67		1110	734.667		660.333	883		1005.33	824.333			Ampkα		GENOTYPE	8.931	<0.0001	****	Yes			6 WEEKS:+ vs. 6 WEEKS:Ampkα	-74.16	-192.2 to 43.91	No	ns	0.6461
1069.33	838		561.667	1290		919.333			1012.67			785	1084.33			Dead SNF1AOE									6 WEEKS:+ vs. 6 WEEKS:Dead SNF1A OE	-34.98	-155.7 to 85.77	No	ns	0.9996
997.333	988.333		267.667	872.333		1229.67	1155.67		866.333	576.667		1168.33	1245.67			SNF1A OE		ANOVA table	SS (Type III)	DF	MS	F (DFn, DFd)	P value		6 WEEKS:+ vs. 6 WEEKS:SNF1AOE	-86.46	-231.4 to 58.47	No	ns	0.7235
947.667	1022.67		1095.33	765		1194.67	1108.33		709.333	937		1145	1250.67					Interaction	372685	4	93171	F (4, 283) = 3.238	P=0.0128		6 WEEKS:+ vs. 6 WEEKS:SNF1AOE	-86.46	-231.4 to 58.47	No	ns	0.7235
1088.33	968		330.667	821		1164	1349.33		1161	871.333		1025.33	1176					AGE	136222	1	136222	F (1, 283) = 4.734	P=0.0304		3 WEEKS:+ vs. 6 WEEKS:+	8.464	-110.5 to 127.4	No	ns	>0.9999
1090.67	713		1172	958.333		1197.67	886.667		961.333	1200		1177.67	957.333					GENOTYPE	861824	4	215456	F (4, 283) = 7.488	P<0.0001		3 WEEKS:Ampkα OE vs. 6 WEEKS:Ampkα OE	-222	-425.3 to -18.73	Yes	*	0.0207
990			1034.67	1088.67		1212	1058.33		975.667	1186		1174.67	1080					Residual	8142699	283	28773				3 WEEKS:Ampkα vs. 6 WEEKS:Ampkα	29.3	-88.00 to 146.6	No	ns	>0.9999
1079.33			797			1102.33	1149.67		1085	1270.33		1126.33	1087.67												3 WEEKS:Dead SNF1A OE vs. 6 WEEKS:Dead SNF1A OE	-71.63	-193.2 to 49.91	No	ns	0.7404
1076.67			1078			1154.67	895		813.333	857		872.667	988					Difference between row means							3 WEEKS:SNF1AOE vs. 6 WEEKS:SNF1AOE	18.06	-128.9 to 165.1	No	ns	>0.9999
1108	854.333		933.333			1051.33	771		522	954		978.667	1041.67					Predicted (LS) mean of 3 WEEKS	973.1
1081	1052		651			1166	966.333		1021.67	1025		669.667	1243.67					Predicted (LS) mean of 6 WEEKS	1021
991.333	849.667		1057			1365.67	1028.33		842.333	1141		790	1277					Difference between predicted means	-47.57
892.667	1116.67					1188.33	999.667		552.333	675		901	990.667					SE of difference	21.86
874	1057.33					1219.67	1114		1019	999.333		1121.33	1059.33					95% CI of difference	-90.60 to -4.536
879	1034.67					1282.67	1169.67		1139.33	1069.33
	958					1255.67	1198.67		776	947.667		1063.33						Data summary
945.667	1251					998.333	1221.33		1139.67	1201.67		1199.67						Number of columns (GENOTYPE)	5
993	1113.33					919.333	1335.67		956.667	1198		1138						Number of rows (AGE)	2
947	1153					1298.67	1104.67		737.333	892.333		1352.33						Number of values	293
	1078.33						962		938	1227.67		1199.67
	1056.33					1097	1038		800.667	1041.67		1039
849.333	985.667					918.667	1159.33		976.333	962.667		1311
764.333	871.333					934.333	1026.67		679.333	1000.33		882.667
746.333	918					1033.67	1206.33		933.667	1013		1045.67
799.667	916.333					1010	987.667		1155.33	861		1211
951	650.667					1067	921.667		1099.33	1277		1134.67
794.667	1018.67					1139	991		974	1102.33		1278.33
888.333	1049					1030.67	971.333		928.333	1162.33		1171.67
1051.67	877.333						1136.67		809.667	985.333		1206.67
1043.33	688					917.333	852		1111.33	1257.67		1122
689.333	755					862.333	916.333		1254			994
1231	1131.33					996.667	1111.67		968
984.333	947					982	993.333
932.667	844.667					1123.33	1062
	919.333					1034.33
	969					1195.33
															3 W	+		Table Analyzed	DAY SLEEP						Šídák's multiple comparisons test	Predicted (LS) mean diff.	95.00% CI of diff.	Below threshold?	Summary	Adjusted P Value
Figure 3b																Ampkα OE
w1118			Ampkα OE			Ampkα			Dead SNF1AOE			SNF1A OE				Ampkα		Two-way ANOVA	Ordinary						3 WEEKS:+ vs. 3 WEEKS:Ampkα OE	181.6	89.28 to 273.9	Yes	****	<0.0001
3 w	6w		3 w	6w		3 w	6w		3 w	6w		3 w	6w			Dead SNF1AOE		Alpha	0.05						3 WEEKS:+ vs. 3 WEEKS:Ampkα	-28.48	-101.3 to 44.32	No	ns	0.989
531.333	433		108	108			449.333		257	560		333	611.667			SNF1A OE									3 WEEKS:+ vs. 3 WEEKS:Dead SNF1A OE	45.75	-26.17 to 117.7	No	ns	0.626
562.667	484		170.333	170.333		395.667	455.667		592	592		487.333	633.333					Source of Variation	% of total variation	P value	P value summary	Significant?			3 WEEKS:+ vs. 3 WEEKS:SNF1AOE	-0.8145	-73.61 to 71.98	No	ns	>0.9999
547.667	566.667		687.333	687.333		467.667	378		543.333				637.333		6w	+		Interaction	2.346	0.0655	ns	No			3 WEEKS:+ vs. 3 WEEKS:SNF1AOE	-0.8145	-73.61 to 71.98	No	ns	>0.9999
523.667	426.333		190.667	190.667		485.333	578.667		325.333	357		286.667	570.333			Ampkα OE		AGE	0.2505	0.3295	ns	No			6 WEEKS:+ vs. 6 WEEKS:Ampkα OE	161.4	58.41 to 264.3	Yes	****	<0.0001
	490		270	270		575.667	542.333		463	378.667		483.333	438			Ampkα		GENOTYPE	22.25	<0.0001	****	Yes			6 WEEKS:+ vs. 6 WEEKS:Ampkα	-12.64	-82.85 to 57.58	No	ns	>0.9999
515	377.667		253.333	253.333		429.333	598		575	419		593.333	557.667			Dead SNF1AOE									6 WEEKS:+ vs. 6 WEEKS:Dead SNF1A OE	-13.05	-85.61 to 59.51	No	ns	>0.9999
	471		93.6667	93.6667		632.333			343	488.333		367				SNF1A OE		ANOVA table	SS (Type III)	DF	MS	F (DFn, DFd)	P value		6 WEEKS:+ vs. 6 WEEKS:SNF1AOE	-75.57	-159.9 to 8.795	No	ns	0.1232
485	460.333		441.667	441.667		557.667	395		378	222.667		443.667						Interaction	91952	4	22988	F (4, 286) = 2.234	P=0.0655		6 WEEKS:+ vs. 6 WEEKS:SNF1AOE	-75.57	-159.9 to 8.795	No	ns	0.1232
502.333	617		137	137		596	492		488.667	439.333		530.667	547.667					AGE	9817	1	9817	F (1, 286) = 0.9542	P=0.3295		3 WEEKS:+ vs. 6 WEEKS:+	40.18	-31.75 to 112.1	No	ns	0.8075
	508.667		567.333	567.333		640.667	538		473	514.667		365.333	573.333					GENOTYPE	872033	4	218008	F (4, 286) = 21.19	P<0.0001		3 WEEKS:Ampkα OE vs. 6 WEEKS:Ampkα OE	19.93	-98.18 to 138.0	No	ns	>0.9999
489.667	581		487.333	487.333		547.333	339.667		460.333	592		579.333	557					Residual	2942572	286	10289				3 WEEKS:Ampkα vs. 6 WEEKS:Ampkα	56.03	-15.08 to 127.1	No	ns	0.2743
594	510		255			544.667	413.667		606.333	391		560	594												3 WEEKS:Dead SNF1A OE vs. 6 WEEKS:Dead SNF1A OE	-18.62	-91.18 to 53.94	No	ns	>0.9999
495	299.333		487.667			575.333	411		395.667	395		434.333	498.667					Difference between row means							3 WEEKS:SNF1AOE vs. 6 WEEKS:SNF1AOE	-34.58	-119.7 to 50.53	No	ns	0.9841
506.333	360.667		401.333			539.667	460		554	309.333		568.667	505					Predicted (LS) mean of 3 WEEKS	471.6
585.333	339		197.333			603	430.333		280.667	260.667		491.333	469.333					Predicted (LS) mean of 6 WEEKS	459
527.667			526			699	511.667		558.667	406.333		468.333	475.667					Difference between predicted means	12.59
493.667						585.667	539.667		386.333	365.333		388.333	538.667					SE of difference	12.89
483	364					582.333	578.333		423.333	555		592	594.333					95% CI of difference	-12.78 to 37.95
455.333	397.333					640	600.333		572.333	565		551.333	606.667
	539.333					630.667	652.667		422.667	578.333		392.333	447.667					Data summary
499	400.667					506.667	476.667		499	530		487	529.667					Number of columns (GENOTYPE)	5
501	615.333					412	415.333		601.333	615		529						Number of rows (AGE)	2
522	611.333						459.667		274.333	605.667		518						Number of values	296
	468.667						556.667			594		590.333
	456.333						463.333			499.667		539
	540.667					497.333	566.667		657.333	509.667		661.333
586	457					391.333	462.333		449	413.333		564
466.333	442.667					416.333	370		366.333	657.333		462.333
429	471.667					552.667	504		357.333	523.333		636.667
402	543					462.333	398.333		458.333	572.333		454.333
425	392.333					643.667	545.667		550.667	459		583.667
391.667	548.333					647	404		360	638.333		594.333
453.667	485.667					549.333	374		424			600.667
549	446.667					417	562.333		594			605.667
592.667	291.667					468.667	474.667		564.667			610
492.333	390					429	531.333		431.333			603.667
655.667	605.667					511			433			535.333
588.667	452.667					547			449.667			454.333
508	448.667					666.333			541
	606.333					543.667			619.333
	470.667					580.333			424.667
															3 W	+		Table Analyzed	NIGHT SLEEP						Šídák's multiple comparisons test	Predicted (LS) mean diff.	95.00% CI of diff.	Below threshold?	Summary	Adjusted P Value
Figure 3c																Ampkα OE
w1118			Ampkα OE			Ampkα			Dead SNF1AOE			SNF1A OE				Ampkα		Two-way ANOVA	Ordinary						3 WEEKS:+ vs. 3 WEEKS:Ampkα OE	41.31	-39.72 to 122.3	No	ns	0.8937
3 w	6w		3 w	6w		3 w	6w		3 w	6w		3 w	6w			Dead SNF1AOE		Alpha	0.05						3 WEEKS:+ vs. 3 WEEKS:Ampkα	-43.29	-107.0 to 20.42	No	ns	0.5156
526.333	617.667		320	676.333		553.667	533.667		265	640		539.667	656.333			SNF1A OE									3 WEEKS:+ vs. 3 WEEKS:Dead SNF1A OE	13.11	-50.60 to 76.82	No	ns	>0.9999
570	624.667		157.333	398.667		476.667	719.667		429.667	594		491.333	593.333					Source of Variation	% of total variation	P value	P value summary	Significant?			3 WEEKS:+ vs. 3 WEEKS:SNF1AOE	-70.12	-134.2 to -6.026	Yes	*	0.0203
561.333	644.333		646.333	544.333		481	585		299	587		441.333	632.667		6w	+		Interaction	1.874	0.1721	ns	No			3 WEEKS:+ vs. 3 WEEKS:SNF1AOE	-70.12	-134.2 to -6.026	Yes	*	0.0203
606	537.333		510.333			473	480.333			500		503.333	613.333			Ampkα OE		AGE	2.364	0.0047	**	Yes			6 WEEKS:+ vs. 6 WEEKS:Ampkα OE	-40.53	-133.6 to 52.55	No	ns	0.9698
609	609.333		521.333	587		534.333	449.667		556	575.333		417.667	554.333			Ampkα		GENOTYPE	11.6	<0.0001	****	Yes			6 WEEKS:+ vs. 6 WEEKS:Ampkα	-82.76	-143.2 to -22.29	Yes	***	0.001
554.333	460.333		308.333	634		490			564.333	606		528	623.333			Dead SNF1AOE									6 WEEKS:+ vs. 6 WEEKS:Dead SNF1A OE	-50.94	-113.9 to 12.05	No	ns	0.2381
627	517.333		174	444		597.333	613.333		433	652.667						SNF1A OE		ANOVA table	SS (Type III)	DF	MS	F (DFn, DFd)	P value		6 WEEKS:+ vs. 6 WEEKS:SNF1AOE	-96.11	-168.2 to -24.02	Yes	**	0.0015
462.667	562.333		653.667	452.667		637	510.333		556.667	452.333		619.667	447.333					Interaction	50457	4	12614	F (4, 287) = 1.609	P=0.1721		6 WEEKS:+ vs. 6 WEEKS:SNF1AOE	-96.11	-168.2 to -24.02	Yes	**	0.0015
586	634		193.667	483.667		568	658.667		485.333	560		631	680.333					AGE	63653	1	63653	F (1, 287) = 8.118	P=0.0047		3 WEEKS:+ vs. 6 WEEKS:+	9.98	-53.01 to 72.97	No	ns	>0.9999
477.667	604.667		604.667	447		557	491.667		588	554.667		400.667	520					GENOTYPE	312317	4	78079	F (4, 287) = 9.958	P<0.0001		3 WEEKS:Ampkα OE vs. 6 WEEKS:Ampkα OE	-71.86	-178.0 to 34.26	No	ns	0.5216
500.333	572		547.333	604.667		664.667	566.333		506.333	596.667		563	693.667					Residual	2250386	287	7841				3 WEEKS:Ampkα vs. 6 WEEKS:Ampkα	-29.49	-90.72 to 31.74	No	ns	0.9302
485.333	568.333		542			557.667	611.667		502	467.333		633	582												3 WEEKS:Dead SNF1A OE vs. 6 WEEKS:Dead SNF1A OE	-54.07	-117.8 to 9.644	No	ns	0.1781
581.667	360		590.333			579.333	555.333		586.333	451		543.667	458.667					Difference between row means							3 WEEKS:SNF1AOE vs. 6 WEEKS:SNF1AOE	-16.01	-89.07 to 57.05	No	ns	>0.9999
602	607.667		532			511.667			595.667	575.333		521.667	575					Predicted (LS) mean of 3 WEEKS	508.5
495.667	374.333		453.667			563	555.333		379.667			664.667	618.333					Predicted (LS) mean of 6 WEEKS	540.8
463.667	419		531			666.667	568.333		454.333	532.333		537	512.333					Difference between predicted means	-32.29
399						602.667	569.333		480	507.667		396.667	503					SE of difference	11.33
391	317					637.333	602.333		286.333	392.667		576.667	649.333					95% CI of difference	-54.59 to -9.983
424	457					642.667	630		588.667	636.667		594	670.333
	512.667					625	620.333		538.667	619.667		633	543					Data summary
446.667	449					491.667	621		477	362.333		691	529.667					Number of columns (GENOTYPE)	5
492.333	501.333					507.333	683		484	612.667		646						Number of rows (AGE)	2
425	446.333					666	628		539	436		608.333						Number of values	297
	566						546.667			368.667
	501.667					599.667	578.333		482.333	500.667		609.333
	515.667					527.333	602.667		507.667	503.333		599
	528.667					518	563.333		371	447.667		691
	428.667					481	639.667		580.667	619.667		635.667
397.667	446.333					547.667	525.333		342.333	579		576.667
526	373.333					423.333	551.667		425.667	590		674.333
403	258.333					492	487		319.333	526.333		428.333
434.667	470.333					481.333	573		509.667	619.333		462
502.667	563.333						591		561.333			616.667
450.667	430.667					448.667	448		534.667			534
	396.333					433.333	542.333		542.667			672.667
575.333	365					485.667	549.333		495.333			561.667
395.667	525.667					435	518.667		360			603
424.667	494.333					457	530.667		570.333			586.667
	396					490.667			634.667			539.667
	313					615			543.333
	498.333
															3 W	+		Table Analyzed	TOTAL SLEEP FRAGMENTATION						Šídák's multiple comparisons test	Predicted (LS) mean diff.	95.00% CI of diff.	Below threshold?	Summary	Adjusted P Value
Figure 3d																Ampkα OE
w1118			Ampkα OE			Ampkα			Dead SNF1AOE			SNF1A OE				Ampkα		Two-way ANOVA	Ordinary						3 WEEKS:+ vs. 3 WEEKS:Ampkα OE	-0.8444	-1.630 to -0.05916	Yes	*	0.0244
3 w	6w		3 w	6w		3 w	6w		3 w	6w		3 w	6w			Dead SNF1AOE		Alpha	0.05						3 WEEKS:+ vs. 3 WEEKS:Ampkα	-0.1154	-0.7500 to 0.5191	No	ns	>0.9999
1.43807	1.43807		2.70093	0.643564		2.52246	2.52246			2.04122		2.42007	2.42007			SNF1A OE									3 WEEKS:+ vs. 3 WEEKS:Dead SNF1A OE	-0.08226	-0.7035 to 0.5389	No	ns	>0.9999
0.839342	0.839342		2.80807	3.48603		2.54657	2.54657		2.04122	2.54861		3.63431	3.63431					Source of Variation	% of total variation	P value	P value summary	Significant?			3 WEEKS:+ vs. 3 WEEKS:SNF1AOE	-0.05152	-0.6687 to 0.5657	No	ns	>0.9999
			0.849659	2.48756					2.54861	2.99417		2.4879	2.4879		6w	+		Interaction	0.6019	0.7705	ns	No			3 WEEKS:+ vs. 3 WEEKS:SNF1AOE	-0.05152	-0.6687 to 0.5657	No	ns	>0.9999
1.42817	1.42817		3.33096	4.00115		0.706509	0.706509		2.99417	2.03165		2.41707	2.41707			Ampkα OE		AGE	0.3428	0.3108	ns	No			6 weeks:+ vs. 6 weeks:Ampkα OE	-0.5245	-1.410 to 0.3607	No	ns	0.7329
0.612721	0.612721		2.33656	2.074		0.886025	0.886025		2.03165	2.67118		2.34998	2.34998			Ampkα		GENOTYPE	5.531	0.0027	**	Yes			6 weeks:+ vs. 6 weeks:Ampkα	0.2726	-0.3550 to 0.9003	No	ns	0.9704
1.90776	1.90776		3.39486	0.607752		0.785198	0.785198		2.67118	2.30942		2.0612	2.0612			Dead SNF1AOE									6 weeks:+ vs. 6 weeks:Dead SNF1A OE	0.1086	-0.4906 to 0.7079	No	ns	>0.9999
2.26228	2.26228		1.16604	3.05895		0.661809	0.661809		2.30942	1.43842		1.08715	1.08715			SNF1A OE		ANOVA table	SS (Type III)	DF	MS	F (DFn, DFd)	P value		6 weeks:+ vs. 6 weeks:SNF1AOE	0.166	-0.5615 to 0.8935	No	ns	>0.9999
1.26814	1.26814		1.63563	2.23326		1.04323	1.04323		1.43842	0.843715		0.690859	0.690859					Interaction	1.36	4	0.3401	F (4, 280) = 0.4526	P=0.7705		6 weeks:+ vs. 6 weeks:SNF1AOE	0.166	-0.5615 to 0.8935	No	ns	>0.9999
0.883001	0.883001		3.49597	3.0858		1.51155	1.51155		0.843715	0.985339		3.35132	1.30038					AGE	0.7748	1	0.7748	F (1, 280) = 1.031	P=0.3108		3 WEEKS:+ vs. 6 weeks:+	-0.3357	-0.9529 to 0.2815	No	ns	0.8362
0.471068	0.471068		2.427	2.53871		2.1477	2.1477		0.985339	1.21942		1.56836	1.40588					GENOTYPE	12.5	4	3.125	F (4, 280) = 4.159	P=0.0027		3 WEEKS:Ampkα OE vs. 6 weeks:Ampkα OE	-0.01579	-1.025 to 0.9938	No	ns	>0.9999
1.89674	1.89674		3.17698	2.17555		1.64314	1.64314		1.21942	1.06324		0.44342	1.67131					Residual	210.4	280	0.7515				3 WEEKS:Ampkα vs. 6 weeks:Ampkα	0.05235	-0.5924 to 0.6971	No	ns	>0.9999
1.05013	1.05013		2.04113			0.564828	0.564828		1.06324	1.24703		2.32322	1.07004												3 WEEKS:Dead SNF1A OE vs. 6 weeks:Dead SNF1A OE	-0.1448	-0.7482 to 0.4586	No	ns	>0.9999
0.799174	0.799174		1.66244			0.637681	0.637681		1.24703	1.41459		0.702028	1.02124					Difference between row means							3 WEEKS:SNF1AOE vs. 6 weeks:SNF1AOE	-0.1182	-0.8457 to 0.6093	No	ns	>0.9999
0.758569	0.758569		1.86012			0.871823	0.871823		1.41459	2.8001		0.444316	1.72919					Predicted (LS) mean of 3 WEEKS	1.758
0.69113	0.69113		2.45776			0.489738	0.489738		2.8001	0.908004		0.85588	1.13163					Predicted (LS) mean of 6 weeks	1.87
0.549204	0.549204		2.79203			0.534767	0.534767		0.908004	1.46839		2.65662	1.1405					Difference between predicted means	-0.1124
1.82238	1.82238					1.54224	1.54224		1.46839	1.02676		1.19228	0.90501					SE of difference	0.1107
0.875795	0.875795					2.30505	2.30505		1.02676	0.81003		1.58898	3.20334					95% CI of difference	-0.3303 to 0.1055
1.94215	1.94215					0.591224	0.591224		0.81003	1.60934		1.53457	0.739855
							1.11788		1.60934	1.16092		0.905611						Data summary
1.60839	1.60839						1.85725		1.16092	2.33354		0.387219						Number of columns (GENOTYPE)	5
0.885721	0.885721						1.39309		2.33354	0.918579		0.763934						Number of rows (AGE)	2
0.465681	0.465681					1.29333	2.01934		0.918579	2.29804		1.00176						Number of values	290
	2.18113					3.25302	2.36287		1.35423	1.33148		1.20299
	3.41292					3.12094	1.89483		1.8903	1.56743		0.680388
3.375	3.95001					1.49672	1.78735		1.13765	1.2702		1.66259
2.21088	2.79642					1.77437	2.22818			1.11512		2.8413
3.22736	2.37662					2.01198	2.85655		1.66621	2.69578		0.81376
3.48504	3.49197					1.33538	2.76476		2.23896	3.02909		2.87022
	1.92943					3.11557	2.07256		1.57328	2.46596		1.93656
1.85489	2.0465						3.27081		2.37055	2.63519		1.11019
	3.53204					3.21814	2.05064		0.893067	3.51336		1.34009
3.005	3.88001					3.63664			2.04767	1.01488		0.703858
1.73101	4.55865					2.00178			1.44823	1.11094		2.04922
1.21928	1.27637					1.41933			2.3192	1.37615		1.32597
1.95035	2.07544					1.13244			1.76802	3.07003		1.6736
0.507717	2.61523					2.54764			0.86819	1.01122		1.77465
1.46698	2.94126					1.25079			0.950528
2.30176	1.84881
															3 W	+		Table Analyzed	DAY SLEEP FRAGMENTATION						Šídák's multiple comparisons test	Predicted (LS) mean diff.	95.00% CI of diff.	Below threshold?	Summary	Adjusted P Value
Figure 3e																Ampkα OE
w1118			Ampkα OE			Ampkα			Dead SNF1AOE			SNF1A OE				Ampkα		Two-way ANOVA	Ordinary						3:+ vs. 3:Ampkα OE	-0.5843	-1.223 to 0.05485	No	ns	0.106
3 w	6w		3 w	6w		3 w	6w		3 w	6w		3 w	6w			Dead SNF1AOE		Alpha	0.05						3:+ vs. 3:Ampkα	-0.4029	-0.9009 to 0.09502	No	ns	0.2373
0.193439	0.193439		1.75104	0.365789		2.29999	2.29999		1.92084	1.92084		1.45416	1.45416			SNF1A OE									3:+ vs. 3:Dead SNF1A OE	-0.03467	-0.5263 to 0.4570	No	ns	>0.9999
0.42447	0.42447		2.0537	2.34905		2.30512	2.30512		0.530046	0.530046		0.609655	0.609655					Source of Variation	% of total variation	P value	P value summary	Significant?			3:+ vs. 3:SNF1AOE	-0.1214	-0.6161 to 0.3733	No	ns	>0.9999
0.542645	0.542645		0.531143	2.60878		1.53938	1.53938		0.42185	0.42185		1.43699	1.43699		6w	+		Interaction	0.6361	0.7278	ns	No			3:+ vs. 3:SNF1AOE	-0.1214	-0.6161 to 0.3733	No	ns	>0.9999
0.832599	0.832599		2.10896	2.95275		1.91088	1.91088		1.65989	1.65989		1.04403	1.04403			Ampkα OE		AGE	0.7376	0.1248	ns	No			6 weeks:+ vs. 6 weeks:Ampkα OE	-0.7058	-1.434 to 0.02248	No	ns	0.0661
0.094905	0.094905		1.68977	1.49509		2.04995	2.04995		1.4321	1.4321		0.51197	0.51197			Ampkα		GENOTYPE	6.534	0.0004	***	Yes			6 weeks:+ vs. 6 weeks:Ampkα	-0.1403	-0.6425 to 0.3618	No	ns	0.9998
0.623077	0.623077		1.10963	0.299084		0.625	0.625		1.06388	1.06388		0.805324	0.805324			Dead SNF1AOE									6 weeks:+ vs. 6 weeks:Dead SNF1A OE	-0.005846	-0.4971 to 0.4854	No	ns	>0.9999
1.04348	1.04348		1.00839	2.19901		0.567297	0.567297		0.93913	0.93913		1.50068	1.50068			SNF1A OE		ANOVA table	SS (Type III)	DF	MS	F (DFn, DFd)	P value		6 weeks:+ vs. 6 weeks:SNF1AOE	-0.0001331	-0.5785 to 0.5782	No	ns	>0.9999
0.330813	0.330813		1.71356	1.55627		0.400524	0.400524		1.52381	1.52381		0.711472	0.711472					Interaction	1.047	4	0.2617	F (4, 297) = 0.5108	P=0.7278		6 weeks:+ vs. 6 weeks:SNF1AOE	-0.0001331	-0.5785 to 0.5782	No	ns	>0.9999
0.600889	0.600889		1.18264	2.84881		0.469037	0.469037		0.523874	0.523874		0.913208	0.913208					AGE	1.214	1	1.214	F (1, 297) = 2.369	P=0.1248		3:+ vs. 6 weeks:+	-0.1959	-0.6906 to 0.2988	No	ns	0.9876
0.113286	0.113286		1.72646	1.88185		0.688766	0.688766		0.596944	0.596944		2.09519	2.09519					GENOTYPE	10.75	4	2.688	F (4, 297) = 5.247	P=0.0004		3:Ampkα OE vs. 6 weeks:Ampkα OE	-0.3175	-1.151 to 0.5157	No	ns	0.9916
1.41616	1.41616		2.37372	1.90631		1.03605	1.03605		0.756939	0.756939		1.42423	1.88368					Residual	152.1	297	0.5122				3:Ampkα vs. 6 weeks:Ampkα	0.06668	-0.4387 to 0.5720	No	ns	>0.9999
0.673023	0.673023		1.46964			1.42717	1.42717		0.747309	0.747309		0.30323	0.850673												3:Dead SNF1A OE vs. 6 weeks:Dead SNF1A OE	-0.1671	-0.6553 to 0.3211	No	ns	0.9973
0.606958	0.606958		1.4642			0.954495	0.954495		1.41323	1.41323		1.36326	1.15818					Difference between row means							3:SNF1AOE vs. 6 weeks:SNF1AOE	-0.07465	-0.6530 to 0.5037	No	ns	>0.9999
0.350877	0.350877		0.934444			0.313093	0.313093		1.81772	1.81772		0.416372	0.848565					Predicted (LS) mean of 3	1.187
0.271786	0.271786		1.58164			0.400683	0.400683		1.62154	1.62154		0.400545	1.04385					Predicted (LS) mean of 6 weeks	1.325
0.371447	0.371447		1.98578			0.754516	0.754516		0.302326	0.302326		0.400524	1.85677					Difference between predicted means	-0.1377
1.27464	1.27464					0.236436	0.236436		0.748059	0.748059		1.80899	0.987554					SE of difference	0.08945
0.465839	0.465839					0.217514	0.217514		0.604249	0.604249		0.548842	0.780817					95% CI of difference	-0.3137 to 0.03835
1.34711	1.34711					1.05684	1.05684		0.412235	0.412235		1.16334	0.8011
						1.74797	1.74797		0.946372	0.946372		1.5695	2.62729					Data summary
0.887324	0.887324					0.394529	0.394529		0.492531	0.492531		1.61761	0.325208					Number of columns (GENOTYPE)	5
0.510638	0.510638						0.900321		1.06549	1.06549		0.274286						Number of rows (AGE)	2
0.192431	0.192431						1.34795		0.619048	0.619048		0.825601						Number of values	307
	1.21845						1.58172			2.16147
	2.3899					1.09693	1.86647			0.782377
2.45999	3.21233					3.32308	2.55093		0.0599334	1.45418		0.679887
0.955821	1.90813					3.53799	1.1084		1.05021	0.900469		1.1134
2.48246	1.21322					1.07331	1.3714		0.854319	0.626868		0.803138
2.70093	1.58361					1.82035	2.08866		0.574938	1.94091		1.39336
2.8242	1.26618					1.36805	2.08168		2.23418	2.05767		2.60313
1.07085	1.73045					0.793275	2.92218		0.936981	2.3385		0.638638
2.09816	2.91018					1.49686	1.1729		1.30764	1.88555		2.20876
1.56863	2.56152					3.4656	2.25446		1.24862			0.932268
1.17184	3.13032					2.71432	1.38068		1.28863	0.616016		0.819413
0.487901	0.898918					2.91239			0.646567	1.3229		0.834542
1.01309	1.03859					0.977357			1.65889	1.50078		0.538803
0.196599	2.58228					0.915189			0.615856	2.73183		1.23769
0.873772	1.54763					0.599401			1.24561	0.452269		0.980858
1.43504	1.50979					1.80806			1.36688			1.23521
						1.07697			0.83046			1.81943
									0.655652
															3 W	+		Table Analyzed	NIGHT SLEEP FRAGMENTATION						Šídák's multiple comparisons test	Predicted (LS) mean diff.	95.00% CI of diff.	Below threshold?	Summary	Adjusted P Value
Figure 3f																Ampkα OE
w1118			Ampkα OE			Ampkα			Dead SNF1AOE			SNF1A OE				Ampkα		Two-way ANOVA	Ordinary						3 WEEKS:+ vs. 3 WEEKS:Ampkα OE	-0.256	-0.5267 to 0.01471	No	ns	0.0811
3 w	6w		3 w	6w		3 w	6w		3 w	6w		3 w	6w			Dead SNF1AOE		Alpha	0.05						3 WEEKS:+ vs. 3 WEEKS:Ampkα	0.08304	-0.1293 to 0.2953	No	ns	0.989
0.927096	0.927096		1.28665	0.280447		0.748596	0.748596		0.681637	0.681637		1.08644	1.08644			SNF1A OE									3 WEEKS:+ vs. 3 WEEKS:Dead SNF1A OE	0.001699	-0.2057 to 0.2091	No	ns	>0.9999
0.152115	0.152115		0.861463	1.24384					0.713864	0.713864		0.446606	0.446606					Source of Variation	% of total variation	P value	P value summary	Significant?			3 WEEKS:+ vs. 3 WEEKS:SNF1AOE	0.1205	-0.08409 to 0.3250	No	ns	0.741
0.787857	0.787857		0.328749	0.431925		0.169443	0.169443		0.739067	0.739067					6w	+		Interaction	1.034	0.5349	ns	No			3 WEEKS:+ vs. 3 WEEKS:SNF1AOE	0.1205	-0.08409 to 0.3250	No	ns	0.741
0.257555	0.257555		1.56895	1.30617		0.311098	0.311098		0.42185	0.42185		0.493817	0.493817			Ampkα OE		AGE	0.009797	0.8631	ns	No			6 weeks:+ vs. 6 weeks:Ampkα OE	-0.06477	-0.3554 to 0.2258	No	ns	>0.9999
0.142727	0.142727		0.899319	0.656903		0.38361	0.38361		0.654984	0.654984		0.99664	0.99664			Ampkα		GENOTYPE	9.483	<0.0001	****	Yes			6 weeks:+ vs. 6 weeks:Ampkα	0.1753	-0.03195 to 0.3826	No	ns	0.1816
0.731027	0.731027			0.308824		0.227318	0.227318		0.659316	0.659316		0.542553	0.542553			Dead SNF1AOE									6 weeks:+ vs. 6 weeks:Dead SNF1A OE	0.1455	-0.05490 to 0.3458	No	ns	0.4027
0.319917	0.319917		0.365714	0.991011		0.378797	0.378797		0.288224	0.288224		0.447831	0.447831			SNF1A OE		ANOVA table	SS (Type III)	DF	MS	F (DFn, DFd)	P value		6 weeks:+ vs. 6 weeks:SNF1AOE	0.2185	-0.01999 to 0.4570	No	ns	0.1041
1.04611	1.04611		0.341081	0.823299		0.516629	0.516629		0.330586	0.330586		0.101881	0.101881					Interaction	0.2561	4	0.06403	F (4, 270) = 0.7864	P=0.5349		6 weeks:+ vs. 6 weeks:SNF1AOE	0.2185	-0.01999 to 0.4570	No	ns	0.1041
0.317469	0.317469			0.7728		0.756544	0.756544		0.41205	0.41205		0.363561	0.363561					AGE	0.002427	1	0.002427	F (1, 270) = 0.02980	P=0.8631		3 WEEKS:+ vs. 6 weeks:+	-0.09865	-0.3006 to 0.1033	No	ns	0.922
0.4301	0.4301		0.80221	0.750248		0.694559	0.694559		0.484749	0.484749		0.555687	0.091954					GENOTYPE	2.349	4	0.5872	F (4, 270) = 7.211	P<0.0001		3 WEEKS:Ampkα OE vs. 6 weeks:Ampkα OE	0.09258	-0.2494 to 0.4346	No	ns	0.9998
0.577615	0.577615		0.994116	0.554639		0.252596	0.252596		0.338225	0.338225		0.214997	0.56968					Residual	21.98	270	0.08143				3 WEEKS:Ampkα vs. 6 weeks:Ampkα	-0.006347	-0.2237 to 0.2110	No	ns	>0.9999
0.385109	0.385109		0.812654			0.245944	0.245944		0.219188	0.219188		0.429185	0.556522												3 WEEKS:Dead SNF1A OE vs. 6 weeks:Dead SNF1A OE	0.04512	-0.1607 to 0.2510	No	ns	>0.9999
0.247564	0.247564		0.414369			0.201119	0.201119					0.547453	0.308107					Difference between row means							3 WEEKS:SNF1AOE vs. 6 weeks:SNF1AOE	-0.0006257	-0.2413 to 0.2401	No	ns	>0.9999
0.407715	0.407715		0.935208			0.186051	0.186051					0.160253	0.205731					Predicted (LS) mean of 3 WEEKS	0.5849
0.438406	0.438406		1.09944			0.282092	0.282092		0.661286	0.661286		0.251907	0.264808					Predicted (LS) mean of 6 weeks	0.5785
0.187874	0.187874		0.920821			0.526423	0.526423		0.725926	0.725926		0.75408	0.253843					Difference between predicted means	0.006414
0.584369	0.584369					0.728403	0.728403		0.422584	0.422584		0.645929	0.383959					SE of difference	0.03715
0.410344	0.410344					0.212425	0.212425		0.398044	0.398044		0.56416	0.220026					95% CI of difference	-0.06673 to 0.07956
0.649014	0.649014						0.308554		0.693894	0.693894		0.407736	0.892989
0.917563	0.917563						0.618907		0.677824	0.677824		0.100913	0.416667					Data summary
0.72214	0.72214						0.189754					0.066974						Number of columns (GENOTYPE)	5
0.379373	0.379373					0.342027	0.446131		0.380218	0.380218		0.132822						Number of rows (AGE)	2
0.283151	0.283151					0.6591	0.462929		0.329625	0.36766		0.351872						Number of values	280
	0.967248					0.472918	0.796385		0.402832	0.565831		0.272288
	1.17925					0.466805	0.58522		1.03973	0.33154		0.0775268
0.915103	1.02638					0.324412	0.467377		0.578837	0.38814		0.435844
	0.956933					0.655652	0.922867			0.491994		0.669938
0.821801	1.18125					0.542967	0.552626		0.729232	0.801636		0.234225
0.907853							0.906869		0.937912	0.982759		0.812856
	0.687898						1.13868		0.460701	0.485068		1.01685
0.811998	0.533649					0.776622	0.724303		1.08393	0.848565		0.346767
	0.895319					0.984883			0.281167	0.750807		0.516956
	1.49397					1.02559			0.593769	0.40786		0.212598
0.59612	1.54018					0.514874			1.03805	0.136901		0.830664
0.772604	0.409216					0.538255			1.07438	0.193062		0.407039
1.04287	1.03793					0.814111			0.5195	0.732072		0.5302
0.323331	0.425693					0.303704			0.167978	0.562915		0.327802
0.593216	1.46025								0.343131
0.880167	0.492531
															3 W	+		Table Analyzed	TOTAL ACTIVITY						Šídák's multiple comparisons test	Predicted (LS) mean diff.	95.00% CI of diff.	Below threshold?	Summary	Adjusted P Value
Figure 3g																Ampkα OE
w1118			Ampkα OE			Ampkα			Dead SNF1AOE			SNF1A OE				Ampkα		Two-way ANOVA	Ordinary						3 weeeks:+ vs. 3 weeeks:Ampkα OE	-275.5	-578.9 to 27.86	No	ns	0.1113
3 w	6w		3 w	6w		3 w	6w		3 w	6w		3 w	6w			Dead SNF1AOE		Alpha	0.05						3 weeeks:+ vs. 3 weeeks:Ampkα	262.8	20.48 to 505.1	Yes	*	0.0223
588	721		1359	220.333			631.333		594.333	616.667		389				SNF1A OE									3 weeeks:+ vs. 3 weeeks:Dead SNF1A OE	118	-121.2 to 357.2	No	ns	0.916
693.333	521.667		2184	1073		881	622		691.333	729.333								Source of Variation	% of total variation	P value	P value summary	Significant?			3 weeeks:+ vs. 3 weeeks:SNF1AOE	320.7	76.69 to 564.7	Yes	**	0.0019
697.667	462.333		260.333	770		452.333	471.333		539.667	370		487	371.333		6w	+		Interaction	2.482	0.0692	ns	No			3 weeeks:+ vs. 3 weeeks:SNF1AOE	320.7	76.69 to 564.7	Yes	**	0.0019
725.667	1023.67		1187.33				834.333		747.667	1030.67		397	676.667			Ampkα OE		AGE	3.39	0.0006	***	Yes			6 weeks:+ vs. 6 weeks:Ampkα OE	160.4	-190.8 to 511.6	No	ns	0.9545
577.333	767.333		1278.33	451.333		491	1157		437.667	643.333		651.667	193.333			Ampkα		GENOTYPE	15.6	<0.0001	****	Yes			6 weeks:+ vs. 6 weeks:Ampkα	281	52.03 to 510.0	Yes	**	0.005
1021.33	1497		1585.33	241.667		638.667	747		627.333	505		716	250			Dead SNF1AOE									6 weeks:+ vs. 6 weeks:Dead SNF1A OE	217.1	-21.35 to 455.5	No	ns	0.1092
	1291		2427	1041.33		479.667	579.667		572	387.333		560.667	194.667			SNF1A OE		ANOVA table	SS (Type III)	DF	MS	F (DFn, DFd)	P value		6 weeks:+ vs. 6 weeks:SNF1AOE	434.2	157.0 to 711.4	Yes	****	<0.0001
1087	874		554	1244.67		429	296		1568.33	1019.67		863	544.667					Interaction	976954	4	244238	F (4, 279) = 2.200	P=0.0692		6 weeks:+ vs. 6 weeks:SNF1AOE	434.2	157.0 to 711.4	Yes	****	<0.0001
713.667	395.333		2029.33	955.333		557	999.333		756.333	1048.33		852	843.333					AGE	1334715	1	1334715	F (1, 279) = 12.02	P=0.0006		3 weeeks:+ vs. 6 weeks:+	15.89	-220.4 to 252.2	No	ns	>0.9999
825.667	514.667		600	1321		528.667	691.333		1047.67	671.333		642.667	385.667					GENOTYPE	6142287	4	1535572	F (4, 279) = 13.83	P<0.0001		3 weeeks:Ampkα OE vs. 6 weeks:Ampkα OE	451.8	52.38 to 851.2	Yes	*	0.0139
884.333	680.667		868	484.667		491.333	592		1566.33	1277.67		442.667	257.667					Residual	30972941	279	111014				3 weeeks:Ampkα vs. 6 weeks:Ampkα	34.11	-201.1 to 269.3	No	ns	>0.9999
687.667	633.667		1563.33			616.667	1228		458.667	997		522.333	605.333												3 weeeks:Dead SNF1A OE vs. 6 weeks:Dead SNF1A OE	114.9	-126.3 to 356.2	No	ns	0.9358
888.667	1224		739			606			711	1024		465.667	766.667					Difference between row means							3 weeeks:SNF1AOE vs. 6 weeks:SNF1AOE	129.4	-154.4 to 413.2	No	ns	0.955
883	986		832.333			731	653		833	358.667		427.667	464.333					Predicted (LS) mean of 3 weeeks	871.4						3 weeeks:SNF1AOE vs. 6 weeks:SNF1AOE	129.4	-154.4 to 413.2	No	ns	0.955
543	1003.67		1422.67			441.667	611.333		553.667	322.333		497.333	585.667					Predicted (LS) mean of 6 weeks	722.2
1052.33			823.667				715		1010.67	256.333		1274.33	736.667					Difference between predicted means	149.2
849						351	466			787		1163	775.667					SE of difference	43.04
1071.33	1509.67					336.333	321.333		847.667	1128.67		1405.33	325.333					95% CI of difference	64.51 to 233.9
1038.33	1001.67					294	281.333		1233.67	407.333			254.667
1537.67	734					367	261.333		1501.33	1485.67		870.333	659					Data summary
1508.67	1130.33					646.667	149.333		466.667	468.667		606	732.667					Number of columns (GENOTYPE)	5
738	632.333					855.667	419		516.667	752.333								Number of rows (AGE)	2
1379	528.667					274.667	783		1498.67	1098.33								Number of values	289
	705.333						657			743
	844.333						584.667			677
	603.667					677.333	1068		658	1068.33		331.667
	918.333					1216	413.333		901.333	251.333		326.667
1371	937.333					1051	909.333		1380.67	508.667		271
1361	984.667					1348.33	702.667		779.333	351.667		585.333
1438	1598.67					1015.67	1042.67		905	869.333		734
872.667	1450.67					856.333	610.667		724.667	578.333		222.667
1422	838.667					441.333	496		1308			800.667
	630					769	761.667		658.667			617
841.667	1026						969.333		470.333			311
1064.67	1712.33					1298.67	581		588.333			553.333
	1319.33					1034.33	753.667		692			223.667
358.333	504					859.333	689		778			460.333
860.667	1000.33					1105.33			1108.33			1014.33
1030.67	1202.67					724.333			660			975.333
	1230					971.667						959.667
	1048.67					445			634.667
															3 W	+		Table Analyzed	DAY ACTIVITY						Šídák's multiple comparisons test	Predicted (LS) mean diff.	95.00% CI of diff.	Below threshold?	Summary	Adjusted P Value
Figure 3h																Ampkα OE
w1118			Ampkα OE			Ampkα			Dead SNF1AOE			SNF1A OE				Ampkα		Two-way ANOVA	Ordinary						3 WEEKS:+ vs. 3 WEEKS:Ampkα OE	-307.4	-455.2 to -159.5	Yes	****	<0.0001
3 w	6w		3 w	6w		3 w	6w		3 w	6w		3 w	6w			Dead SNF1AOE		Alpha	0.05						3 WEEKS:+ vs. 3 WEEKS:Ampkα	77.22	-36.86 to 191.3	No	ns	0.5221
247	529		678	123.667			323.667			230.333			113.667			SNF1A OE									3 WEEKS:+ vs. 3 WEEKS:Dead SNF1A OE	53.5	-60.59 to 167.6	No	ns	0.9434
315	366.667		795.667	526			287.333		231.333	150.333		611	81.3333					Source of Variation	% of total variation	P value	P value summary	Significant?			3 WEEKS:+ vs. 3 WEEKS:SNF1AOE	62.7	-53.01 to 178.4	No	ns	0.8401
423.333	312			382.333		246	227		388.667				87.6667		6w	+		Interaction	6.184	0.0002	***	Yes			3 WEEKS:+ vs. 3 WEEKS:SNF1AOE	62.7	-53.01 to 178.4	No	ns	0.8401
433.333	547.333		831.667	771.667		499	456		636.667	635.333			331.667			Ampkα OE		AGE	2.399	0.003	**	Yes			6 WEEKS:+ vs. 6 WEEKS:Ampkα OE	13.26	-149.6 to 176.1	No	ns	>0.9999
188.333	498.667		762.333	218.667		186	551.667		285.333	384.333		379	485.333			Ampkα		GENOTYPE	16.47	<0.0001	****	Yes			6 WEEKS:+ vs. 6 WEEKS:Ampkα	102.5	-8.543 to 213.6	No	ns	0.0983
464			821.667	76.3333		350.667	408.667		260.667	456		244	216			Dead SNF1AOE									6 WEEKS:+ vs. 6 WEEKS:Dead SNF1A OE	78.7	-37.15 to 194.6	No	ns	0.5159
410.333	772.333		1046	350		141	217.667			281.667		727				SNF1A OE		ANOVA table	SS (Type III)	DF	MS	F (DFn, DFd)	P value		6 WEEKS:+ vs. 6 WEEKS:SNF1AOE	190.3	56.88 to 323.8	Yes	***	0.0005
409.333	540.667		409	732		231.333	85.3333		376	581.333								Interaction	592857	4	148214	F (4, 279) = 5.758	P=0.0002		6 WEEKS:+ vs. 6 WEEKS:SNF1AOE	190.3	56.88 to 323.8	Yes	***	0.0005
215	210.667		859	568		180	507		298	396.333		205.667	282					AGE	229957	1	229957	F (1, 279) = 8.934	P=0.0030		3 WEEKS:+ vs. 6 WEEKS:+	-38.19	-150.1 to 73.74	No	ns	0.9974
442	261		331.333	474		123.333	343		304.333	244		735	219.667					GENOTYPE	1579024	4	394756	F (4, 279) = 15.34	P<0.0001		3 WEEKS:Ampkα OE vs. 6 WEEKS:Ampkα OE	282.4	93.07 to 471.8	Yes	***	0.0002
195.667	276.333		502.667	315.667		354.667	308.667		356.333	185.667		145	202.333					Residual	7181040	279	25738				3 WEEKS:Ampkα vs. 6 WEEKS:Ampkα	-12.88	-126.1 to 100.4	No	ns	>0.9999
528	309		1143.67			292			144.333	535.667		251.333	209.667												3 WEEKS:Dead SNF1A OE vs. 6 WEEKS:Dead SNF1A OE	-12.99	-130.9 to 104.9	No	ns	>0.9999
532.333	635.667		447.333			233.333			361	491.333		374.667	234.667					Difference between row means							3 WEEKS:SNF1AOE vs. 6 WEEKS:SNF1AOE	89.46	-47.18 to 226.1	No	ns	0.5785
175.333	679.667		463.333			362	386.667		301.667	466.333		286.667	197					Predicted (LS) mean of 3 WEEKS	410.4
355.333	437		924			158.333	419			620		431.333	331.667					Predicted (LS) mean of 6 WEEKS	348.9
354.333	695		409.667				427.667		209.667	538		444.667	317.333					Difference between predicted means	61.57
385.667						162	281		520.667	555		318.333	222.333					SE of difference	20.6
449.333	479					193.333	189.333		521.667	186.667		216.667	169.333					95% CI of difference	21.02 to 102.1
627.667	373					127.333	155		223			197	128
589.333	304					172.333	139.333		404	189.667		381	291					Data summary
297.333	485.667					311	85.3333		344.333	371		402.333	353.667					Number of columns (GENOTYPE)	5
453.667	230					485	236.333		142.667	188.667		291.333						Number of rows (AGE)	2
	155.333					149.667	432		662.333	161		274.333						Number of values	289
637.667	387.667						325.333			248.667
240	369.333					370.667	310.667		96.6667	325		136.667
356	262.667					767.333	596		399.333	247.333		153.667
414.333	430					529	228		552	473.333		168.333
553	312.333					445.667	416.333		477.667	102		388.667
430	489.333					704	408		286.333	254.667		459.667
585.333	404					132.667	342		199	168		104.333
	675					116	315		458.333	426.333		383
248.667	286.667					331	213.667		292.333	320		178.333
285.333	336.333					544.333	305.333		198			135.667
392.333	340.333					422.667	577		234			181.667
	830					358.333	220		290.333			123.667
223.333	588					326.667	336.667		380.333			161.667
322.333	175					375.667	254		403.333			383.333
	483					109.667			307.667			660
	352.333					457.667			130.333			513.333
	189					225.667			351
	598.667
															3 W	+		Table Analyzed	NIGHT ACTIVITY						Šídák's multiple comparisons test	Predicted (LS) mean diff.	95.00% CI of diff.	Below threshold?	Summary	Adjusted P Value
Figure 3i																Ampkα OE
w1118			Ampkα OE			Ampkα			Dead SNF1AOE			SNF1A OE				Ampkα		Two-way ANOVA	Ordinary						3 WEEKS:+ vs. 3 WEEKS:Ampkα OE	146.2	-34.69 to 327.1	No	ns	0.2386
3 w	6w		3 w	6w		3 w	6w		3 w	6w		3 w	6w			Dead SNF1AOE		Alpha	0.05						3 WEEKS:+ vs. 3 WEEKS:Ampkα	169.9	36.58 to 303.2	Yes	**	0.003
341	192		681	96.6667		430.667	307.667			128.333		367.333	79.6667			SNF1A OE									3 WEEKS:+ vs. 3 WEEKS:Dead SNF1A OE	104.4	-28.89 to 237.7	No	ns	0.2827
378.333	155			547		358	334.667		616.333	172		552	168.667					Source of Variation	% of total variation	P value	P value summary	Significant?			3 WEEKS:+ vs. 3 WEEKS:SNF1AOE	246.9	112.8 to 381.1	Yes	****	<0.0001
274.333	150.333		193.333	387.667		206.333	244.333		845	201.667		435	107		6w	+		Interaction	0.8567	0.5811	ns	No			3 WEEKS:+ vs. 3 WEEKS:SNF1AOE	246.9	112.8 to 381.1	Yes	****	<0.0001
292.333	476.333		355.667				378.333		864.667	363.333		558.667	213			Ampkα OE		AGE	1.747	0.0163	*	Yes			6 weeks:+ vs. 6 weeks:Ampkα OE	54.65	-148.8 to 258.1	No	ns	0.9999
389	268.667		516			305			181.333	232.333		491.333	358			Ampkα		GENOTYPE	15.49	<0.0001	****	Yes			6 weeks:+ vs. 6 weeks:Ampkα	180.5	49.40 to 311.6	Yes	***	0.0009
557.333	608		763.667	165.333		288	338.333		256	273.333		362	169.667			Dead SNF1AOE									6 weeks:+ vs. 6 weeks:Dead SNF1A OE	147.5	11.77 to 283.3	Yes	*	0.0219
378.333	518.667			691.333		338.667	362		679.333	88.3333						SNF1A OE		ANOVA table	SS (Type III)	DF	MS	F (DFn, DFd)	P value		6 weeks:+ vs. 6 weeks:SNF1AOE	206.3	51.80 to 360.8	Yes	**	0.0015
676.667	333.333		145	512.667		197.667	210.667		218.333	449.333		284.667						Interaction	97135	4	24284	F (4, 271) = 0.7168	P=0.5811		6 weeks:+ vs. 6 weeks:SNF1AOE	206.3	51.80 to 360.8	Yes	**	0.0015
304.333	184.667			387.333		377			393.333	247		183.333	89.3333					AGE	198081	1	198081	F (1, 271) = 5.847	P=0.0163		3 WEEKS:+ vs. 6 weeks:+	75.17	-58.13 to 208.5	No	ns	0.7962
610.667	253.667		268.667	847		405.333	348.333		235.333	261			457					GENOTYPE	1756157	4	439039	F (4, 271) = 12.96	P<0.0001		3 WEEKS:Ampkα OE vs. 6 weeks:Ampkα OE	-16.38	-253.8 to 221.0	No	ns	>0.9999
442.333	404.333		365.333	169		136.667	283.333		391.333	201.667		342	55.3333					Residual	9181172	271	33879				3 WEEKS:Ampkα vs. 6 weeks:Ampkα	85.78	-45.31 to 216.9	No	ns	0.5791
492	324.667		419.667			324.667	388.333		293.333	484		145.667	395.667												3 WEEKS:Dead SNF1A OE vs. 6 weeks:Dead SNF1A OE	118.3	-17.48 to 254.1	No	ns	0.1495
360.667	588.333		291.667			372.667	266.333		266.333	557		277	532					Difference between row means							3 WEEKS:SNF1AOE vs. 6 weeks:SNF1AOE	34.56	-120.7 to 189.8	No	ns	>0.9999
350.667	306.333		369			369	192.333		270.333	205		429.333	267.333					Predicted (LS) mean of 3 WEEKS	419
367.667	566.667		498.667			283.333	287.333		768.333			129.333	254					Predicted (LS) mean of 6 weeks	359.5
697			414			97.6667	185		546.667	459		418.333	419.333					Difference between predicted means	59.48
494.667						189	132		527	469		533.667	553.333					SE of difference	24.6
685.667						143	126.333			600.333		426	156					95% CI of difference	11.05 to 107.9
589	628.667					166.667	122		235.667	350.667		245.667	126.667
	430					194.667	64		307	217.667		141.333	368					Data summary
	644.667					335.667	182.667		488.667			63.3333	379					Number of columns (GENOTYPE)	5
440.667	402.333					370.667	351		411	280		136.333						Number of rows (AGE)	2
	373.333					125	331.667		348.333	591.333		223						Number of values	281
	317.667						274
	475						472			418
	341					306.667	185.333		561.333	429.667		195
	488.333					448.667	493		502	595		173
1015	625					522	294.667		828.667	149.333		102.667
946.667	495.333					902.667			301.667	254		196.667
885						311.667	295.667		618.667	183.667		274.333
442.667	775.667					723.667	282.333		525.667	443		118.333
836.667	552					325.333	456.333		849.667	258.333		417.667
865.333	293.667					438	392.333		366.333			438.667
593	685.667						361		272.333			175.333
779.333	882.333					876	417		354.333			371.667
	731.333					676	435		401.667			100
295	329					532.667			397.667			298.667
637.333	517.333					729.667			705			631
708.333	850.333					614.667			352.333			315.333
	1041					514			114			446.333
	450					219.333			283.667
															3 W	+		Table Analyzed	TOTAL SLEEP						Šídák's multiple comparisons test	Predicted (LS) mean diff.	95.00% CI of diff.	Below threshold?	Summary	Adjusted P Value
Figure 3a'																Ampkα OE
w1118			Ampkα OE			Ampkα			Dead SNF1AOE			SNF1A OE				Ampkα		Two-way ANOVA	Ordinary						3 WEEKS:+ vs. 3 WEEKS:Ampkα OE	-31.73	-179.3 to 115.9	No	ns	>0.9999
3 w	6w		3 w	6w		3 w	6w		3 w	6w		3 w	6w			Dead SNF1AOE		Alpha	0.05						3 WEEKS:+ vs. 3 WEEKS:Ampkα	48.46	-71.78 to 168.7	No	ns	0.9853
1014	986.333		1042			794	1287		710	1135.67		940.333	1038.67			SNF1A OE									3 WEEKS:+ vs. 3 WEEKS:Dead SNF1A OE	93.97	-27.14 to 215.1	No	ns	0.297
921	1014.67		1078.33	762.667		1057.67	1122.67			861		1015	1083					Source of Variation	% of total variation	P value	P value summary	Significant?			3 WEEKS:+ vs. 3 WEEKS:SNF1AOE	-104.2	-227.2 to 18.74	No	ns	0.1794
966	950		904	1023.33		1004	1062.67		977.667	807.333		937	1206.67		6w	+		Interaction	3.315	0.0216	*	Yes			3 WEEKS:+ vs. 3 WEEKS:SNF1AOE	-104.2	-227.2 to 18.74	No	ns	0.1794
1227.67	1027		994.333	1215		954.667	1239		905.333	1147.67		954.333	1170.33			Ampkα OE		AGE	2.773	0.002	**	Yes			6 WEEKS:+ vs. 6 WEEKS:Ampkα OE	-2.149	-165.5 to 161.2	No	ns	>0.9999
880	1091.33		1096.67	1084.33		771.667	1208.33		803.667	1095		1037.67	1114.33			Ampkα		GENOTYPE	11.39	<0.0001	****	Yes			6 WEEKS:+ vs. 6 WEEKS:Ampkα	-83.11	-209.0 to 42.84	No	ns	0.5655
1027.67	825		720.667	647.667		1019	990.667		836.333	1180.33		1256	1132.33			Dead SNF1AOE									6 WEEKS:+ vs. 6 WEEKS:Dead SNF1A OE	123.5	-5.458 to 252.5	No	ns	0.0731
985.667	960.667		876.667	764.667		1081.33	1138.33		1055.33	793.667		1124.67	1105.33			SNF1A OE		ANOVA table	SS (Type III)	DF	MS	F (DFn, DFd)	P value		6 WEEKS:+ vs. 6 WEEKS:SNF1AOE	-62.73	-212.0 to 86.56	No	ns	0.9782
983.667	720		1121.67	636.667		1187	1019.67		881.333	1167.33		1056	1219.67					Interaction	348649	4	87162	F (4, 287) = 2.920	P=0.0216		6 WEEKS:+ vs. 6 WEEKS:SNF1AOE	-62.73	-212.0 to 86.56	No	ns	0.9782
1099.67	1023		957.667	785.667		1035	721.333		827	1169		1225.67	760					AGE	291648	1	291648	F (1, 287) = 9.770	P=0.0020		3 WEEKS:+ vs. 6 WEEKS:+	72.29	-55.09 to 199.7	No	ns	0.789
811.667	1025.33		1310	999.667		1196.67	1069		1011.33	624.667		1103.67	974					GENOTYPE	1198051	4	299513	F (4, 287) = 10.03	P<0.0001		3 WEEKS:Ampkα OE vs. 6 WEEKS:Ampkα OE	101.9	-77.70 to 281.4	No	ns	0.7894
	977.667		1009	939.333		847.333	798.667		924.333	918.667		954.667	977					Residual	8567069	287	29850				3 WEEKS:Ampkα vs. 6 WEEKS:Ampkα	-59.27	-178.0 to 59.44	No	ns	0.9085
	764.667		1022.67	1025.33		1007	848.333		1106	929.667		1126.33	771.667												3 WEEKS:Dead SNF1A OE vs. 6 WEEKS:Dead SNF1A OE	101.8	-20.94 to 224.6	No	ns	0.2053
1112.33	973.333		1273.33	1235.67		991	1161.67		942.667	1090.33		874.333						Difference between row means							3 WEEKS:SNF1AOE vs. 6 WEEKS:SNF1AOE	113.8	-31.75 to 259.4	No	ns	0.2856
1095.33	536.333		1119.67	943		881	544.667		1145.33	1284.67		1222.67	1021					Predicted (LS) mean of 3 WEEKS	1017
1043	844.333		1054.33	1146.33		923.667	625		986.333	804.333		911	713.667					Predicted (LS) mean of 6 WEEKS	950.7
1131.67	797.667		1190.33	1010.67		1038.33	893.667		820	1222		1099	985					Difference between predicted means	66.11
1178	1033.67		1104.33			1027.33	1079		686	1033		1114.33	680					SE of difference	21.15
725.333	1099.67		1022			1144.33	958.667		1047	793		1079.33	1100.67					95% CI of difference	24.48 to 107.7
1058	1051.33					799.667	579.333		895.667	964		983.333	1090.33
1162.67	954.333					883.667	1053.67		976.667	705.333		1356	1225.33					Data summary
1096.67	789.667					912	969		902.667	585.333		1132.67	802.667					Number of columns (GENOTYPE)	5
951	772					818.667	860		1226.67	398.667		1232.33						Number of rows (AGE)	2
877	828					836	749		1053.67	680		990.333						Number of values	297
721.333						835.333	725		917	550.667		1274.67
1204	671					961.667	1330		761.667	469.667		1151
1140.33						1023.67	1114		880.333	612.667		1264.33
854.333						1051.33	1092		1133	419.333		1314
852.333						989	1266.33		879.333	570.333		1173
678.333						877.333	1228.33		847.667	705.667		1328
1093.33						972.333	1161.67		1134	583.333		1160
1135.33						1053.67	1170.67		1019.67	1044.33		1218
1167						999.333	988.333		803.333	517		1195.67
1250.33						1110.67	1208.33		804.667	645.333		1233.33
1170						1083.33	1362		924.667	552.333
						961.667	1022.33		806.333	720.333
						778.333	1281		713.333
							1075
							1104.33
							1020.67
															3 W	+		Table Analyzed	DAY SLEEP						Šídák's multiple comparisons test	Predicted (LS) mean diff.	95.00% CI of diff.	Below threshold?	Summary	Adjusted P Value
Figure 3b'																Ampkα OE
w1118			Ampkα OE			Ampkα			Dead SNF1AOE			SNF1A OE				Ampkα		Two-way ANOVA	Ordinary						3 WEEKS:+ vs. 3 WEEKS:Ampkα OE	16.36	-73.79 to 106.5	No	ns	>0.9999
3 w	6w		3 w	6w		3 w	6w		3 w	6w		3 w	6w			Dead SNF1AOE		Alpha	0.05						3 WEEKS:+ vs. 3 WEEKS:Ampkα	39.95	-30.23 to 110.1	No	ns	0.7864
534.333			492.667	145.667		340.667	652.333		362.667	549.333		464.333	493			SNF1A OE									3 WEEKS:+ vs. 3 WEEKS:Dead SNF1A OE	53.98	-17.84 to 125.8	No	ns	0.3471
548.667	380.667		499	328.667		550.333	530			338		488	528.333					Source of Variation	% of total variation	P value	P value summary	Significant?			3 WEEKS:+ vs. 3 WEEKS:SNF1AOE	-44.36	-116.8 to 28.06	No	ns	0.6862
594	400.667		367.333	442.333		455.333	530.333		459	354.667		446.667	554.667		6w	+		Interaction	5.537	0.0006	***	Yes			6 WEEKS:+ vs. 6 WEEKS:Ampkα OE	50.65	-44.52 to 145.8	No	ns	0.8585
326.667	562		464.667	565.333		431.667	595.333		410.667	567		424	570			Ampkα OE		AGE	0.635	0.112	ns	No			6 WEEKS:+ vs. 6 WEEKS:Ampkα	-57.75	-133.8 to 18.31	No	ns	0.3312
541	533		481.667	447.333		260.333	621.667		373	562.333		435	510.333			Ampkα		GENOTYPE	7.857	<0.0001	****	Yes			6 WEEKS:+ vs. 6 WEEKS:Dead SNF1A OE	75.58	-1.912 to 153.1	No	ns	0.0625
553.667	527.333		217.333	196		460	477.667		408.333	606.333		601.333	539.667			Dead SNF1AOE									6 WEEKS:+ vs. 6 WEEKS:SNF1AOE	6.316	-83.94 to 96.57	No	ns	>0.9999
514.333	500.667		358.333	380		459.667	552.333		519	371		502.667	489.333			SNF1A OE		ANOVA table	SS (Type III)	DF	MS	F (DFn, DFd)	P value		3 WEEKS:+ vs. 6 WEEKS:+	23.42	-51.80 to 98.63	No	ns	0.9991
496.333	292.667		524.667	218.667		567.667	499		377	520.333		545	567.333					Interaction	231597	5	46319	F (5, 342) = 4.428	P=0.0006		3 WEEKS:Ampkα OE vs. 6 WEEKS:Ampkα OE	57.71	-49.65 to 165.1	No	ns	0.849
400.667	305.667		358.667	377.667		479.333	322.333		332	636		560.333	313.333					AGE	26561	1	26561	F (1, 342) = 2.539	P=0.1120		3 WEEKS:Ampkα vs. 6 WEEKS:Ampkα	-74.28	-145.4 to -3.190	Yes	*	0.0328
417.667	374		640.333	599		593.667	589.667		494	298.667		502	408.333					GENOTYPE	328608	5	65722	F (5, 342) = 6.282	P<0.0001		3 WEEKS:Dead SNF1A OE vs. 6 WEEKS:Dead SNF1A OE	45.01	-29.19 to 119.2	No	ns	0.7005
621.667			517.667	348.667		386.667	423.333		395	502.667		393.333	392					Residual	3577781	342	10461				3 WEEKS:SNF1AOE vs. 6 WEEKS:SNF1AOE	74.1	-13.85 to 162.0	No	ns	0.1868
591.667	394.667		460.667	458.333		427	366.667		509.667	512		498.667	297
388.667			618	575		365.333	542.333		479.667	615								Difference between row means
444			531.333	529.667		407.667				622.667		590	427.333					Predicted (LS) mean of 3 WEEKS	476.8
326.667			466	518.333		484.333	251.667		415.667	331.667		482.667	318					Predicted (LS) mean of 6 WEEKS	458.6
506.667			560	504.333		484.667	392		385.667	639.333		515.667	408.667					Difference between predicted means	18.19
615.333						431.333	579			482.333		512						SE of difference	11.41
550.333						585	458.667		426	431		539.333	598					95% CI of difference	-4.263 to 40.63
653.667						394.333			308.667	475		418.333	458.667
565.333						433.667	549.333		427	269.667		660.333	590					Data summary
						384.333	525.667		444	309.667		525	257.333					Number of columns (GENOTYPE)	6
						351.333	284		602.667	136		574						Number of rows (AGE)	2
						314.333	318.667		508.667	316.333		518.667						Number of values	354
						342	265		455.667	297.667		600.667
						429	660		398.333	133.333		544
						572.667	598.667		450.333	272.333		578.333
						477.667	619.333		569.667			630.667
						423.333	648		378.333	149.667		568.667
						350.667	621.333		374	301		673.667
						427.667	578		575	191		550.667
						631.667	624.333		483	482.333		562.333
						531.667	493.333		486.333	240		552
						563.333	627		507.333	304		601.333
						524.333	702		463.667	178
						509	623		291.333	255.333
						325.333	671.333		276
							501.333
							578.667
							480.667
Figure 3C'															3 W	+		Table Analyzed	NIGHT SLEEP						Šídák's multiple comparisons test	Predicted (LS) mean diff.	95.00% CI of diff.	Below threshold?	Summary	Adjusted P Value
																Ampkα OE
w1118			Ampkα OE			Ampkα			Dead SNF1AOE			SNF1A OE				Ampkα		Two-way ANOVA	Ordinary						3WEEKS:+ vs. 3WEEKS:Ampkα OE	-57.38	-124.6 to 9.897	No	ns	0.1728
3 w	6w		3 w	6w		3 w	6w		3 w	6w		3 w	6w			Dead SNF1AOE		Alpha	0.05						3WEEKS:+ vs. 3WEEKS:Ampkα	6.148	-49.77 to 62.07	No	ns	>0.9999
571.667	646		549.333			453.333	634.667		518.667	586.333		476	545.667			SNF1A OE									3WEEKS:+ vs. 3WEEKS:Dead SNF1A OE	19.93	-37.70 to 77.57	No	ns	0.9971
580.333	413		579.333	434		507.333	592.667		494.667	523		527	554.667					Source of Variation	% of total variation	P value	P value summary	Significant?			3WEEKS:+ vs. 3WEEKS:SNF1AOE	-72.84	-130.5 to -15.20	Yes	**	0.0033
506	574.667		536.667	581		548.667	532.333		430.667	452.667		490.333	652		6w	+		Interaction	5.058	0.0006	***	Yes			6 WEEKS:+ vs. 6 WEEKS:Ampkα OE	-28.76	-103.8 to 46.27	No	ns	0.9912
617.667	678.333		529.667	649.667		523	643.667		428	580.667		530.333	600.333			Ampkα OE		AGE	1.564	0.0089	**	Yes			6 WEEKS:+ vs. 6 WEEKS:Ampkα	-39.88	-97.49 to 17.73	No	ns	0.485
552.333	491.333		615	637		511.333	586.667		536.333	532.667		602.667	604			Ampkα		GENOTYPE	14.32	<0.0001	****	Yes			6 WEEKS:+ vs. 6 WEEKS:Dead SNF1A OE	43.76	-15.27 to 102.8	No	ns	0.3696
534	478.333		503.333	451.667		559	513		504.333	574		654.667	592.667			Dead SNF1AOE									6 WEEKS:+ vs. 6 WEEKS:SNF1AOE	-92.93	-163.7 to -22.20	Yes	**	0.0018
523	595.667		518.333	384.667		621.667	586		495	422.667		622	616			SNF1A OE		ANOVA table	SS (Type III)	DF	MS	F (DFn, DFd)	P value		3WEEKS:+ vs. 6 WEEKS:+	40.41	-18.24 to 99.05	No	ns	0.4932
461	523.333		597	418		619.333	520.667		517.333	647		511	652.333					Interaction	143171	5	28634	F (5, 343) = 4.484	P=0.0006		3WEEKS:Ampkα OE vs. 6 WEEKS:Ampkα OE	69.03	-12.92 to 151.0	No	ns	0.187
554.667	576.667		599	408		555.667	399		529.333	533		665.333						AGE	44265	1	44265	F (1, 343) = 6.932	P=0.0089		3WEEKS:Ampkα vs. 6 WEEKS:Ampkα	-5.625	-60.46 to 49.21	No	ns	>0.9999
463.333	511.667		669.667	400.667		603	479.333		596.333	326		601.667	565.667					GENOTYPE	405305	5	81061	F (5, 343) = 12.69	P<0.0001		3WEEKS:Dead SNF1A OE vs. 6 WEEKS:Dead SNF1A OE	64.23	6.203 to 122.3	Yes	*	0.0178
512	410.667		491.333	590.667		460.667	375.333		463	416		561.333	585					Residual	2190379	343	6386				3WEEKS:SNF1AOE vs. 6 WEEKS:SNF1AOE	20.31	-49.59 to 90.21	No	ns	0.9996
548.667	414		562	567		580	481.667		528.333	417.667		627.667	474.667
476.667	378.333		655.333	660.667		625.667	619.333		570.667	475.333		519.333						Difference between row means
533.333			588.333	413.333		473.333	380.667		434.333	662		632.667	593.667					Predicted (LS) mean of 3WEEKS	537.9
430	590.333		588.333	628		439.333	373.333		493	472.667			576.333					Predicted (LS) mean of 6 WEEKS	514.5
	575.333		630.333	506.333		553.667	501.667		621	582.667		583.333	504					Difference between predicted means	23.4
	495.333					596	500		587	550.667		602.333	502.667					SE of difference	8.887
565	363.667					559.333	500		549.667	362		540	631.667					95% CI of difference	5.918 to 40.88
548.333	577					405.333	501.667		458.667	489		565	635.333
508.667	443					450	504.333		624	435.667		695.667	545.333					Data summary
583	463.667		650			527.667	443.333		545	275.667		607.667						Number of columns (GENOTYPE)	6
584	397		609.333			467.333	576		461.333	262.667		658.333						Number of rows (AGE)	2
398.667	471.667		631.333			521.667	430.333		363.333	363.667		471.667						Number of values	355
517	566.667					493.333	460		430	253		674
609	524					532.667	670		563.333	336.333		607
582.333	453.667					451	515.333		501	340.333		686
454.667	497					573.667	472.667		473.667	389.667		683.333
476.333	466.333					565.667	618.333		559	420.667		604.333
	454					526.667	607		536.667	404.667		654.333
582.333	291.667					544.667	583.667			392.333		609.333
548.667	276.333					422	546.333			562		655.667
465.667						467.667	495		461	277		643.667
408.333						547.333	581.333		515	341.333		632
351.667						559	660		437.333	374.333
586.667						452.667	399.333			465
520						453	609.667
616.667							573.667
596.667							525.667
604.667							540
Figure 3d'															3 W	+		Table Analyzed	TOTAL SLEEP FRAGMENTATION						Šídák's multiple comparisons test	Predicted (LS) mean diff.	95.00% CI of diff.	Below threshold?	Summary	Adjusted P Value
																Ampkα OE
w1118			Ampkα OE			Ampkα			Dead SNF1AOE			SNF1A OE				Ampkα		Two-way ANOVA	Ordinary						3 WEEKS :+ vs. 3 WEEKS :Ampkα OE	-1.02	-1.711 to -0.3290	Yes	***	0.0003
3 w	6w		3 w	6w		3 w	6w		3 w	6w		3 w	6w			Dead SNF1AOE		Alpha	0.05						3 WEEKS :+ vs. 3 WEEKS :Ampkα	-0.05808	-0.6137 to 0.4976	No	ns	>0.9999
0.747122	0.538657		2.69491	3.1075		0.301316	0.609169		0.340455	0.846199		0.356974	1.1349			SNF1A OE									3 WEEKS :+ vs. 3 WEEKS :Dead SNF1A OE	-0.219	-0.7664 to 0.3284	No	ns	0.9864
	2.13558		1.85018	3.77637		0.412136	1.0096		0.954635	1.73648		0.703139	1.81481					Source of Variation	% of total variation	P value	P value summary	Significant?			3 WEEKS :+ vs. 3 WEEKS :SNF1AOE	0.1658	-0.3990 to 0.7306	No	ns	0.9996
0.616919	0.460613		2.01377	2.60858		0.819592	0.68601		0.356972			0.672274	1.37053		6w	+		Interaction	1.799	0.1423	ns	No			6 WEEKS:+ vs. 6 WEEKS:Ampkα OE	-0.7587	-1.472 to -0.04552	Yes	*	0.0273
1.37859	0.50787		1.58241	0.896296		0.596875	0.355932		0.43412	1.95217		0.577264	0.685939			Ampkα OE		AGE	13.17	<0.0001	****	Yes			6 WEEKS:+ vs. 6 WEEKS:Ampkα	0.1689	-0.3991 to 0.7368	No	ns	0.9995
0.915366	1.64551		2.21858	1.57557		0.386779	0.376644		0.379805	1.98823		0.520105	0.638149			Ampkα		GENOTYPE	10.08	<0.0001	****	Yes			6 WEEKS:+ vs. 6 WEEKS:Dead SNF1A OE	-0.3263	-0.9092 to 0.2566	No	ns	0.8059
0.877163	2.88386		2.33256	2.30846		0.396944	1.21269		0.373289	1.59089		1.60247	1.12344			Dead SNF1AOE									6 WEEKS:+ vs. 6 WEEKS:SNF1AOE	0.1849	-0.4911 to 0.8608	No	ns	0.9998
0.697669	1.93703		2.37883	4.10113		0.748846	1.75266		0.289918	1.31723		0.555391	1.72507			SNF1A OE		ANOVA table	SS (Type III)	DF	MS	F (DFn, DFd)	P value		3 WEEKS :+ vs. 6 WEEKS:+	-0.8423	-1.417 to -0.2673	Yes	***	0.0003
0.731757	1.91626		1.85924	4.24712		1.0903	1.49118		1.1514	1.58395		0.484898	1.16325					Interaction	4.954	5	0.9909	F (5, 335) = 1.666	P=0.1423		3 WEEKS :Ampkα OE vs. 6 WEEKS:Ampkα OE	-0.5809	-1.391 to 0.2287	No	ns	0.4238
1.6043	1.38103		1.93006	3.62042		0.636227			0.34444	1.63065		1.06027	1.80132					AGE	36.26	1	36.26	F (1, 335) = 60.96	P<0.0001		3 WEEKS :Ampkα vs. 6 WEEKS:Ampkα	-0.6154	-1.164 to -0.06707	Yes	*	0.0152
0.559283	2.67196		1.32494	2.53429		2.3298	1.81104		1.07538	2.39345		0.713373	1.9279					GENOTYPE	27.75	5	5.549	F (5, 335) = 9.329	P<0.0001		3 WEEKS :Dead SNF1A OE vs. 6 WEEKS:Dead SNF1A OE	-0.9496	-1.505 to -0.3940	Yes	****	<0.0001
0.564514			2.54337	2.06104		0.3947	2.20868		0.470292	2.9434		0.311801	1.92198					Residual	199.3	335	0.5948				3 WEEKS :SNF1AOE vs. 6 WEEKS:SNF1AOE	-0.8233	-1.490 to -0.1560	Yes	**	0.0046
0.541443	2.10791		2.34702	2.80895		0.482871	1.58481		1.17639	2.54763		0.48214	2.03902
0.465028			1.15371	0.680604		0.482375	0.72396		0.509825	1.66962		0.39025	2.5165					Difference between row means
0.613801	2.99725		2.02928	2.17933		0.29135	3.29029		0.70405	0.780574			2.41525					Predicted (LS) mean of 3 WEEKS	1.15
0.372704	1.31422		0.951101	1.0283		0.430257	2.47538		0.820729	3.58074		0.304841						Predicted (LS) mean of 6 WEEKS	1.826
0.36227	0.897378		1.27779	2.24813		0.528464	2.2325		0.530236	1.16103		0.386367	2.47206					Difference between predicted means	-0.6762
1.55083	1.7194					0.591744	1.71362		0.669922	1.93138		1.06589	0.799616					SE of difference	0.08661
	1.75821					1.46003	1.37703		0.725069	3.40984		1.6085	1.08079					95% CI of difference	-0.8466 to -0.5058
0.829981	1.89966					0.508227	2.44898		0.484406				0.85296
0.920204	1.98964					0.292121	1.89349		0.57167	1.4518		0.634546	1.8307					Data summary
1.25741	2.25832					0.328914	3.92444		1.74311	3.4085		1.48411						Number of columns (GENOTYPE)	6
1.43348	2.69132					0.35044	2.42494		0.469565	2.25752		0.74644						Number of rows (AGE)	2
0.493611	1.23068					1.35579			2.03744	3.67647		1.5092						Number of values	347
1.09263	0.81843						3.58759		2.58282	1.49233		0.571765
1.07378	1.57303					1.63616	0.225841			1.91625		1.00434
0.894966	1.05076					2.06708	0.576102		2.40363	3.8658		0.219703
0.904779	2.23385					0.914077	3.59626		1.70874	1.61208		0.324964
2.14114	1.55671					1.46006	0.467579		2.23515	2.4438		1.02453
	1.99732					2.10752	0.578924		1.7035	1.6062		0.633283
0.279085	2.30798					1.51126	0.918604		1.55556	1.94305		0.976827
1.31112	1.62295					2.09649	0.930239		0.750681	1.79806		0.583675
1.37976						1.90805	1.78482		0.975934	2.28003		0.495214
						1.23259	0.865195		2.51657	1.82662		0.303063
2.24226						0.984723	0.172622		1.53437	1.77751
0.823171							2.34855		2.08475	1.36295
0.465942							0.956284		1.98894
0.365991							1.93935
0.115169							0.643928
0.365052							2.48215
Figure 3e'															3 W	+		Table Analyzed	DAY SLEEP FRAGMENTATION						Šídák's multiple comparisons test	Predicted (LS) mean diff.	95.00% CI of diff.	Below threshold?	Summary	Adjusted P Value
																Ampkα OE
w1118			Ampkα OE			Ampkα			Dead SNF1AOE			SNF1A OE				Ampkα		Two-way ANOVA	Ordinary						3 WEEKS:+ vs. 3 WEEKS:Ampkα OE	-0.5839	-1.128 to -0.03950	Yes	*	0.0251
3 w	6w		3 w	6w		3 w	6w		3 w	6w		3 w	6w			Dead SNF1AOE		Alpha	0.05						3 WEEKS:+ vs. 3 WEEKS:Ampkα	0.04428	-0.4013 to 0.4899	No	ns	>0.9999
1.17549	0.236167		1.75601	2.39207		0.31893	0.286762		0.722433	0.375355		0.621951	0.523517			SNF1A OE									3 WEEKS:+ vs. 3 WEEKS:Dead SNF1A OE	0.1974	-0.2515 to 0.6463	No	ns	0.9673
	0.898246		1.61416	2.79953		0.702381	0.353523		1.37574	1.18343			1.09714					Source of Variation	% of total variation	P value	P value summary	Significant?			3 WEEKS:+ vs. 3 WEEKS:SNF1AOE	0.3882	-0.07178 to 0.8482	No	ns	0.1848
0.838884	0.237624		1.75669	1.82311		2.01926	0.0926276		0.404078			1.15484	1.09828		6w	+		Interaction	4.266	0.0053	**	Yes			6 WEEKS:+ vs. 6 WEEKS:Ampkα OE	-0.7668	-1.331 to -0.2023	Yes	**	0.0011
2.14201	0.386598		0.891044	0.830385		1.32819	0.0824453		0.60503	1.73869		0.956916	0.312256			Ampkα OE		AGE	1.6	0.0121	*	Yes			6 WEEKS:+ vs. 6 WEEKS:Ampkα	0.0328	-0.4125 to 0.4781	No	ns	>0.9999
0.737717	0.813369		2.35154	1.71753		0.356196	0.0714924		0.523125	1.20142		0.692267	0.589878			Ampkα		GENOTYPE	10	<0.0001	****	Yes			6 WEEKS:+ vs. 6 WEEKS:Dead SNF1A OE	-0.2113	-0.6713 to 0.2487	No	ns	0.9526
2.44558	1.33421		2.29499	2.10941		0.405843	0.677824		0.453704	0.617134			0.767058			Dead SNF1AOE									6 WEEKS:+ vs. 6 WEEKS:SNF1AOE	-0.1754	-0.7017 to 0.3510	No	ns	0.9981
0.6352	1.61465		2.53046	2.87335		0.796296	1.1343		0.332895	0.974797		0.721038	1.31692			SNF1A OE		ANOVA table	SS (Type III)	DF	MS	F (DFn, DFd)	P value		3 WEEKS:+ vs. 6 WEEKS:+	-0.02307	-0.4831 to 0.4369	No	ns	>0.9999
1.44739	0.876727		1.01147	3.07739		1.67802	0.857079		1.3536	1.93089		0.728584	0.755058					Interaction	6.396	5	1.279	F (5, 333) = 3.392	P=0.0053		3 WEEKS:Ampkα OE vs. 6 WEEKS:Ampkα OE	-0.206	-0.8411 to 0.4292	No	ns	0.9986
	1.17122		2.25499	2.71139		0.931012			0.376089	0.653151		0.968171	1.12281					AGE	2.399	1	2.399	F (1, 333) = 6.361	P=0.0121		3 WEEKS:Ampkα vs. 6 WEEKS:Ampkα	-0.03455	-0.4650 to 0.3959	No	ns	>0.9999
1.00537	1.48438		1.35219	1.47258			1.06172		1.52469	1.62054		0.822316	1.45125					GENOTYPE	14.99	5	2.999	F (5, 333) = 7.952	P<0.0001		3 WEEKS:Dead SNF1A OE vs. 6 WEEKS:Dead SNF1A OE	-0.4318	-0.8807 to 0.01708	No	ns	0.0704
1.28667	1.98657		1.48055	2.41205		0.569034	1.14511		0.427847	1.75321		0.374004	2.05139					Residual	125.6	333	0.3771				3 WEEKS:SNF1AOE vs. 6 WEEKS:SNF1AOE	-0.5866	-1.113 to -0.06026	Yes	*	0.0165
0.493498	0.885366		1.62298	1.88281		0.496255	1.01939		1.46269	2.0842		0.517516	1.95034
0.98551			0.90584	0.502609		0.44497	0.362292		0.829861	1.10038		0.5664	1.26724					Difference between row means
1.27967	1.82339		1.60394	1.03049		0.40554	2.6945		1.23435	0.467638			2.16158					Predicted (LS) mean of 3 WEEKS	1.048
0.305447	0.636976		0.801525	0.773694		1.02817	1.5894		0.76102			0.572335	2.02241					Predicted (LS) mean of 6 WEEKS	1.222
0.705923	0.481233		1.06113	0.741132		1.02888	1.95266		0.648527	0.690501		0.585911						Difference between predicted means	-0.1735
	0.748445		2.18064			0.576889	0.703011		0.462779	1.29848		1.22628	2.27273					SE of difference	0.06878
	1.3192						0.68097		0.584362	2.38509		0.558101	0.296956					95% CI of difference	-0.3088 to -0.03818
1.16308	1.88983					0.745432	1.76768		0.455128	2.02316		1.53291	1.1525
2.37185	0.641212					0.45196	1.13636		0.625247	0.797693		0.630252	0.456551					Data summary
	1.86807					0.54	3.04762		0.843742	2.41263		1.04167	1.94329					Number of columns (GENOTYPE)	6
	1.85234					0.575785	2.14998		0.373341	1.36334		0.697674						Number of rows (AGE)	2
0.814167	0.621482					0.623542	3.01254		1.84884	2.19213		0.647613						Number of values	345
0.668519	0.481807					2.08333	2.96595			1.04853		0.56112
1.0221	0.662442					1.38021	0.114035			1.08		0.762344
0.609989	0.355082					1.15171	0.156088		1.31483	2.36527		0.185378
0.60655	1.32156					0.731002	1.93315		1.12658	0.695473		0.283086
1.81947	1.13995					1.35742	0.353578			1.12918		0.413928
2.70512	1.54562					1.83016	0.330651		1.07527	0.81543		0.287905
0.0719554	1.51797					1.23888	0.479478		0.818798	0.930774		0.392539
0.793427	0.820946					0.886252	0.578217		0.334259	1.26847		0.40107
0.86478						1.43971	0.760226		0.329906	0.741771		0.275564
2.30977						0.886453	0.313433		1.3832	0.678781		0.134925
1.35						0.530448	0.045591		0.463935	1.4382
0.663377						2.55118	0.972992		1.61137	0.735346
0.276144						1.49383	0.555666		0.853914
0.323037							1.3511
0.0437607							0.424155
0.0952381							1.63333
Figure 3f'															3 W	+		Table Analyzed	NIGHT SLEEP FRAGMENTATION						Šídák's multiple comparisons test	Predicted (LS) mean diff.	95.00% CI of diff.	Below threshold?	Summary	Adjusted P Value
																Ampkα OE
w1118			Ampkα OE			Ampkα			Dead SNF1AOE			SNF1A OE				Ampkα		Two-way ANOVA	Ordinary						3 WEEKS:+ vs. 3 WEEKS:Ampkα OE	0.4152	-0.06805 to 0.8985	No	ns	0.1646
3 w	6w		3 w	6w		3 w	6w		3 w	6w		3 w	6w			Dead SNF1AOE		Alpha	0.05						3 WEEKS:+ vs. 3 WEEKS:Ampkα	-0.06406	-0.4618 to 0.3337	No	ns	>0.9999
1.9105	0.303093		1.01408	1.0504		1.30198	0.323195		0.642245	0.472144		0.826389	0.611482			SNF1A OE									3 WEEKS:+ vs. 3 WEEKS:Dead SNF1A OE	-0.1317	-0.5363 to 0.2730	No	ns	0.9985
	1.27881		0.45917	1.25448		0.987457	0.673023		3.08876	0.666242		1.23387	0.74094					Source of Variation	% of total variation	P value	P value summary	Significant?			3 WEEKS:+ vs. 3 WEEKS:SNF1AOE	0.1421	-0.2626 to 0.5468	No	ns	0.9965
1.90171	0.222994		0.557756	0.933867		1.37417	0.749532		1.49139	1.00245		1.57102	0.392237		6w	+		Interaction	4.083	0.0122	*	Yes			6 WEEKS:+ vs. 6 WEEKS:Ampkα OE	-0.09258	-0.5812 to 0.3960	No	ns	>0.9999
	0.156642		0.704798	0.197708		1.08402	0.304033		1.28325	0.439108		1.37719	0.374376			Ampkα OE		AGE	3.604	0.0003	***	Yes			6 WEEKS:+ vs. 6 WEEKS:Ampkα	0.08585	-0.2996 to 0.4713	No	ns	>0.9999
	0.840334		0.399097	0.29245		1.64044	0.366667		1.15488	0.801836		1.56421	0.143985			Ampkα		GENOTYPE	3.045	0.0524	ns	No			6 WEEKS:+ vs. 6 WEEKS:Dead SNF1A OE	-0.06018	-0.4555 to 0.3352	No	ns	>0.9999
1.33667	1.55756		0.692274	0.744157		1.93426	0.541477		1.42456	1.00232			0.396255			Dead SNF1AOE									6 WEEKS:+ vs. 6 WEEKS:SNF1AOE	0.2798	-0.1830 to 0.7425	No	ns	0.7051
	0.563945		0.471103	1.37165			0.658532		1.2063	0.419948		1.79273	0.543869			SNF1A OE		ANOVA table	SS (Type III)	DF	MS	F (DFn, DFd)	P value		3 WEEKS:+ vs. 6 WEEKS:+	0.1826	-0.2185 to 0.5837	No	ns	0.9559
1.47917	1.03968		0.858203	1.6211			0.644302			0.198217		1.36891	0.441896					Interaction	4.198	5	0.8395	F (5, 320) = 2.973	P=0.0122		3 WEEKS:Ampkα OE vs. 6 WEEKS:Ampkα OE	-0.3252	-0.8832 to 0.2328	No	ns	0.7562
1.8517	0.373673		0.357327	1.11547		1.78355	1.40145		1.32699	1.01512			0.747467					AGE	3.705	1	3.705	F (1, 320) = 13.12	P=0.0003		3 WEEKS:Ampkα vs. 6 WEEKS:Ampkα	0.3325	-0.04947 to 0.7145	No	ns	0.1508
1.24227	1.18914		0.225684	1.06246			0.751561			0.852079		2.80475	0.637809					GENOTYPE	3.131	5	0.6261	F (5, 320) = 2.217	P=0.0524		3 WEEKS:Dead SNF1A OE vs. 6 WEEKS:Dead SNF1A OE	0.2541	-0.1448 to 0.6531	No	ns	0.6247
0.998486			1.07448	0.380926		1.11905	1.06383			1.19707		1.06553	0.384178					Residual	90.36	320	0.2824				3 WEEKS:SNF1AOE vs. 6 WEEKS:SNF1AOE	0.3203	-0.1456 to 0.7861	No	ns	0.4963
	1.27778		0.834321	1.04184		2.17409	0.62376			0.612929		2.09357	0.515279
0.877347	1.48047		0.328247	0.217962		2.2524	0.362513		1.28717	0.583567		1.04322						Difference between row means
1.177	1.20174		0.585293	1.1672		0.871837	1.19452		1.63477	0.322667			0.627495					Predicted (LS) mean of 3 WEEKS	0.955
	0.678555		0.258692	0.326448		0.724799	1.00119			1.05153		0.652218	0.94686					Predicted (LS) mean of 6 WEEKS	0.7352
0.73686	0.4244		0.340186	1.58547		1.08153	0.57608		1.93926	0.47619		1.04146	0.875					Difference between predicted means	0.2198
1.84072	0.97712						1.39024			0.701108			0.53143					SE of difference	0.06068
	0.513596						0.696425			1.09991		1.09448	0.203342					95% CI of difference	0.1004 to 0.3392
2.55527	0.424644					1.4592	1.34572		2.0346			0.616716	0.399168
1.46173	1.40555					0.780093	0.767924		2.35633	0.68962		0.120764	0.468864					Data summary
2.1012	0.623293					0.781558	1.05731		0.899444	1.08988		0.511658						Number of columns (GENOTYPE)	6
2.72262	0.915469					0.836144	0.764298		0.129808	1.01953		0.161948						Number of rows (AGE)	2
1.18909	0.610994					0.741427			0.450357	1.54018		0.876561						Number of values	332
0.434363	0.344868					1.16599	1.14834		0.651252	0.478261		0.111111
0.221439	0.92132					0.441385	0.111828		0.565443	0.96333		0.306864
0.319096	0.740877					0.915375	0.476283		1.09173	1.59505		0.0582728
0.31602	1.00358					0.264695	1.6669		0.61854	1.19654		0.0783552
0.560065	0.548964					0.347107	0.149969		0.448505	1.40755		0.617815
0.588019	0.610054					0.592616	0.250595		0.681149	0.800659		0.345479
0.232008	1.11086					0.431133	0.439611		0.737416	1.05381		0.589548
0.526731	0.814234					1.29117	0.358755		0.416924	0.61708		0.207066
0.549749						0.547398	1.03445		0.741675	1.59014		0.223718
0.679163						0.392539	0.57652		1.14872	1.16732		0.168685
0.921327						0.457143	0.142085		1.14751	0.62808
0.232008						1.52853	1.49146		0.725782	0.669288
0.191083						1.30325	0.40347		1.13876
0.0872072							0.672657
0.0740329							0.230184
0.293686							0.922524
Figure 3g'															3 W	+		Table Analyzed	TOTAL ACTIVITY						Šídák's multiple comparisons test	Predicted (LS) mean diff.	95.00% CI of diff.	Below threshold?	Summary	Adjusted P Value
																Ampkα OE
w1118			Ampkα OE			Ampkα			Dead SNF1AOE			SNF1A OE				Ampkα		Two-way ANOVA	Ordinary						3 WEEKS :+ vs. 3 WEEKS :Ampkα OE	164.2	-163.1 to 491.4	No	ns	0.9059
3 w	6w		3 w	6w		3 w	6w		3 w	6w		3 w	6w			Dead SNF1AOE		Alpha	0.05						3 WEEKS :+ vs. 3 WEEKS :Ampkα	-100.5	-363.0 to 162.0	No	ns	0.9913
1055	478		524.333			1118.67	237		1238.67	455		738.667	636			SNF1A OE									3 WEEKS :+ vs. 3 WEEKS :Dead SNF1A OE	-55.16	-313.7 to 203.4	No	ns	>0.9999
481.667	970.333		595.333	1436		693	457.333			744.667		775.333	449.333					Source of Variation	% of total variation	P value	P value summary	Significant?			3 WEEKS :+ vs. 3 WEEKS :SNF1AOE	287	22.36 to 551.6	Yes	*	0.0223
961.667	423		955.333	492.667		794.667	866		856.667	1114		1002	240.667		6w	+		Interaction	6.795	<0.0001	****	Yes			6 WEEKS:+ vs. 6 WEEKS:Ampkα OE	300.5	-43.92 to 645.0	No	ns	0.1485
791.667	245.333		721.333	357.333		830.333	334		817	451.667		767	495.333			Ampkα OE		AGE	0.5472	0.1355	ns	No			6 WEEKS:+ vs. 6 WEEKS:Ampkα	388.6	121.0 to 656.2	Yes	***	0.0003
865	639		507	457		1112.67	404.667		717.667	480.667			385.333			Ampkα		GENOTYPE	10.04	<0.0001	****	Yes			6 WEEKS:+ vs. 6 WEEKS:Dead SNF1A OE	92.33	-186.6 to 371.3	No	ns	0.9982
766.333	927.333		1002.33	1417		621.333	699		962.333	425		351.333	695.333			Dead SNF1AOE									6 WEEKS:+ vs. 6 WEEKS:SNF1AOE	505.4	180.6 to 830.1	Yes	****	<0.0001
1029	551		885.667	1024.33		725.667	522.667		1022	750.667		599.667	590.667			SNF1A OE		ANOVA table	SS (Type III)	DF	MS	F (DFn, DFd)			3 WEEKS :+ vs. 6 WEEKS:+	-319.7	-589.0 to -50.43	Yes	**	0.0077
999	1077		443.333	1496.67		374.333	701.333		642.667	254		554.333	290.333					Interaction	3742635	5	748527	F (5, 336) = 5.562			3 WEEKS :Ampkα OE vs. 6 WEEKS:Ampkα OE	-183.3	-574.8 to 208.1	No	ns	0.9445
518.667	938.333		673	1168.67		859.333	1474.67		1037.33	620		313.667	810.667					AGE	301387	1	301387	F (1, 336) = 2.239			3 WEEKS :Ampkα vs. 6 WEEKS:Ampkα	169.4	-91.44 to 430.2	No	ns	0.5933
1179.67	567.667		155.667	778.667		520.667	804.667		448.667			436.667	715.667					GENOTYPE	5528303	5	1105661	F (5, 336) = 8.216			3 WEEKS :Dead SNF1A OE vs. 6 WEEKS:Dead SNF1A OE	-172.2	-440.9 to 96.43	No	ns	0.6146
843.333	1520		556.667	889.667		1056	1386		721.667			637	922.667					Residual	45219259	336	134581				3 WEEKS :SNF1AOE vs. 6 WEEKS:SNF1AOE	-101.3	-422.2 to 219.6	No	ns	0.999
689.333	761		812.333	646.667		651.333	1386		256	894		755.333
985	1609.67		944	275.667		854	605.333		1107.67	404.333		1050.67						Difference between row means
833.333			501.333	802.667		1303	1556		659.667	196.333		408.667	758.667					Predicted (LS) mean of 3 WEEKS	776.9
939	1241		583	406.333		999.333			673	1001.33		973.333	1061.33					Predicted (LS) mean of 6 WEEKS	838.9
	700.333		321	646		783.667	864.667		860	293		585.333	665.667					Difference between predicted means	-61.92
	943.333					1001	720		1222	694.333		630.333						SE of difference	41.38
668.667	1246.33					529	1152		692.333	964.667		607.333	486					95% CI of difference	-143.3 to 19.47
509	995.667					951			1177	628		798.667	579.667
774.333	2110.33					1160.67	1218		577.667	1458.33		125	269.333					Data summary
620	1284.67					1137.33	908.333		924			456.667	1014.33					Number of columns (GENOTYPE)	6
409	1219					1153	845.333		318	1489.67		232						Number of rows (AGE)	2
1323.67	867.667						1244.33		666.667	1670.67		693.667						Number of values	348
757	673.667						1036.33		827.667	1686.67		209.667
498.667	572.333					1544.67	148.333		1081.67	1655.67		390.667
612	1201					856	566		1177.67	1631.67		247
1205.33	2212.33					828.333	732.333		364.667	1908.67		153
1155	1797.67					990	335		799	1476.67		388.333
	1387.67						407.333		843.333	1531		125.667
588.333	2204.67					1131.67	494.333		548.667	647.333		351.667
595.333	2241.33					752.667	507.333		802	1770		365.333
1261.67						828.333	689.333		1413	1807		319.667
1013.67						610.667	436.333		1274.33	1339.67		389
1218.33						874.667	203		999.333	1420
685						763	724.667		911.667
668.333						1323.33	357.667		1307
501							563
346.333							853.667
470.333							628.667
Figure 3h'															3 W	+		Table Analyzed	DAY ACTIVITY						Šídák's multiple comparisons test	Predicted (LS) mean diff.	95.00% CI of diff.	Below threshold?	Summary	Adjusted P Value
																Ampkα OE
w1118			Ampkα OE			Ampkα			Dead SNF1AOE			SNF1A OE				Ampkα		Two-way ANOVA	Ordinary						3 WEEKS :+ vs. 3 WEEKS :Ampkα OE	26.34	-172.3 to 225.0	No	ns	>0.9999
3 w	6w		3 w	6w		3 w	6w		3 w	6w		3 w	6w			Dead SNF1AOE		Alpha	0.05						3 WEEKS :+ vs. 3 WEEKS :Ampkα	-129.9	-286.5 to 26.64	No	ns	0.2051
661.667	298.333		247.333	1073		535.333	101		465.667	225		293.333	300.667			SNF1A OE									3 WEEKS :+ vs. 3 WEEKS :Dead SNF1A OE	-4.188	-163.2 to 154.8	No	ns	>0.9999
147.333	370.333		313	799.333		257	245		644	350.667		368.333	203.333					Source of Variation	% of total variation	P value	P value summary	Significant?			3 WEEKS :+ vs. 3 WEEKS :SNF1AOE	99.08	-62.58 to 260.7	No	ns	0.6852
494	133.667		521.333	310		495.667	423.333		304.333	564.333		447.333	141		6w	+		Interaction	7.401	<0.0001	****	Yes			6 WEEKS:+ vs. 6 WEEKS:Ampkα OE	101.2	-104.3 to 306.7	No	ns	0.9179
513.667	180.667		374	220.333		414.333	178		459.667	234.667		433.667	244.333			Ampkα OE		AGE	1.844	0.0078	**	Yes			6 WEEKS:+ vs. 6 WEEKS:Ampkα	204.4	42.30 to 366.6	Yes	**	0.0034
568.333	139.667		246.333	311.667		722	142		360	168			232.667			Ampkα		GENOTYPE	3.595	0.0174	*	Yes			6 WEEKS:+ vs. 6 WEEKS:Dead SNF1A OE	41.36	-126.1 to 208.8	No	ns	>0.9999
438	322.333		530.333	818		296.667	279.667		397.333	137.333		200.667	408.333			Dead SNF1AOE									6 WEEKS:+ vs. 6 WEEKS:SNF1AOE	165.4	-26.21 to 357.1	No	ns	0.1596
642.667	347.667		470	431		497.333	255		556	320.333		393.333	370			SNF1A OE		ANOVA table	SS (Type III)	DF	MS	F (DFn, DFd)	P value		3 WEEKS :+ vs. 6 WEEKS:+	-194.8	-357.9 to -31.71	Yes	**	0.0071
336.333	561.333		257	815.333		212.667	294		332.333	170.333		199	165.667					Interaction	1436472	5	287294	F (5, 339) = 5.745	P<0.0001		3 WEEKS :Ampkα OE vs. 6 WEEKS:Ampkα OE	-120	-354.7 to 114.8	No	ns	0.8925
88.6667	712.333		413.667	468.333		403.667	737		489	202.333		186.333	372.333					AGE	357991	1	357991	F (1, 339) = 7.159	P=0.0078		3 WEEKS :Ampkα vs. 6 WEEKS:Ampkα	139.5	-16.02 to 295.1	No	ns	0.1221
662	219.667		84	132.667		240.667	246.667		203.333	696.333		273	404					GENOTYPE	697685	5	139537	F (5, 339) = 2.790	P=0.0174		3 WEEKS :Dead SNF1A OE vs. 6 WEEKS:Dead SNF1A OE	-149.3	-312.7 to 14.16	No	ns	0.1068
364.667	654		203.333	594		449.667	658.667		344	442		393	585.333					Residual	16951715	339	50005				3 WEEKS :SNF1AOE vs. 6 WEEKS:SNF1AOE	-128.5	-318.9 to 61.96	No	ns	0.5291
439	242		423.333	360.333		338.667	927		153.667	234.333		480.333	738.667
429	696		492.667	160.667		619.333	378.667		360.667	116.667			879.333					Difference between row means
282			214.333	242.667		707	1015		205	122.333		232	505.333					Predicted (LS) mean of 3 WEEKS	366.5
372	802		374.667	231.333		354	833.667		360.667	524		471.333	549					Predicted (LS) mean of 6 WEEKS	433.3
705	382.667		176.667	292.667		403.667	475		340	80.3333		313	441					Difference between predicted means	-66.76
	485					704.333	314.333			331.333		346						SE of difference	24.95
294.667	528.333					183.333	428.333		527.333	292.333		234	128.333					95% CI of difference	-115.8 to -17.68
272.333	621					396				338.667		482	361.333
342	1529.67					506.333	608		355	530.333		76.3333	137.333					Data summary
324.333	550.667					672.667	301.333		400.667			230.667	624					Number of columns (GENOTYPE)	6
160.667	598					534.667	585.333		132.667	694.667		138						Number of rows (AGE)	2
	272						703.667		281	633		272.333						Number of values	351
291	252.333					1070.33	584		364	1013		113.333
228.333	210.333					975	61.6667		367	869.333		181.333
292.667	521.667					196.667	147		415	1058		183.667
335.667	1369					511.667	191		155.667	1273		83.3333
500.667	959					530	123.333		393.333	733		215.333
329	724.333					1059	157		437	858.333		44.3333
236	1101.67					725.333	204		187	357		203.333
207.667	865.667					110.667	151		413.667	903.667		244
545						276.333	293.333		390.333	915.333		192
283.667						269	154.667		287.667	714		170.667
466.333						404.333	42		448.333	847.667
322.333						328.333	157		494
151.667						752.667	134.667
303							264
77.6667							256
219							271.333
Figure 3i'															3 W	+		Table Analyzed	NIGHT ACTIVITY						Šídák's multiple comparisons test	Predicted (LS) mean diff.	95.00% CI of diff.	Below threshold?	Summary	Adjusted P Value
																Ampkα OE
w1118			Ampkα OE			Ampkα			Dead SNF1AOE			SNF1A OE				Ampkα		Two-way ANOVA	Ordinary						3 WEEKS :+ vs. 3 WEEKS :Ampkα OE	122.4	-44.08 to 288.8	No	ns	0.3831
3 w	6w		3 w	6w		3 w	6w		3 w	6w		3 w	6w			Dead SNF1AOE		Alpha	0.05						3 WEEKS :+ vs. 3 WEEKS :Ampkα	-37.7	-168.6 to 93.23	No	ns	0.9997
393.333	179.667		277			583.333	136		552.333	230		445.333	335.333			SNF1A OE									3 WEEKS :+ vs. 3 WEEKS :Dead SNF1A OE	15.94	-120.1 to 152.0	No	ns	>0.9999
334.333	600		282.333	636.667		436	212.333		357.333	394		407	246					Source of Variation	% of total variation	P value	P value summary	Significant?			3 WEEKS :+ vs. 3 WEEKS :SNF1AOE	183.1	48.25 to 318.1	Yes	**	0.0011
467.667	289.333		434	182.667		299	442.667		357.667	549.667		554.667	99.6667		6w	+		Interaction	7.646	<0.0001	****	Yes			6 WEEKS:+ vs. 6 WEEKS:Ampkα OE	145	-29.45 to 319.4	No	ns	0.2031
278	64.6667		347.333	137		416	156		565	217		333.333	251			Ampkα OE		AGE	0.3844	0.2012	ns	No			6 WEEKS:+ vs. 6 WEEKS:Ampkα	141	7.053 to 274.9	Yes	*	0.0304
296.667	499.333		260.667	145.333		390.667	262.667		466	312.667		232.667	152.667			Ampkα		GENOTYPE	12.24	<0.0001	****	Yes			6 WEEKS:+ vs. 6 WEEKS:Dead SNF1A OE	21.62	-117.5 to 160.8	No	ns	>0.9999
328.333	605		472	599		324.667	419.333		310.333	287.667		150.667	287			Dead SNF1AOE									6 WEEKS:+ vs. 6 WEEKS:SNF1AOE	269.1	107.4 to 430.8	Yes	****	<0.0001
386.333	203.333		415.667	593.333		228.333	267.667		548.333	430.333		206.333	220.667			SNF1A OE		ANOVA table	SS (Type III)	DF	MS	F (DFn, DFd)	P value		3 WEEKS :+ vs. 6 WEEKS:+	-127.3	-264.5 to 9.979	No	ns	0.095
662.667	515.667		186.333	681.333		161.667	407.333		245.333	83.6667		355.333	124.667					Interaction	1125965	5	225193	F (5, 336) = 6.526	P<0.0001		3 WEEKS :Ampkα OE vs. 6 WEEKS:Ampkα OE	-104.7	-302.9 to 93.58	No	ns	0.8657
430	226		259.333	700.333		455.667	737.667		377.667	417.667		127.333	438.333					AGE	56603	1	56603	F (1, 336) = 1.640	P=0.2012		3 WEEKS :Ampkα vs. 6 WEEKS:Ampkα	51.44	-76.04 to 178.9	No	ns	0.9853
517.667	348		71.6667	646		280	558		102.333	731		163.667	311.667					GENOTYPE	1802651	5	360530	F (5, 336) = 10.45	P<0.0001		3 WEEKS :Dead SNF1A OE vs. 6 WEEKS:Dead SNF1A OE	-121.6	-259.5 to 16.38	No	ns	0.1386
478.667	866		353.333	295.667		606.333	727.333					244	337.333					Residual	11594581	336	34508				3 WEEKS :SNF1AOE vs. 6 WEEKS:SNF1AOE	-41.3	-201.0 to 118.4	No	ns	>0.9999
250.333	519		389	286.333		312.667	459		454.667	659.667		275
556	913.667		451.333	115		234.667	226.667		312.333	287.667		433.333						Difference between row means
551.333	983.333		287	560		596	541		520	74		176.667	253.333					Predicted (LS) mean of 3 WEEKS	393.3
567	439		208.333	175		645.333	904.667		505	477.333		502	512.333					Predicted (LS) mean of 6 WEEKS	420.1
	317.667		144.333	353.333		380	389.667		165	212.667		272.333	224.667					Difference between predicted means	-26.81
	458.333					296.667	405.667		239.667	363		284.333	484					SE of difference	20.93
374	718					345.667	723.667		222.667	672.333		373.333	357.667					95% CI of difference	-67.99 to 14.37
236.667	374.667					555	546.667		523.333	289.333		316.667	218.333
432.333	580.667					654.333	610		185.333	723.667		48.6667	132					Data summary
295.667	734					464.667	607		385.667	928		226	390.333					Number of columns (GENOTYPE)	6
248.333	621					618.333	260		463.667			94						Number of rows (AGE)	2
538.333	595.667					656.333	540.667		714.667	795		421.333						Number of values	348
466	421.333					594.667	452.333		762.667	1037.67		96.3333
270.333	362					569.667	86.6667		209	673.667		209.333
319.333	679.333					659.333	419		405.667	786.333		63.3333
	843.333					316.667	541.333		406.333	573.667		69.6667
654.333	838.667					460	211.667		361.667	635.667		173
	663.333					692.333	250.333		388.333	743.667		81.3333
352.333	1103					406.333	290.333			672.667		148.333
387.667						642	356.333			290.333		121.333
716.667						552	396		551	866.333		127.667
730						341.667	281.667		417.667	891.667
752						470.333	161		599.333	625.667
362.667						434.667	567.667			572.333
516.667						570.667	223
198							299
268.667							597.667
251.333							357.333

## Sheet: Fig 4
																		Table Analyzed	ELAVII>AMPK_M						Šídák's multiple comparisons test	Predicted (LS) mean diff.	95.00% CI of diff.	Below threshold?	Summary	Adjusted P Value
															3 W	+
Figure 4a																Ampkα OE		Two-way ANOVA	Ordinary						3 WEEKS:+ vs. 3 WEEKS:Ampkα OE	0.435	-1.039 to 1.909	No	ns	0.9989
w1118			Ampkα OE			Ampkα			Dead SNF1AOE			SNF1A OE				Ampkα		Alpha	0.05						3 WEEKS:+ vs. 3 WEEKS:Ampkα	0.7717	-0.7026 to 2.246	No	ns	0.8155
3 w	6w		3 w	6w		3 w	6w		3 w	6w		3 w	6w			Dead SNF1AOE									3 WEEKS:+ vs. 3 WEEKS:Dead SNF1A OE	0.1483	-1.326 to 1.623	No	ns	>0.9999
4.15	3.27		4.67	3.25		4	3.14		4.14	3.33		3.33	2			SNF1A OE		Source of Variation	% of total variation	P value	P value summary	Significant?			3 WEEKS:+ vs. 3 WEEKS:SNF1AOE	1.458	-0.01592 to 2.933	No	ns	0.0544
4.92	4.55		4.5	3.33		3.69	4		4	2.55		2.86	3.6					Interaction	6.181	0.4933	ns	No			6 WEEKS:+ vs. 3 WEEKS:+	-0.6683	-1.931 to 0.5941	No	ns	0.8034
6	5.14		3.8	4		4.27	3.43		5.69	3.33		3.71	3.5		6w	+		AGE	19.89	0.0025	**	Yes			6 WEEKS:+ vs. 6 WEEKS:Ampkα	0.5667	-0.9559 to 2.089	No	ns	0.9866
5																Ampkα OE		GENOTYPE	27.56	0.0136	*	Yes			6 WEEKS:+ vs. 6 WEEKS:Ampkα OE	0.5633	-0.9593 to 2.086	No	ns	0.9873
																Ampkα									6 WEEKS:+ vs. 6 WEEKS:Dead SNF1A OE	1.02	-0.5026 to 2.543	No	ns	0.4666
																Dead SNF1AOE		ANOVA table	SS (Type III)	DF	MS	F (DFn, DFd)	P value		6 WEEKS:+ vs. 6 WEEKS:SNF1AOE	1.057	-0.4659 to 2.579	No	ns	0.4114
																SNF1A OE		Interaction	1.43	4	0.3574	F (4, 25) = 0.8742	P=0.4933		6 WEEKS:+ vs. 6 WEEKS:SNF1AOE	1.057	-0.4659 to 2.579	No	ns	0.4114
																		AGE	4.599	1	4.599	F (1, 25) = 11.25	P=0.0025		3 WEEKS:Ampkα OE vs. 6 WEEKS:Ampkα OE	0.7967	-0.9056 to 2.499	No	ns	0.9097
																		GENOTYPE	6.374	4	1.593	F (4, 25) = 3.898	P=0.0136		3 WEEKS:Ampkα vs. 6 WEEKS:Ampkα	0.4633	-1.239 to 2.166	No	ns	0.9996
																		Residual	10.22	25	0.4088				3 WEEKS:Dead SNF1A OE vs. 6 WEEKS:Dead SNF1A OE	1.54	-0.1623 to 3.242	No	ns	0.1036
																									3 WEEKS:SNF1AOE vs. 6 WEEKS:SNF1AOE	0.2667	-1.436 to 1.969	No	ns	>0.9999
																		Difference between row means
																		Predicted (LS) mean of 3 WEEKS	4.196
																		Predicted (LS) mean of 6 WEEKS	3.449
																		Difference between predicted means	0.747
																		SE of difference	0.2227
																		95% CI of difference	0.2883 to 1.206
																		Data summary
																		Number of columns (GENOTYPE)	5
																		Number of rows (AGE)	2
																		Number of values	35
															3 W	+		Table Analyzed	ELAVII>AMPK_F						Šídák's multiple comparisons test	Predicted (LS) mean diff.	95.00% CI of diff.	Below threshold?	Summary	Adjusted P Value
Figure 4a'																Ampkα OE
w1118			Ampkα OE			Ampkα			Dead SNF1AOE			SNF1A OE				Ampkα		Two-way ANOVA	Ordinary						3 WEEKS:+ vs. 3 WEEKS:Ampkα OE	-0.6058	-2.074 to 0.8626	No	ns	0.9669
3 w	6w		3 w	6w		3 w	6w		3 w	6w		3 w	6w			Dead SNF1AOE		Alpha	0.05						3 WEEKS:+ vs. 3 WEEKS:Ampkα	-0.9883	-2.597 to 0.6202	No	ns	0.6061
4.14	3		5.02	3.82		5.87	2.92		5	4.25		3.5	2.57			SNF1A OE									3 WEEKS:+ vs. 3 WEEKS:Dead SNF1A OE	-0.5883	-2.197 to 1.020	No	ns	0.989
5	5.45		4.9	4.25		6	4.5		4.67	4.09		4.55	2.6					Source of Variation	% of total variation	P value	P value summary	Significant?			3 WEEKS:+ vs. 3 WEEKS:SNF1AOE	0.2483	-1.360 to 1.857	No	ns	>0.9999
3.75	3		5.25			4.33	4.35		5.33	4.11		4.44	3.67		6w	+		Interaction	1.101	0.9487	ns	No			6 WEEKS:+ vs. 3 WEEKS:+	-1.073	-2.387 to 0.2400	No	ns	0.194
4.43	3.75		4.9													Ampkα OE		AGE	32.38	0.0001	***	Yes			6 WEEKS:+ vs. 6 WEEKS:Ampkα	-0.585	-2.194 to 1.024	No	ns	0.9896
																Ampkα		GENOTYPE	20.46	0.0267	*	Yes			6 WEEKS:+ vs. 6 WEEKS:Ampkα OE	-0.6967	-2.554 to 1.161	No	ns	0.986
																Dead SNF1AOE									6 WEEKS:+ vs. 6 WEEKS:Dead SNF1A OE	-0.8117	-2.420 to 0.7969	No	ns	0.854
																SNF1A OE		ANOVA table	SS (Type III)	DF	MS	F (DFn, DFd)	P value		6 WEEKS:+ vs. 6 WEEKS:SNF1AOE	0.3917	-1.217 to 2.000	No	ns	0.9999
																		Interaction	0.3457	4	0.08642	F (4, 26) = 0.1761	P=0.9487		6 WEEKS:+ vs. 6 WEEKS:SNF1AOE	0.3917	-1.217 to 2.000	No	ns	0.9999
																		AGE	10.17	1	10.17	F (1, 26) = 20.72	P=0.0001		3 WEEKS:Ampkα OE vs. 6 WEEKS:Ampkα OE	0.9825	-0.9875 to 2.953	No	ns	0.8643
																		GENOTYPE	6.425	4	1.606	F (4, 26) = 3.274	P=0.0267		3 WEEKS:Ampkα vs. 6 WEEKS:Ampkα	1.477	-0.3807 to 3.334	No	ns	0.2251
																		Residual	12.76	26	0.4906				3 WEEKS:Dead SNF1A OE vs. 6 WEEKS:Dead SNF1A OE	0.85	-1.007 to 2.707	No	ns	0.9247
																									3 WEEKS:SNF1AOE vs. 6 WEEKS:SNF1AOE	1.217	-0.6407 to 3.074	No	ns	0.5053
																		Difference between row means
																		Predicted (LS) mean of 3 WEEKS	4.799
																		Predicted (LS) mean of 6 WEEKS	3.679
																		Difference between predicted means	1.12
																		SE of difference	0.246
																		95% CI of difference	0.6142 to 1.625
																		Data summary
																		Number of columns (GENOTYPE)	5
																		Number of rows (AGE)	2
																		Number of values	36
															3 W	+		Table Analyzed	ELAV(X)>AMPK_M						Šídák's multiple comparisons test	Predicted (LS) mean diff.	95.00% CI of diff.	Below threshold?	Summary	Adjusted P Value
Figure 4b																Ampkα OE
w1118			Ampkα OE			Ampkα			Dead SNF1AOE			SNF1A OE				Ampkα		Two-way ANOVA	Ordinary						3 WEEKS:+ vs. 3 WEEKS:Ampkα OE	0.5592	-1.769 to 2.887	No	ns	0.9999
3 w	6w		3 w	6w		3 w	6w		3 w	6w		3 w	6w			Dead SNF1AOE		Alpha	0.05						3 WEEKS:+ vs. 3 WEEKS:Ampkα	-0.1352	-2.344 to 2.073	No	ns	>0.9999
4.25	3.86667		4.2	3.2		4.6087	3		3.4			4.45455	4.125			SNF1A OE									3 WEEKS:+ vs. 3 WEEKS:Dead SNF1A OE	2.019	-0.1895 to 4.227	No	ns	0.0937
5.71429	3.85185		4.06897	2.25		5.72093	4		2.3	1.6		5.11111						Source of Variation	% of total variation	P value	P value summary	Significant?			3 WEEKS:+ vs. 3 WEEKS:SNF1AOE	0.1993	-2.351 to 2.749	No	ns	>0.9999
	4.375		5	3.12		5.23077	1.38462		2.43902	2.90323					6w	+		Interaction	12.4	0.142	ns	No			6 WEEKS:+ vs. 3 WEEKS:+	-0.7921	-3.000 to 1.416	No	ns	0.9879
	4.66667					4.90909			3.71429	3.77778						Ampkα OE		AGE	20.82	0.0018	**	Yes			6 WEEKS:+ vs. 6 WEEKS:Ampkα	1.395	-0.5524 to 3.343	No	ns	0.3434
																Ampkα		GENOTYPE	29.87	0.0082	**	Yes			6 WEEKS:+ vs. 6 WEEKS:Ampkα OE	1.333	-0.6142 to 3.281	No	ns	0.4094
																Dead SNF1AOE									6 WEEKS:+ vs. 6 WEEKS:Dead SNF1A OE	1.43	-0.5178 to 3.377	No	ns	0.3097
																SNF1A OE		ANOVA table	SS (Type III)	DF	MS	F (DFn, DFd)	P value		6 WEEKS:+ vs. 6 WEEKS:SNF1AOE	0.06505	-2.786 to 2.916	No	ns	>0.9999
																		Interaction	4.48	4	1.12	F (4, 19) = 1.959	P=0.1420		6 WEEKS:+ vs. 6 WEEKS:SNF1AOE	0.06505	-2.786 to 2.916	No	ns	>0.9999
																		AGE	7.521	1	7.521	F (1, 19) = 13.15	P=0.0018		3 WEEKS:Ampkα OE vs. 6 WEEKS:Ampkα OE	1.566	-0.5157 to 3.648	No	ns	0.2776
																		GENOTYPE	10.79	4	2.697	F (4, 19) = 4.716	P=0.0082		3 WEEKS:Ampkα vs. 6 WEEKS:Ampkα	2.322	0.3749 to 4.270	Yes	*	0.0116
																		Residual	10.87	19	0.5719				3 WEEKS:Dead SNF1A OE vs. 6 WEEKS:Dead SNF1A OE	0.203	-1.745 to 2.151	No	ns	>0.9999
																									3 WEEKS:SNF1AOE vs. 6 WEEKS:SNF1AOE	0.6578	-2.465 to 3.781	No	ns	>0.9999
																		Difference between row means
																		Predicted (LS) mean of 3 WEEKS	4.454
																		Predicted (LS) mean of 6 WEEKS	3.345
																		Difference between predicted means	1.108
																		SE of difference	0.3056
																		95% CI of difference	0.4687 to 1.748
																		Data summary
																		Number of columns (GENOTYPE)	5
																		Number of rows (AGE)	2
																		Number of values	29
															3 W	+		Table Analyzed	ELAV(X)>AMPK_F						Šídák's multiple comparisons test	Predicted (LS) mean diff.	95.00% CI of diff.	Below threshold?	Summary	Adjusted P Value
Figure 4b'																Ampkα OE
w1118			Ampkα OE			Ampkα			Dead SNF1AOE			SNF1A OE				Ampkα		Two-way ANOVA	Ordinary						3 WEEKS:+ vs. 3 WEEKS:Ampkα OE	0.205	-1.783 to 2.193	No	ns	>0.9999
3 w	6w		3 w	6w		3 w	6w		3 w	6w		3 w	6w			Dead SNF1AOE		Alpha	0.05						3 WEEKS:+ vs. 3 WEEKS:Ampkα	-0.005817	-1.891 to 1.880	No	ns	>0.9999
4.9	5.38462		5	3.5		5.5814	4.33333		5.38462	4.4		4.88889	3.88889			SNF1A OE									3 WEEKS:+ vs. 3 WEEKS:Dead SNF1A OE	0.2477	-1.638 to 2.133	No	ns	>0.9999
5.75	3.25		5.36	3.26316		5.71429	4.07692		5.14286	2.2069		5.44444	2.5					Source of Variation	% of total variation	P value	P value summary	Significant?			3 WEEKS:+ vs. 3 WEEKS:SNF1AOE	0.175	-1.711 to 2.061	No	ns	>0.9999
	4.14286		5	3.01		4.82759	4.16		4.6	3.10345		4.26667	4.57143		6w	+		Interaction	2.769	0.7515	ns	No			6 WEEKS:+ vs. 3 WEEKS:+	-1.006	-2.891 to 0.8800	No	ns	0.7951
	4.5					5.2			5.18182	3.86667		6	4.66667			Ampkα OE		AGE	52.07	<0.0001	****	Yes			6 WEEKS:+ vs. 6 WEEKS:Ampkα	0.1293	-1.534 to 1.792	No	ns	>0.9999
																Ampkα		GENOTYPE	7.025	0.3304	ns	No			6 WEEKS:+ vs. 6 WEEKS:Ampkα OE	1.062	-0.6013 to 2.725	No	ns	0.543
																Dead SNF1AOE									6 WEEKS:+ vs. 6 WEEKS:Dead SNF1A OE	0.9251	-0.6145 to 2.465	No	ns	0.6367
																SNF1A OE		ANOVA table	SS (Type III)	DF	MS	F (DFn, DFd)	P value		6 WEEKS:+ vs. 6 WEEKS:SNF1AOE	0.4126	-1.127 to 1.952	No	ns	0.9996
																		Interaction	0.8525	4	0.2131	F (4, 25) = 0.4780	P=0.7515		6 WEEKS:+ vs. 6 WEEKS:SNF1AOE	0.4126	-1.127 to 1.952	No	ns	0.9996
																		AGE	16.03	1	16.03	F (1, 25) = 35.95	P<0.0001		3 WEEKS:Ampkα OE vs. 6 WEEKS:Ampkα OE	1.862	0.08449 to 3.640	Yes	*	0.0343
																		GENOTYPE	2.163	4	0.5407	F (4, 25) = 1.213	P=0.3304		3 WEEKS:Ampkα vs. 6 WEEKS:Ampkα	1.141	-0.5222 to 2.804	No	ns	0.4294
																		Residual	11.15	25	0.4459				3 WEEKS:Dead SNF1A OE vs. 6 WEEKS:Dead SNF1A OE	1.683	0.1435 to 3.223	Yes	*	0.0237
																									3 WEEKS:SNF1AOE vs. 6 WEEKS:SNF1AOE	1.243	-0.2964 to 2.783	No	ns	0.2058
																		Difference between row means
																		Predicted (LS) mean of 3 WEEKS	5.201
																		Predicted (LS) mean of 6 WEEKS	3.814
																		Difference between predicted means	1.387
																		SE of difference	0.2313
																		95% CI of difference	0.9106 to 1.863
																		Data summary
																		Number of columns (GENOTYPE)	5
																		Number of rows (AGE)	2
																		Number of values	35
															3 W	+		Table Analyzed	FLN>AMPK_M						Šídák's multiple comparisons test	Predicted (LS) mean diff.	95.00% CI of diff.	Below threshold?	Summary	Adjusted P Value
Figure 4c																Ampkα OE
w1118			Ampkα OE			Ampkα			Dead SNF1AOE			SNF1A OE				Ampkα		Two-way ANOVA	Ordinary						3 WEEKS:+ vs. 3 WEEKS:Ampkα OE	1.657	0.1015 to 3.212	Yes	*	0.0299
3 w	6w		3 w	6w		3 w	6w		3 w	6w		3 w	6w			Dead SNF1AOE		Alpha	0.05						3 WEEKS:+ vs. 3 WEEKS:Ampkα	1.227	-0.3285 to 2.782	No	ns	0.2314
5.86	3.56		4	2.5		3.27	1.5		2.8	0.8		4.15	3.5			SNF1A OE									3 WEEKS:+ vs. 3 WEEKS:Dead SNF1A OE	2.6	1.045 to 4.155	Yes	***	0.0002
4.5	3.38		3.5	2.8		5	2.5		2.5	2.44		5.09	4.22					Source of Variation	% of total variation	P value	P value summary	Significant?			3 WEEKS:+ vs. 3 WEEKS:SNF1AOE	1.16	-0.3952 to 2.715	No	ns	0.303
4.6	4.14		3.25	1.8		3.77	1.85		2.62			3	3.6		6w	+		Interaction	7.05	0.1236	ns	No			6 WEEKS:+ vs. 3 WEEKS:+	-1.998	-3.330 to -0.6662	Yes	***	0.0008
5.5																Ampkα OE		AGE	26.37	<0.0001	****	Yes			6 WEEKS:+ vs. 6 WEEKS:Ampkα	1.292	-0.3142 to 2.898	No	ns	0.2087
																Ampkα		GENOTYPE	37.17	<0.0001	****	Yes			6 WEEKS:+ vs. 6 WEEKS:Ampkα OE	0.8753	-0.7309 to 2.482	No	ns	0.7667
																Dead SNF1AOE									6 WEEKS:+ vs. 6 WEEKS:Dead SNF1A OE	1.622	-0.2181 to 3.462	No	ns	0.1221
																SNF1A OE		ANOVA table	SS (Type III)	DF	MS	F (DFn, DFd)	P value		6 WEEKS:+ vs. 6 WEEKS:SNF1AOE	-0.5313	-2.138 to 1.075	No	ns	0.9958
																		Interaction	3.644	4	0.9111	F (4, 24) = 2.020	P=0.1236		6 WEEKS:+ vs. 6 WEEKS:SNF1AOE	-0.5313	-2.138 to 1.075	No	ns	0.9958
																		AGE	13.63	1	13.63	F (1, 24) = 30.23	P<0.0001		3 WEEKS:Ampkα OE vs. 6 WEEKS:Ampkα OE	1.217	-0.5791 to 3.012	No	ns	0.4457
																		GENOTYPE	19.21	4	4.804	F (4, 24) = 10.65	P<0.0001		3 WEEKS:Ampkα vs. 6 WEEKS:Ampkα	2.063	0.2675 to 3.859	Yes	*	0.0152
																		Residual	10.82	24	0.451				3 WEEKS:Dead SNF1A OE vs. 6 WEEKS:Dead SNF1A OE	1.02	-0.9878 to 3.028	No	ns	0.8427
																									3 WEEKS:SNF1AOE vs. 6 WEEKS:SNF1AOE	0.3067	-1.489 to 2.102	No	ns	>0.9999
																		Difference between row means
																		Predicted (LS) mean of 3 WEEKS	3.911
																		Predicted (LS) mean of 6 WEEKS	2.59
																		Difference between predicted means	1.321
																		SE of difference	0.2403
																		95% CI of difference	0.8251 to 1.817
																		Data summary
																		Number of columns (GENOTYPE)	5
																		Number of rows (AGE)	2
																		Number of values	34
															3 W	+		Table Analyzed	FLN>AMPK_F						Šídák's multiple comparisons test	Predicted (LS) mean diff.	95.00% CI of diff.	Below threshold?	Summary	Adjusted P Value
Figure 4c'																Ampkα OE
w1118			Ampkα OE			Ampkα			Dead SNF1AOE			SNF1A OE				Ampkα		Two-way ANOVA	Ordinary						3 WEEKS:+ vs. 3 WEEKS:Ampkα OE	0.3567	-1.131 to 1.845	No	ns	>0.9999
3 w	6w		3 w	6w		3 w	6w		3 w	6w		3 w	6w			Dead SNF1AOE		Alpha	0.05						3 WEEKS:+ vs. 3 WEEKS:Ampkα	0.72	-0.7680 to 2.208	No	ns	0.8866
4.6	3.6		4.25	2.5		3.8	1		4.4	3		5	3.2			SNF1A OE									3 WEEKS:+ vs. 3 WEEKS:Dead SNF1A OE	-0.2667	-1.755 to 1.221	No	ns	>0.9999
6	4		4.86	3.25		4.44	1.78		6	3.7		4						Source of Variation	% of total variation	P value	P value summary	Significant?			3 WEEKS:+ vs. 3 WEEKS:SNF1AOE	0.6333	-0.8546 to 2.121	No	ns	0.9561
5.6	2.5		4.22	3		4	2.33		4.8	3.2		3.5	3		6w	+		Interaction	4.042	0.432	ns	No			6 WEEKS:+ vs. 3 WEEKS:+	-1.25	-2.465 to -0.03508	Yes	*	0.0398
3.76	4.5															Ampkα OE		AGE	49.45	<0.0001	****	Yes			6 WEEKS:+ vs. 6 WEEKS:Ampkα	1.847	0.3587 to 3.335	Yes	**	0.007
4.17	3.27															Ampkα		GENOTYPE	19	0.0061	**	Yes			6 WEEKS:+ vs. 6 WEEKS:Ampkα OE	0.6333	-0.8546 to 2.121	No	ns	0.9561
4.67	3.43															Dead SNF1AOE									6 WEEKS:+ vs. 6 WEEKS:Dead SNF1A OE	0.25	-1.238 to 1.738	No	ns	>0.9999
																SNF1A OE		ANOVA table	SS (Type III)	DF	MS	F (DFn, DFd)	P value		6 WEEKS:+ vs. 6 WEEKS:SNF1AOE	0.45	-1.268 to 2.168	No	ns	0.9997
																		Interaction	1.646	4	0.4116	F (4, 25) = 0.9883	P=0.4320		6 WEEKS:+ vs. 6 WEEKS:SNF1AOE	0.45	-1.268 to 2.168	No	ns	0.9997
																		AGE	20.14	1	20.14	F (1, 25) = 48.37	P<0.0001		3 WEEKS:Ampkα OE vs. 6 WEEKS:Ampkα OE	1.527	-0.1915 to 3.245	No	ns	0.1166
																		GENOTYPE	7.738	4	1.935	F (4, 25) = 4.645	P=0.0061		3 WEEKS:Ampkα vs. 6 WEEKS:Ampkα	2.377	0.6585 to 4.095	Yes	**	0.0021
																		Residual	10.41	25	0.4165				3 WEEKS:Dead SNF1A OE vs. 6 WEEKS:Dead SNF1A OE	1.767	0.04851 to 3.485	Yes	*	0.04
																									3 WEEKS:SNF1AOE vs. 6 WEEKS:SNF1AOE	1.067	-0.8543 to 2.988	No	ns	0.7467
																		Difference between row means
																		Predicted (LS) mean of 3 WEEKS	4.511
																		Predicted (LS) mean of 6 WEEKS	2.914
																		Difference between predicted means	1.597
																		SE of difference	0.2297
																		95% CI of difference	1.124 to 2.070
																		Data summary
																		Number of columns (GENOTYPE)	5
																		Number of rows (AGE)	2
																		Number of values	35
															3 W	+		Table Analyzed	ELAVII>AMPK_geotaxis_M						Šídák's multiple comparisons test	Predicted (LS) mean diff.	95.00% CI of diff.	Below threshold?	Summary	Adjusted P Value
Figure 4d																Ampkα OE
w1118			Ampkα OE			Ampkα			Dead SNF1AOE			SNF1A OE				Ampkα		Two-way ANOVA	Ordinary						3 WEEKS:+ vs. 3 WEEKS:Ampkα	-1.928	-39.69 to 35.84	No	ns	>0.9999
3 w	6w		3 w	6w		3 w	6w		3 w	6w		3 w	6w			Dead SNF1AOE		Alpha	0.05						3 WEEKS:+ vs. 3 WEEKS:Ampkα OE	-8.456	-49.57 to 32.66	No	ns	>0.9999
87.5	63.889		82.5	73.077		78.5714	81.6667		37.5	77.5		50	60			SNF1A OE									3 WEEKS:+ vs. 3 WEEKS:Dead SNF1AOE	14.92	-22.84 to 52.69	No	ns	0.9634
75	58.333		67.5	62.5		65.3846	65.3846		40	87.5		88.333	80					Source of Variation	% of total variation	P value	P value summary	Significant?			3 WEEKS:+ vs. 3 WEEKS:SNF1AOE	-6.859	-53.96 to 40.24	No	ns	>0.9999
47.5	50		58.333	40.625		68.3333			50	50			60.714		6w	+		Interaction	11.57	0.3646	ns	No			6 WEEKS:+ vs. 6 WEEKS:Ampkα	17.04	-17.05 to 51.13	No	ns	0.8303
61.538	52.273		48.611	13.889					62.037	27.5						Ampkα OE		age	0.458	0.6761	ns	No			6 WEEKS:+ vs. 6 WEEKS:Ampkα OE	-15.14	-61.10 to 30.83	No	ns	0.9919
40	67.5			16.667												Ampkα		genotype	14.13	0.268	ns	No			6 WEEKS:+ vs. 6 WEEKS:Dead SNF1AOE	-2.237	-38.58 to 34.10	No	ns	>0.9999
	58.333															Dead SNF1AOE									6 WEEKS:+ vs. 6 WEEKS:SNF1AOE	-8.517	-48.32 to 31.29	No	ns	0.9999
																SNF1A OE		ANOVA table	SS (Type III)	DF	MS	F (DFn, DFd)	P value		3 WEEKS:+ vs. 6 WEEKS:+	3.92	-30.17 to 38.01	No	ns	>0.9999
																		Interaction	1445	4	361.1	F (4, 28) = 1.125	P=0.3646		3 WEEKS:Ampkα OE vs. 6 WEEKS:Ampkα OE	-2.763	-54.15 to 48.63	No	ns	>0.9999
																		age	57.19	1	57.19	F (1, 28) = 0.1782	P=0.6761		3 WEEKS:Ampkα vs. 6 WEEKS:Ampkα	22.88	-14.88 to 60.65	No	ns	0.5952
																		genotype	1765	4	441.2	F (4, 28) = 1.375	P=0.2680		3 WEEKS:Dead SNF1AOE vs. 6 WEEKS:Dead SNF1AOE	-13.24	-53.05 to 26.57	No	ns	0.9912
																		Residual	8987	28	321				3 WEEKS:SNF1AOE vs. 6 WEEKS:SNF1AOE	2.262	-49.13 to 53.65	No	ns	>0.9999
																		Difference between row means
																		Predicted (LS) mean of 3 WEEKS	62.77
																		Predicted (LS) mean of 6 WEEKS	60.16
																		Difference between predicted means	2.613
																		SE of difference	6.189
																		95% CI of difference	-10.06 to 15.29
																		Data summary
																		Number of columns (genotype)	5
																		Number of rows (age)	2
																		Number of values	38
Figure 4d'
w1118			Ampkα OE			Ampkα			Dead SNF1AOE			SNF1A OE			3 W	+		Table Analyzed	ELAVII>AMPK_geotaxis_F						Šídák's multiple comparisons test	Predicted (LS) mean diff.	95.00% CI of diff.	Below threshold?	Summary	Adjusted P Value
3 w	6w		3 w	6w		3 w	6w		3 w	6w		3 w	6w			Ampkα OE
65	18.75		71.875	37.5		63.3333	53.75		46.875	25		34.375	57.5			Ampkα		Two-way ANOVA	Ordinary						3 WEEKS:+ vs. 3 WEEKS:Ampk KD	-7.627	-43.35 to 28.10	No	ns	>0.9999
57.143	68.75		54.545	52.5		37.5	75		70	52.778		32.5	52.778			Dead SNF1AOE		Alpha	0.05						3 WEEKS:+ vs. 3 WEEKS:Ampk OE	-1.242	-36.97 to 34.48	No	ns	>0.9999
37.5	58.333		50	60.294		56.8182			47.917	51.667		91.667	83.333			SNF1A OE									3 WEEKS:+ vs. 3 WEEKS:Dead SNF1AOE	1.313	-34.41 to 37.04	No	ns	>0.9999
62.5	55		67.188			60.4167			43.056			50						Source of Variation	% of total variation	P value	P value summary	Significant?			3 WEEKS:+ vs. 3 WEEKS:SNF1AOE	1.139	-34.58 to 36.86	No	ns	>0.9999
44.231	47.917														6w	+		Interaction	7.826	0.6271	ns	No			6 WEEKS:+ vs. 6 WEEKS:Ampk KD	-0.723	-37.47 to 36.03	No	ns	>0.9999
	21.875															Ampkα OE		age	0.005741	0.9653	ns	No			6 WEEKS:+ vs. 6 WEEKS:Ampk OE	-15	-57.70 to 27.70	No	ns	0.9861
	75															Ampkα		genotype	6.907	0.6799	ns	No			6 WEEKS:+ vs. 6 WEEKS:Dead SNF1AOE	6.227	-30.52 to 42.98	No	ns	>0.9999
																Dead SNF1AOE									6 WEEKS:+ vs. 6 WEEKS:SNF1AOE	-15.16	-51.91 to 21.59	No	ns	0.9505
																SNF1A OE		ANOVA table	SS (Type III)	DF	MS	F (DFn, DFd)	P value		3 WEEKS:+ vs. 6 WEEKS:+	3.9	-27.28 to 35.08	No	ns	>0.9999
																		Interaction	758.9	4	189.7	F (4, 29) = 0.6565	P=0.6271		3 WEEKS:Ampk KD vs. 6 WEEKS:Ampk KD	10.8	-29.87 to 51.48	No	ns	0.999
																		age	0.5567	1	0.5567	F (1, 29) = 0.001926	P=0.9653		3 WEEKS:Ampk OE vs. 6 WEEKS:Ampk OE	-9.858	-55.98 to 36.26	No	ns	>0.9999
																		genotype	669.8	4	167.4	F (4, 29) = 0.5795	P=0.6799		3 WEEKS:Dead SNF1AOE vs. 6 WEEKS:Dead SNF1AOE	8.814	-31.86 to 49.49	No	ns	0.9999
																		Residual	8380	29	289				3 WEEKS:SNF1AOE vs. 6 WEEKS:SNF1AOE	-12.4	-53.07 to 28.27	No	ns	0.9961
																		Difference between row means
																		Predicted (LS) mean of 3 WEEKS	54.56
																		Predicted (LS) mean of 6 WEEKS	54.31
																		Difference between predicted means	0.2516
																		SE of difference	5.732
																		95% CI of difference	-11.47 to 11.98
																		Data summary
																		Number of columns (genotype)	5
																		Number of rows (age)	2
																		Number of values	39
Figure 4e
w1118			Ampkα OE			Ampkα			Dead SNF1AOE			SNF1A OE			3 W	+		Table Analyzed	ELAV(X)>AMPK M						Šídák's multiple comparisons test	Predicted (LS) mean diff.	95.00% CI of diff.	Below threshold?	Summary	Adjusted P Value
3 w	6w		3 w	6w		3 w	6w		3 w	6w		3 w	6w			Ampkα OE
78.125	73.684		88.75	61.538		66.667	63		78.571	79.412		75.5	86.667			Ampkα		Two-way ANOVA	Ordinary						3 WEEKS:+ vs. 3 WEEKS:Ampkα	-19.88	-47.64 to 7.877	No	ns	0.3348
59.375			92.391	70		79.348	79.348		67.5	94.231		70.313				Dead SNF1AOE		Alpha	0.05						3 WEEKS:+ vs. 3 WEEKS:Ampkα OE	-3.239	-32.20 to 25.73	No	ns	>0.9999
			86.364	75		90			83.333	63.889						SNF1A OE									3 WEEKS:+ vs. 3 WEEKS:Dead SNF1AOE	0.0914	-28.87 to 29.06	No	ns	>0.9999
			95	78.333		63.636			50									Source of Variation	% of total variation	P value	P value summary	Significant?			3 WEEKS:+ vs. 3 WEEKS:SNF1AOE	-4.156	-38.78 to 30.46	No	ns	>0.9999
			83.333			60.294			63.889						6w	+		Interaction	24.84	0.0832	ns	No			6 WEEKS:+ vs. 6 WEEKS:Ampkα	2.466	-36.24 to 41.17	No	ns	>0.9999
			77.083													Ampkα OE		Row Factor	0.5899	0.6394	ns	No			6 WEEKS:+ vs. 6 WEEKS:Ampkα OE	2.51	-39.89 to 44.91	No	ns	>0.9999
			97.5													Ampkα		Column Factor	9.041	0.5005	ns	No			6 WEEKS:+ vs. 6 WEEKS:Dead SNF1AOE	-5.493	-45.47 to 34.48	No	ns	>0.9999
																Dead SNF1AOE									6 WEEKS:+ vs. 6 WEEKS:SNF1AOE	-12.98	-61.94 to 35.98	No	ns	0.9988
																SNF1A OE		ANOVA table	SS (Type III)	DF	MS	F (DFn, DFd)	P value		3 WEEKS:+ vs. 6 WEEKS:+	-4.934	-47.34 to 37.47	No	ns	>0.9999
																		Interaction	1098	4	274.5	F (4, 22) = 2.375	P=0.0832		3 WEEKS:Ampkα vs. 6 WEEKS:Ampkα	17.41	-4.286 to 39.11	No	ns	0.199
																		Row Factor	26.08	1	26.08	F (1, 22) = 0.2257	P=0.6394		3 WEEKS:Ampkα OE vs. 6 WEEKS:Ampkα OE	0.815	-28.15 to 29.78	No	ns	>0.9999
																		Column Factor	399.7	4	99.93	F (4, 22) = 0.8646	P=0.5005		3 WEEKS:Dead SNF1AOE vs. 6 WEEKS:Dead SNF1AOE	-10.52	-35.80 to 14.76	No	ns	0.9394
																		Residual	2543	22	115.6				3 WEEKS:SNF1AOE vs. 6 WEEKS:SNF1AOE	-13.76	-56.16 to 28.64	No	ns	0.9915
																		Difference between row means
																		Predicted (LS) mean of 3 WEEKS	74.19
																		Predicted (LS) mean of 6 WEEKS	76.38
																		Difference between predicted means	-2.197
																		SE of difference	4.625
																		95% CI of difference	-11.79 to 7.394
																		Data summary
																		Number of columns (Column Factor)	5
																		Number of rows (Row Factor)	2
																		Number of values	32
Figure 4e'
w1118			Ampkα OE			Ampkα			Dead SNF1AOE			SNF1A OE			3 W	+		Table Analyzed	ELAV(X)>AMPK F						Šídák's multiple comparisons test	Predicted (LS) mean diff.	95.00% CI of diff.	Below threshold?	Summary	Adjusted P Value
3 w	6w		3 w	6w		3 w	6w		3 w	6w		3 w	6w			Ampkα OE
72.0588	73.684		80	65.385		76.042	54.348		81.818	51		38.889	78.571			Ampkα		Two-way ANOVA	Ordinary						3 WEEKS:+ vs. 3 WEEKS:Ampkα	5.547	-30.72 to 41.81	No	ns	>0.9999
100			73.611	60.87		65.385	72.368		93.333	43.103		87.5	80.556			Dead SNF1AOE		Alpha	0.05						3 WEEKS:+ vs. 3 WEEKS:Ampkα OE	12.42	-23.33 to 48.18	No	ns	0.9884
			85	57.692		93.75	76.316		83.333	70.833		87.5				SNF1A OE									3 WEEKS:+ vs. 3 WEEKS:Dead SNF1AOE	6.336	-29.93 to 42.60	No	ns	>0.9999
			86.667	29.762		75	69.792		66.176	46.429								Source of Variation	% of total variation	P value	P value summary	Significant?			3 WEEKS:+ vs. 3 WEEKS:SNF1AOE	14.73	-26.56 to 56.02	No	ns	0.9854
			100			80	71.154		53.333	43.333					6w	+		Interaction	15.27	0.0891	ns	No			6 WEEKS:+ vs. 6 WEEKS:Ampkα	20.26	-30.31 to 70.83	No	ns	0.9628
			58.75			57.5			86.111							Ampkα OE		Row Factor	9.985	0.0219	*	Yes			6 WEEKS:+ vs. 6 WEEKS:Ampkα OE	4.888	-44.66 to 54.44	No	ns	>0.9999
			79.348			88.235			93.75							Ampkα		Column Factor	6.157	0.4808	ns	No			6 WEEKS:+ vs. 6 WEEKS:Dead SNF1AOE	22.74	-26.80 to 72.29	No	ns	0.9036
						52.941										Dead SNF1AOE									6 WEEKS:+ vs. 6 WEEKS:SNF1AOE	-5.88	-61.27 to 49.52	No	ns	>0.9999
																SNF1A OE		ANOVA table	SS (Type III)	DF	MS	F (DFn, DFd)	P value		3 WEEKS:+ vs. 6 WEEKS:+	12.35	-43.05 to 67.74	No	ns	0.9999
																		Interaction	1886	4	471.6	F (4, 34) = 2.206	P=0.0891		3 WEEKS:Ampkα vs. 6 WEEKS:Ampkα	27.06	-1.294 to 55.40	No	ns	0.0714
																		Row Factor	1233	1	1233	F (1, 34) = 5.770	P=0.0219		3 WEEKS:Ampkα OE vs. 6 WEEKS:Ampkα OE	4.811	-20.97 to 30.60	No	ns	>0.9999
																		Column Factor	760.5	4	190.1	F (4, 34) = 0.8894	P=0.4808		3 WEEKS:Dead SNF1AOE vs. 6 WEEKS:Dead SNF1AOE	28.75	2.270 to 55.24	Yes	*	0.025
																		Residual	7268	34	213.8				3 WEEKS:SNF1AOE vs. 6 WEEKS:SNF1AOE	-8.267	-49.56 to 33.02	No	ns	>0.9999
																		Difference between row means
																		Predicted (LS) mean of 3 WEEKS	78.22
																		Predicted (LS) mean of 6 WEEKS	65.28
																		Difference between predicted means	12.94
																		SE of difference	5.387
																		95% CI of difference	1.992 to 23.89
																		Data summary
																		Number of columns (Column Factor)	5
																		Number of rows (Row Factor)	2
																		Number of values	44

## Sheet: Fig 5
															3 W	+		Table Analyzed	ELAV(X)_MHEADS_LIPID OBJECT COUNT						Šídák's multiple comparisons test	Predicted (LS) mean diff.	95.00% CI of diff.	Below threshold?	Summary	Adjusted P Value
Figure 5f																Ampkα OE
w1118			Ampkα OE			Ampkα			Dead SNF1AOE			SNF1A OE				Ampkα		Two-way ANOVA	Ordinary						3 WEEKS:+ vs. 3 WEEKS:Ampkα OE	8.436	-44.32 to 61.19	No	ns	0.976
3 w	6w		3 w	6w		3 w	6w		3 w	6w		3 w	6w			Dead SNF1AOE		Alpha	0.05						3 WEEKS:+ vs. 3 WEEKS:Ampkα	21.83	-24.78 to 68.43	No	ns	>0.9999
68	264		166	330		104	139		171	42		95	161			SNF1A OE									3 WEEKS:+ vs. 3 WEEKS:Dead SNF1AOE	-5.398	-58.86 to 48.06	No	ns	0.4993
200			180	300		82	106		180	56		78	139					Source of Variation	% of total variation	P value	P value summary	Significant?			3 WEEKS:+ vs. 3 WEEKS:SNF1A OE	51.91	-18.24 to 122.1	No	ns	>0.9999
246	226		158	309		135	115		184	238		71	157		6w	+		Interaction	8.486	0.0002	***	Yes			6 WEEKS:+ vs. 6 WEEKS:Ampkα OE	-74.29	-122.7 to -25.91	Yes	***	0.0004
107	244		150	261		162	112		211	68		85	64			Ampkα OE		AGE	0.8311	0.1342	ns	No			6 WEEKS:+ vs. 6 WEEKS:Ampkα	10.33	-40.12 to 60.79	No	ns	>0.9999
62	291		72	187		180	122		192	227		66	115			Ampkα		GENOTYPE	12	<0.0001	****	Yes			6 WEEKS:+ vs. 6 WEEKS:Dead SNF1AOE	28.96	-27.07 to 84.99	No	ns	0.9413
77	147		133	403		202	183		185	189		83	97			Dead SNF1AOE									6 WEEKS:+ vs. 6 WEEKS:SNF1A OE	33.03	-19.72 to 85.79	No	ns	0.7694
105	132		183	243		100	242		164	241		141	8			SNF1A OE		ANOVA table	SS (Type III)	DF	MS	F (DFn, DFd)	P value		3 WEEKS:+ vs. 6 WEEKS:+	2.952	-49.15 to 55.06	No	ns	>0.9999
80	198		136	219		189	206		143	114		136	82					Interaction	77380	4	19345	F (4, 203) = 5.772	P=0.0002		3 WEEKS:Ampkα OE vs. 6 WEEKS:Ampkα OE	-79.77	-128.8 to -30.69	Yes	****	0.0001
246	89		98	192		144	135		152	117			60					AGE	7578	1	7578	F (1, 203) = 2.261	P=0.1342		3 WEEKS:Ampkα vs. 6 WEEKS:Ampkα	-8.543	-53.29 to 36.21	No	ns	>0.9999
163	92		117	374		162	157		159	26			108					GENOTYPE	109445	4	27361	F (4, 203) = 8.164	P<0.0001		3 WEEKS:Dead SNF1AOE vs. 6 WEEKS:Dead SNF1AOE	37.31	-19.98 to 94.60	No	ns	0.7138
213	163		157	260		142	273		158	44			185					Residual	680371	203	3352				3 WEEKS:SNF1A OE vs. 6 WEEKS:SNF1A OE	-15.93	-86.56 to 54.71	No	ns	>0.9999
115	209		143	215		130	105		128	35			151
157	84		99	164		102	190		141	79			151					Difference between row means
118	114		133	270		230	148		120	106			149					Predicted (LS) mean of 3 WEEKS	130.9
182	42		133	259		109	142		135	178			155					Predicted (LS) mean of 6 WEEKS	143.7
158	99		158	269		166	193		131	70			52					Difference between predicted means	-12.8
224	123		201	167		74	85		103				173					SE of difference	8.509
145	107		118	231		75	65		126				86					95% CI of difference	-29.57 to 3.982
126	88		122	167		86	61		99				12
174	68		100	188		62	79						101					Data summary
106	157			224		63	77											Number of columns (GENOTYPE)	5
	73			238		96	48											Number of rows (AGE)	2
				142		66	75											Number of values	213
				102		94	134
				130		104
				171		123
				71		153
				152		169
				73		138
						109
						175
						57
						116
						64
						193
															3 W	+		Table Analyzed	ELAV(X)_MHEADS_LIPID OBJECT AREA						Šídák's multiple comparisons test	Predicted (LS) mean diff.	95.00% CI of diff.	Below threshold?	Summary	Adjusted P Value
Figure 5g																Ampkα OE
w1118			Ampkα OE			Ampkα			Dead SNF1AOE			SNF1A OE				Ampkα		Two-way ANOVA	Ordinary						3 WEEKS:+ vs. 3 WEEKS:Ampkα OE	-483.7	-806.0 to -161.4	Yes	***	0.0004
3 w	6w		3 w	6w		3 w	6w		3 w	6w		3 w	6w			Dead SNF1AOE		Alpha	0.05						3 WEEKS:+ vs. 3 WEEKS:Ampkα	122.1	-162.6 to 406.8	No	ns	0.9893
526.74	334.2		653.69	324.07		1023.4	127.47		798.65	142.57		539.44	755.88			SNF1A OE									3 WEEKS:+ vs. 3 WEEKS:Dead SNF1AOE	-14.69	-341.3 to 311.9	No	ns	>0.9999
105.08	181.31		658.81	136.95		1424.12	125.89		428.31	135.39		216.63	168					Source of Variation	% of total variation	P value	P value summary	Significant?			3 WEEKS:+ vs. 3 WEEKS:SNF1A OE	110	-318.6 to 538.5	No	ns	>0.9999
374.8	603.43		736.34	263.09		865.42	420.98		439.02	187.32		399.47	194.27		6w	+		Interaction	14.8	<0.0001	****	Yes			6 WEEKS:+ vs. 6 WEEKS:Ampkα OE	461.2	163.4 to 758.9	Yes	***	0.0002
279.56	649.15		1059.32	225.45		450.77	573.42		398.6	698.68		301.3	135.99			Ampkα OE		AGE	3.729	0.0011	**	Yes			6 WEEKS:+ vs. 6 WEEKS:Ampkα	459	150.8 to 767.2	Yes	***	0.0004
1113.61	430.16		2001.81	87.07		692.05	1003.49		287	484.19		255.12	198.56			Ampkα		GENOTYPE	13.37	<0.0001	****	Yes			6 WEEKS:+ vs. 6 WEEKS:Dead SNF1AOE	614.3	272.0 to 956.5	Yes	****	<0.0001
838.38	1243.24		950.48	108.63		491.11	423.54		370.95	241.05		511.11	236.4			Dead SNF1AOE									6 WEEKS:+ vs. 6 WEEKS:SNF1A OE	590.1	267.8 to 912.3	Yes	****	<0.0001
483.36	1080.32		741.93	134.68		1248.1	258.24		455.93	207.12		799.38	33.44			SNF1A OE		ANOVA table	SS (Type III)	DF	MS	F (DFn, DFd)	P value		3 WEEKS:+ vs. 6 WEEKS:+	-306.2	-624.5 to 12.15	No	ns	0.0998
429.1	1013.12		1120.94	291.21		142.33	257.76		469.8	170.28		395.78	220.39					Interaction	5421970	4	1355493	F (4, 202) = 10.84	P<0.0001		3 WEEKS:Ampkα OE vs. 6 WEEKS:Ampkα OE	638.7	336.7 to 940.7	Yes	****	<0.0001
433.67	2246.13		2048.42	176.23		380.43	465.51		527.85	351.26			215.62					AGE	1366271	1	1366271	F (1, 202) = 10.92	P=0.0011		3 WEEKS:Ampkα vs. 6 WEEKS:Ampkα	30.76	-242.6 to 304.1	No	ns	>0.9999
858.09	2349.88		1620.8	224		516.07	309.99		331.9	29.19			232.2					GENOTYPE	4900379	4	1225095	F (4, 202) = 9.796	P<0.0001		3 WEEKS:Dead SNF1AOE vs. 6 WEEKS:Dead SNF1AOE	322.8	-27.21 to 672.8	No	ns	0.1373
259.53	814.27		971.12	251.32		460.97	176.82		459.16	293.91			436.47					Residual	25263070	202	125065				3 WEEKS:SNF1A OE vs. 6 WEEKS:SNF1A OE	173.9	-257.6 to 605.4	No	ns	0.9947
272.87	683.9		847.35	230.64		727.79	271.48		750.3	39.84			157.08
694.52	200.64		1533.08	271.93		196.55	434.55		735.99	165.24			526.03					Difference between row means
1014	153.37		993.63	232.11		176.24	921.49		1122.66	202.8			425.28					Predicted (LS) mean of 3 WEEKS	590.5
479.17	220.17		1233.8	318.84		251.11	1072.83		871.5	67.18			414.1					Predicted (LS) mean of 6 WEEKS	418.5
313.43	179.73		306.62	353.51		170.47	639.77		682.74	250.37			55.2					Difference between predicted means	172
446.25	190.69		515.8	686.42		113.47	107.74		698.64				149.12					SE of difference	52.04
748.9	284.75		563.92	422.43		358.52	266.8		214.75				343.34					95% CI of difference	69.39 to 274.6
719.04	1750.34		1321.64	533.01		174.62	263.17		442.81				34.05
407.91	2196.86		538.83	567.95		214.71	155.41						135.29					Data summary
483.89	905.87			623.67		92.05	240.27											Number of columns (GENOTYPE)	5
				475.99		219	237.59											Number of rows (AGE)	2
				740.24		110.67	317.59											Number of values	212
				974.65		133.76	153.43
				513.71		267.67
				307.51		379.24
				652.77		246.09
				574.14		285.59
				73		568.75
						564.22
						462.59
						142.69
						294.44
						493.63
						191.28
															3 W	+		Table Analyzed	ELAV(X)_MBRAIN_LIPID OBJECT COUNT						Šídák's multiple comparisons test	Predicted (LS) mean diff.	95.00% CI of diff.	Below threshold?	Summary	Adjusted P Value
Figure 5h																Ampkα OE
w1118			Ampkα OE			Ampkα			Dead SNF1AOE			SNF1A OE				Ampkα		Two-way ANOVA	Ordinary
3 w	6w		3 w	6w		3 w	6w		3 w	6w		3 w	6w			Dead SNF1AOE		Alpha	0.05						3 WEEKS:+ vs. 3 WEEKS:Ampkα	-19.25	-39.68 to 1.185	No	ns	0.0985
2	38		2	10		33	10		3	1		5	16			SNF1A OE									3 WEEKS:+ vs. 3 WEEKS:Dead SNF1AOE	1.708	-21.81 to 25.23	No	ns	>0.9999
2	22		1	6		7	12		4	9		6	27					Source of Variation	% of total variation	P value	P value summary	Significant?			3 WEEKS:+ vs. 3 WEEKS:SNF1A OE	-4.818	-37.41 to 27.77	No	ns	>0.9999
0	12		1	26		31	10		8	27		2	17		6w	+		Interaction	4.945	0.0158	*	Yes			3 WEEKS:+ vs. 3 WEEKS:Ampkα OE	-6.268	-29.47 to 16.93	No	ns	>0.9999
1	10		5	6		5	37		5	17		28	2			Ampkα OE		AGE	1.079	0.0788	ns	No			6 WEEKS:+ vs. 6 WEEKS:Ampkα	-19.24	-41.64 to 3.154	No	ns	0.1917
0	8		2	18		3	25		3	11		10	7			Ampkα		GENOTYPE	7.354	0.001	**	Yes			6 WEEKS:+ vs. 6 WEEKS:Dead SNF1AOE	-3.108	-27.78 to 21.57	No	ns	>0.9999
10	18		4	14		8	76		10	7		15	5			Dead SNF1AOE									6 WEEKS:+ vs. 6 WEEKS:SNF1A OE	-7.445	-30.65 to 15.76	No	ns	0.9996
9	7		42	20		5	99		16	42		32	0			SNF1A OE		ANOVA table	SS (Type III)	DF	MS	F (DFn, DFd)	P value		6 WEEKS:+ vs. 6 WEEKS:Ampkα OE	-19.97	-41.37 to 1.421	No	ns	0.1058
6	1		17	2		113	75		20	62			15					Interaction	9086	5	1817	F (5, 250) = 2.855	P=0.0158		3 WEEKS:+ vs. 6 WEEKS:+	-6.273	-28.92 to 16.37	No	ns	>0.9999
24	3		13	9		14	58		12	10			4					AGE	1982	1	1982	F (1, 250) = 3.114	P=0.0788		3 WEEKS:Ampkα vs. 6 WEEKS:Ampkα	-6.267	-26.42 to 13.89	No	ns	0.9998
5	2		28	14		8	98		4	3			28					GENOTYPE	13512	5	2702	F (5, 250) = 4.246	P=0.0010		3 WEEKS:Dead SNF1AOE vs. 6 WEEKS:Dead SNF1AOE	-11.09	-36.57 to 14.39	No	ns	0.9843
1	26		28	22		8			2	1			52					Residual	159129	250	636.5				3 WEEKS:SNF1A OE vs. 6 WEEKS:SNF1A OE	-8.9	-41.88 to 24.08	No	ns	>0.9999
18	21		24	37		52	37		5	0			69												3 WEEKS:Ampkα OE vs. 6 WEEKS:Ampkα OE	-19.98	-41.96 to 2.008	No	ns	0.13
21	19		7	48		21	109		6	5			9					Difference between row means
40	26		1	17		66	19		3	2			36					Predicted (LS) mean of 3 WEEKS	18.13
4	5		2	10		3	9		2	95			53					Predicted (LS) mean of 6 WEEKS	24.06
0	18		46	41		79	39		8	5			35					Difference between predicted means	-5.922
1	28		116	34		2	42		11				49					SE of difference	3.355
	44		58	4		12	5		12				32					95% CI of difference	-12.53 to 0.6869
32	8		92	5		8	10		8				0
17	18		76	11		1	5						2					Data summary
0	2		108	8		1	7											Number of columns (GENOTYPE)	6
8	4		46	28		3	2											Number of rows (AGE)	2
1			29	8		0	11											Number of values	262
			12	17		12	3
			22			14
			109			52
						48
						79
						23
						64
						77
						8
						22
						15
						98
															3 W	+		Table Analyzed	ELAV(X)_MBRAIN_LIPID OBJECT AREA						Šídák's multiple comparisons test	Predicted (LS) mean diff.	95.00% CI of diff.	Below threshold?	Summary	Adjusted P Value
Figure 5i																Ampkα OE
w1118			Ampkα OE			Ampkα			Dead SNF1AOE			SNF1A OE				Ampkα		Two-way ANOVA	Ordinary						3 WEEKS:+ vs. 3 WEEKS:Ampkα OE	-15608	-20484 to -10731	Yes	****	<0.0001
3 w	6w		3 w	6w		3 w	6w		3 w	6w		3 w	6w			Dead SNF1AOE		Alpha	0.05						3 WEEKS:+ vs. 3 WEEKS:Ampkα	-1091	-5372 to 3191	No	ns	>0.9999
17.34	645.22		4497.69	98.87		1076.95	32.86		5006.6	25.41		419.15	4580.97			SNF1A OE									3 WEEKS:+ vs. 3 WEEKS:Dead SNF1AOE	-7301	-12246 to -2355	Yes	***	0.0005
99.93	158.27		3478.23	371.13		7016.76	88.74		8462.22	38.65		373.44	66.52					Source of Variation	% of total variation	P value	P value summary	Significant?			3 WEEKS:+ vs. 3 WEEKS:SNF1A OE	-503.8	-7051 to 6044	No	ns	>0.9999
0	5743.07		6985.39	272.38		2018.26	255.9		3760.49	140.03		107.14	119.52		6w	+		Interaction	27.57	<0.0001	****	Yes			6 WEEKS:+ vs. 6 WEEKS:Ampkα OE	5749	1043 to 10455	Yes	**	0.0086
33.65	2938.03		13841.2	162.83		1572.48	798.77		3605.25	2366.93		499.38	14.77			Ampkα OE		AGE	4.97	<0.0001	****	Yes			6 WEEKS:+ vs. 6 WEEKS:Ampkα	4878	48.70 to 9708	Yes	*	0.0662
0	2560.15		13666.9	9.96		4355.18	2956.54		2012.87	628.41		479.83	152.96			Ampkα		GENOTYPE	13.39	<0.0001	****	Yes			6 WEEKS:+ vs. 6 WEEKS:Dead SNF1AOE	5870	519.5 to 11220	Yes	*	0.0299
417.95	6530.34		34267.5	106.7		960.18	697.81		2193.24	242.39		1145.61	13.8			Dead SNF1AOE									6 WEEKS:+ vs. 6 WEEKS:SNF1A OE	5336	291.7 to 10380	Yes	*	0.0431
368.23	8599.03		9646.44	38.8		15770.3	206.76		3035.94	370.07		2852.81	0			SNF1A OE		ANOVA table	SS (Type III)	DF	MS	F (DFn, DFd)	P value		3 WEEKS:+ vs. 6 WEEKS:+	-5874	-10751 to -997.3	Yes	**	0.0103
1530.69			22058.5	55.97		113.85	250.96		1854.08	189.62		257.21	158.35					Interaction	2951381378	4	737845344	F (4, 202) = 24.67	P<0.0001		3 WEEKS:Ampkα OE vs. 6 WEEKS:Ampkα OE	15483	10777 to 20189	Yes	****	<0.0001
323.29	24240.1		26799.7	165.72		489.41	928.67		2924.22	68.89			15.02					AGE	532086188	1	532086188	F (1, 202) = 17.79	P<0.0001		3 WEEKS:Ampkα vs. 6 WEEKS:Ampkα	94.56	-4133 to 4322	No	ns	>0.9999
937.61			27725	206.64		2160.86	409.73		3935.75	17.4			322.01					GENOTYPE	1433648830	4	358412207	F (4, 202) = 11.98	P<0.0001		3 WEEKS:Dead SNF1AOE vs. 6 WEEKS:Dead SNF1AOE	7296	1884 to 12709	Yes	**	0.0022
16.14	2926.74		18656.1	96		3419.15	180.21		19179.2	24.38			1142.73					Residual	6041797808	202	29909890				3 WEEKS:SNF1A OE vs. 6 WEEKS:SNF1A OE	-34.5	-6707 to 6638	No	ns	>0.9999
635.95	4274.66		15897.3	351.9		1518.48	63.44		11902.4	0			255.3
588.65	454.55		23175.6	249.82		411.14	630.18		10043	40.45			6475.57					Difference between row means
243.55	260.27		33661.7	591.27		287.34	5989.82		25867.8	38.8			1431.26					Predicted (LS) mean of 3 WEEKS	5164
114.87	701.97		42982.4	293.24		9.62	13749.4		23381.3	63.3			653.64					Predicted (LS) mean of 6 WEEKS	1771
0	185.76		353.32	938.06		224.59	2522.13		7891.76	25.34			25.35					Difference between predicted means	3393
9.62	296.96		617.35	305.05		31.42	35.78		4729.41				93.34					SE of difference	804.4
125.01	348.84		985.05	1018.39		141.68	42.72		551.87				461.99					95% CI of difference	1807 to 4979
25.69	13776.2		17270	494.08		23.57	135.37		3371.85				0
247.75	5424.34		844.91	892.59		32.62	22.11						43.27					Data summary
0	10480.6			376.2		1279.84	64.07											Number of columns (GENOTYPE)	5
270.94	32200.5			1131.09		55.17	60.61											Number of rows (AGE)	2
42.24				1146.13		0	32											Number of values	212
				97.82		40.26	63.3
				160.05		47.39
				286.41		364.38
				554.67		600.24
						298.18
				73		1513.3
						550.49
						642.05
						18.54
						147.18
						70.92
						115.41
